# Supplementary material for: Pathogenic tau-induced piRNA depletion promotes neuronal death through transposable element dysregulation in neurodegenerative tauopathies
Source: Springer Nature journal article supplement (doi:10.1038/s41593-018-0194-1), 2018-07-20
Supplement: 41593_2018_194_MOESM3_ESM.xls [file 41593_2018_194_MOESM3_ESM.xls]

## Sheet: Drosophila transposons
Transposon	baseMean	log2FoldChange	lfcSE	stat	pvalue	padj	CTRL-1	CTRL-2	CTRL-3	Tau-1	Tau-2	Tau-3
FBti0060275	579.192	-2.74772	0.0926538	-29.6557	2.86014e-193	6.4356e-189	1224	1331	1104	54	174	209
FBti0059640	2280.18	-2.40737	0.0901268	-26.7109	3.51613e-157	3.95582e-153	5156	4799	4006	242	873	1014
FBti0018961	156.559	5.4134	0.264831	20.4409	7.23232e-93	5.42448e-89	0	0	0	119	372	424
FBti0102102	2528.74	2.42851	0.133891	18.138	1.59882e-73	8.99376e-70	861	1100	717	1667	4977	5929
FBti0019052	125.844	-4.7532	0.277649	-17.1194	1.06285e-65	4.78305e-62	348	335	232	0	0	0
FBti0059730	136.909	4.4942	0.263055	17.0846	1.93168e-65	7.2441e-62	6	2	3	81	310	473
FBti0019364	693.107	4.18307	0.247819	16.8795	6.36284e-64	2.04529e-60	32	32	59	413	1429	2459
FBti0019151	7587.49	1.71694	0.113656	15.1065	1.46776e-51	4.12827e-48	4315	4503	3594	3942	12909	19329
FBti0019408	113.705	-4.11501	0.294199	-13.9872	1.86672e-44	4.66701e-41	362	277	188	0	0	0
FBti0019355	58.2861	-3.94279	0.288904	-13.6474	2.09134e-42	4.70573e-39	128	162	132	0	0	0
FBti0019281	554.344	1.65362	0.128939	12.8248	1.19134e-37	2.23386e-34	366	304	256	305	1071	1170
FBti0019469	865.863	1.85616	0.14924	12.4374	1.63737e-35	2.45617e-32	384	528	363	477	1489	2247
FBti0059747	55.6874	-3.21831	0.305988	-10.5178	7.15561e-26	8.94491e-23	174	103	123	0	0	0
FBti0060694	442.457	-1.19097	0.114585	-10.3938	2.64727e-25	3.13507e-22	776	791	660	106	326	343
FBti0020059	145.605	-1.80823	0.179499	-10.0737	7.21999e-24	7.06334e-21	293	296	242	27	64	79
FBti0062928	297.971	-1.47912	0.147234	-10.046	9.56287e-24	8.96559e-21	591	595	426	57	191	198
FBti0059709	78.5966	-2.83585	0.284774	-9.95825	2.32103e-23	2.08902e-20	223	191	134	0	12	14
FBti0063083	146.374	-1.93273	0.197028	-9.80942	1.02552e-22	8.54636e-20	340	277	244	22	60	74
FBti0059744	1162.43	0.896153	0.091625	9.78066	1.36317e-22	1.09545e-19	931	1164	826	528	1923	2140
FBti0019405	316.947	2.34732	0.24108	9.73669	2.103e-22	1.57732e-19	97	115	65	178	504	1082
FBti0019417	48.113	-3.00135	0.308426	-9.73119	2.21982e-22	1.61123e-19	140	84	120	0	0	0
FBti0019521	449.707	1.70211	0.175491	9.69913	3.04083e-22	2.07339e-19	192	291	224	193	981	1107
FBti0102113	732.199	0.777693	0.0853406	9.11282	8.0271e-20	4.30042e-17	674	732	541	309	1158	1379
FBti0060203	24.483	-2.48768	0.311482	-7.98658	1.38729e-15	5.03437e-13	70	50	56	0	0	0
FBti0020061	1921.6	-1.45609	0.186489	-7.80794	5.81281e-15	1.95215e-12	3775	3710	2993	418	1163	1006
FBti0019113	4242.88	1.24043	0.160574	7.72494	1.11907e-14	3.59717e-12	3236	3326	2205	1898	6744	10520
FBti0018861	40.6553	-2.35479	0.312268	-7.54093	4.66615e-14	1.39991e-11	65	159	75	0	0	0
FBti0019343	1660.16	0.709893	0.0998833	7.10723	1.18396e-12	2.83407e-10	1654	1541	1330	663	2489	3290
FBti0019524	92.6742	1.98294	0.279881	7.08495	1.39093e-12	3.26013e-10	41	30	16	39	212	291
FBti0019183	1302.05	1.51841	0.22909	6.62801	3.40237e-11	6.83542e-09	562	1091	476	622	2483	3285
FBti0019073	1147.78	-0.824711	0.125414	-6.57593	4.83501e-11	9.62766e-09	1905	1782	1675	228	1059	1323
FBti0019451	390.378	-2.0042	0.30817	-6.50354	7.84535e-11	1.54849e-08	807	996	811	19	22	148
FBti0018968	856.401	1.55004	0.241244	6.42516	1.31728e-10	2.55518e-08	434	437	438	273	1733	2698
FBti0019128	14.3191	-1.98799	0.311874	-6.37433	1.83765e-10	3.41727e-08	35	40	29	0	0	0
FBti0019762	1185.39	-0.771709	0.122231	-6.31354	2.72721e-10	5.02991e-08	1836	2182	1457	317	989	1271
FBti0018993	508.734	-0.782151	0.124201	-6.29744	3.02595e-10	5.53552e-08	863	822	672	116	433	598
FBti0020099	809.682	1.30665	0.209728	6.23023	4.65748e-10	8.18733e-08	710	452	369	406	1384	1871
FBti0060595	1049.43	0.48456	0.0777928	6.22886	4.69846e-10	8.19535e-08	1088	1136	927	430	1439	1844
FBti0019440	201.162	1.51625	0.244589	6.19916	5.67641e-10	9.67613e-08	73	109	125	135	309	443
FBti0019591	324.52	-1.53436	0.248227	-6.18128	6.35859e-10	1.06772e-07	806	635	433	28	207	223
FBti0019538	2206.9	-1.42745	0.250795	-5.69171	1.25773e-08	1.66472e-06	5531	4146	2772	436	1337	910
FBti0019166	486.21	-1.29344	0.228916	-5.65028	1.60188e-08	2.04795e-06	1050	637	907	66	312	431
FBti0020109	374.319	-1.47866	0.26374	-5.60649	2.06465e-08	2.58093e-06	815	739	604	24	236	289
FBti0019283	1275.16	-0.871525	0.157201	-5.54402	2.95598e-08	3.57594e-06	1977	2615	1521	304	1198	1132
FBti0019047	584.907	-0.609296	0.110153	-5.53138	3.17717e-08	3.70412e-06	931	858	774	161	525	707
FBti0019069	584.907	-0.609296	0.110153	-5.53138	3.17717e-08	3.70412e-06	931	858	774	161	525	707
FBti0019366	584.907	-0.609296	0.110153	-5.53138	3.17717e-08	3.70412e-06	931	858	774	161	525	707
FBti0019754	53.757	-1.66554	0.30334	-5.49065	4.00454e-08	4.62083e-06	47	134	200	0	0	0
FBti0019167	925.779	0.779796	0.143434	5.43663	5.42989e-08	6.04841e-06	934	690	777	396	1511	1711
FBti0020031	1833.89	0.775236	0.145666	5.32203	1.02618e-07	1.08915e-05	1685	1746	1379	656	2844	4089
FBti0018967	75.6623	1.51598	0.285661	5.3069	1.11505e-07	1.15621e-05	21	48	32	31	140	243
FBti0063565	240.708	0.585562	0.110469	5.30072	1.15349e-07	1.18514e-05	233	245	206	107	359	400
FBti0019621	955.372	-0.969842	0.184869	-5.2461	1.55353e-07	1.58172e-05	1525	1674	1496	143	949	951
FBti0020150	71.821	-1.57614	0.304619	-5.17414	2.28958e-07	2.2206e-05	152	213	148	0	0	11
FBti0020094	602.795	1.19078	0.230831	5.15868	2.48703e-07	2.39148e-05	282	444	447	395	919	1076
FBti0019946	14.2257	1.57055	0.305709	5.1374	2.7857e-07	2.64477e-05	2	0	0	11	42	26
FBti0020068	133.13	1.36665	0.266481	5.12848	2.92083e-07	2.75149e-05	49	90	74	86	294	196
FBti0019020	30.0665	-1.54573	0.304682	-5.07327	3.91046e-07	3.5337e-05	40	76	72	2	13	11
FBti0062856	359.554	0.61688	0.122175	5.04917	4.43724e-07	3.95445e-05	324	412	287	143	534	676
FBti0019305	489.12	-1.10659	0.219707	-5.03667	4.73707e-07	4.16362e-05	930	831	737	135	250	382
FBti0020205	1597.61	-0.570691	0.113935	-5.0089	5.47417e-07	4.72622e-05	2493	2155	2268	411	1741	1772
FBti0020127	212.358	1.15118	0.238687	4.82297	1.41436e-06	0.000113659	113	171	134	144	283	403
FBti0019132	261.676	-0.85713	0.178887	-4.79145	1.65578e-06	0.000130269	454	363	415	67	190	278
FBti0059648	13.4603	-1.4953	0.312188	-4.78976	1.66981e-06	0.00013046	32	37	23	0	2	5
FBti0019383	645.283	-0.611222	0.128383	-4.76092	1.9271e-06	0.000147992	929	1112	828	141	718	744
FBti0019619	23.3226	-1.40539	0.296643	-4.73767	2.16192e-06	0.000163789	53	40	46	2	13	11
FBti0019154	91.4171	-1.18036	0.249446	-4.73192	2.22404e-06	0.00016793	213	163	117	12	69	74
FBti0102096	405.227	0.501275	0.106522	4.70582	2.5285e-06	0.000187151	448	413	342	168	587	684
FBti0062048	185.688	0.719031	0.153293	4.69057	2.72443e-06	0.000199509	163	164	172	71	286	378
FBti0102119	2825.42	0.399837	0.0858216	4.65894	3.17848e-06	0.000227768	3071	3349	2408	1052	4164	4706
FBti0020172	8.81351	-1.39687	0.30168	-4.63031	3.6511e-06	0.000256729	19	26	19	0	0	0
FBti0019738	294.133	-0.780453	0.173857	-4.48906	7.15397e-06	0.000459918	365	510	485	78	237	310
FBti0102097	268.193	0.687826	0.153905	4.46915	7.85302e-06	0.000493578	215	263	252	103	397	553
FBti0019385	793.253	0.539128	0.12329	4.37284	1.22643e-05	0.000733932	712	800	801	299	1127	1526
FBti0019527	53.1086	1.1001	0.251683	4.37096	1.23703e-05	0.000738311	37	43	25	32	78	110
FBti0019200	3226.21	-0.98963	0.227953	-4.34138	1.4159e-05	0.000831835	6145	4710	5233	416	2909	3460
FBti0019121	447.542	-1.24004	0.28901	-4.29064	1.78159e-05	0.000992268	945	786	785	26	374	314
FBti0062861	855.525	0.593389	0.139248	4.26137	2.03176e-05	0.00112326	690	1049	709	347	1310	1521
FBti0020211	754.624	0.578861	0.136945	4.22697	2.36862e-05	0.00127503	859	725	576	332	1109	1273
FBti0019185	6720.63	-0.300956	0.0719313	-4.18394	2.86502e-05	0.00150259	9322	9600	7990	1866	8034	8872
FBti0019198	7.34388	-1.22741	0.295298	-4.15651	3.23144e-05	0.00168311	20	17	16	0	0	0
FBti0062193	9.25098	-1.27777	0.307709	-4.15253	3.28824e-05	0.00170875	24	25	15	0	1	3
FBti0019414	117.051	1.09916	0.264888	4.14954	3.33147e-05	0.00172722	112	54	60	66	188	246
FBti0019704	198.494	-1.10967	0.268018	-4.14028	3.46887e-05	0.00179021	423	399	240	39	176	91
FBti0060635	677.799	0.411428	0.0999977	4.11438	3.88228e-05	0.00195863	760	720	604	288	964	1048
FBti0019115	764.516	-0.536936	0.13135	-4.08783	4.35419e-05	0.00213916	1232	1006	1037	228	715	894
FBti0019250	329.803	1.16459	0.285209	4.08326	4.44075e-05	0.00215813	99	229	243	111	728	862
FBti0019596	402.495	0.450323	0.11152	4.03806	5.38956e-05	0.0025477	406	406	406	158	633	625
FBti0019109	1964.07	-1.05022	0.261604	-4.01453	5.95636e-05	0.00276909	3649	3398	3152	436	692	2124
FBti0020171	123.885	-1.02669	0.259026	-3.96364	7.38155e-05	0.0033285	199	292	160	18	124	84
FBti0019126	313.698	0.531778	0.134573	3.9516	7.76299e-05	0.00347267	321	321	272	135	403	587
FBti0019526	47.3908	-1.23352	0.312201	-3.95106	7.78072e-05	0.00347369	96	122	77	4	6	36
FBti0020320	395.775	-0.376705	0.0958281	-3.93105	8.45752e-05	0.0037078	560	554	499	123	404	508
FBti0060345	510.324	0.447959	0.114161	3.92394	8.7114e-05	0.00377679	538	550	459	213	652	916
FBti0020257	64.0783	-1.05526	0.269063	-3.92198	8.78245e-05	0.00379799	125	132	79	15	51	34
FBti0019915	1138.46	0.488103	0.124613	3.91694	8.96807e-05	0.00385813	1314	1087	1000	409	1792	1991
FBti0019574	710.196	0.408346	0.104719	3.89944	9.64149e-05	0.00406261	693	790	711	276	929	1282
FBti0020096	9.46711	-1.11803	0.28772	-3.88583	0.000101982	0.00425731	22	15	30	0	0	0
FBti0019522	153.064	-1.21002	0.312126	-3.87672	0.000105876	0.00438603	131	378	412	27	59	30
FBti0020111	32.0513	1.20176	0.310234	3.87371	0.00010719	0.00440123	10	19	11	29	40	61
FBti0018873	100.134	1.08564	0.281074	3.86247	0.000112249	0.00455082	41	82	62	73	158	155
FBti0019104	303.137	-1.0743	0.281241	-3.81984	0.00013354	0.00526233	603	675	368	24	242	297
FBti0061966	69.3845	-0.733769	0.193452	-3.79302	0.000148823	0.00572423	106	113	101	17	69	66
FBti0020081	127.693	1.10906	0.293478	3.77903	0.00015744	0.00597396	38	108	75	92	182	243
FBti0060280	205.996	0.726747	0.195524	3.71693	0.000201661	0.00735015	179	213	143	115	299	316
FBti0062845	132.637	0.644706	0.174737	3.68959	0.000224616	0.00798433	114	124	127	52	238	216
FBti0019224	416.333	-0.926224	0.253168	-3.65854	0.000253655	0.00882148	492	771	799	125	248	305
FBti0019531	145.118	-1.10029	0.302129	-3.64178	0.000270755	0.00927285	363	241	203	38	39	85
FBti0020423	20.8582	-1.0065	0.277086	-3.63244	0.000280755	0.00958616	91	18	40	0	0	0
FBti0019322	1768.45	0.310745	0.0857287	3.62475	0.00028924	0.00986088	1982	2071	1639	717	2266	2870
FBti0019152	471.878	-0.429279	0.119253	-3.59973	0.000318551	0.0106838	592	711	666	128	484	624
FBti0019819	31.2794	1.03389	0.288792	3.58003	0.000343551	0.0113513	21	17	21	14	77	52
FBti0059736	105.989	-0.704526	0.198292	-3.55297	0.000380904	0.0123142	171	185	128	31	80	118
FBti0060413	280.776	0.509651	0.143501	3.55155	0.000382967	0.0123632	298	258	267	116	374	520
FBti0059745	183.394	0.976046	0.275765	3.53941	0.000401022	0.0128355	177	109	94	63	279	546
FBti0020164	245.285	-0.947213	0.268174	-3.53209	0.000412293	0.0131059	495	383	376	27	168	311
FBti0020036	20.3022	1.05487	0.299333	3.52409	0.000424945	0.0134293	5	2	5	25	26	25
FBti0018985	27.7104	-1.01046	0.286721	-3.5242	0.000424765	0.0134293	64	71	58	0	8	0
FBti0019541	182.978	0.89318	0.253677	3.52094	0.000430027	0.0135519	85	183	145	106	291	307
FBti0063660	371.148	0.431478	0.122653	3.51788	0.000435014	0.0136517	422	394	313	160	509	602
FBti0020153	898.746	0.348047	0.0998502	3.48569	0.000490867	0.0151094	1040	1028	800	311	1324	1520
FBti0059768	124.924	1.0624	0.308341	3.44555	0.000569903	0.0169622	87	96	18	68	240	284
FBti0019462	768.427	-0.653995	0.194743	-3.35824	0.000784415	0.0216566	1192	1250	1041	154	620	1122
FBti0019131	13.6654	-1.02794	0.308536	-3.33166	0.00086329	0.0232912	22	28	27	2	9	7
FBti0063148	25.5278	1.03629	0.312226	3.31905	0.000903234	0.0242526	16	17	3	15	44	65
FBti0019757	24.2755	-0.971513	0.294828	-3.29518	0.000983581	0.0260455	76	19	63	0	10	5
FBti0019144	175.513	-1.00099	0.306368	-3.26728	0.00108586	0.0279232	308	480	204	9	137	158
FBti0020170	120.936	-0.930033	0.286531	-3.24584	0.00117104	0.0296914	156	239	222	39	58	74
FBti0062383	410.809	-0.333036	0.10267	-3.24377	0.00117961	0.0298229	569	589	491	136	465	474
FBti0019122	302.214	0.786653	0.247284	3.18117	0.0014668	0.0356419	199	215	315	99	516	719
FBti0020321	875.982	0.392399	0.123432	3.17908	0.00147741	0.0358225	950	974	790	384	1068	1485
FBti0062382	472.411	-0.964714	0.305334	-3.15954	0.00158019	0.0379061	761	1007	803	127	324	107
FBti0059687	386.531	-0.598761	0.19052	-3.14277	0.00167357	0.0394728	718	590	412	112	331	443
FBti0062658	147.789	0.546497	0.17447	3.13232	0.0017343	0.0404809	159	167	104	57	226	268
FBti0020054	348.542	-0.732613	0.233988	-3.13098	0.00174222	0.0405398	699	519	415	98	214	405
FBti0060874	65.5791	-0.800723	0.26058	-3.07285	0.00212028	0.0469571	137	116	69	14	49	70
FBti0019678	104.575	-0.598359	0.201163	-2.9745	0.00293464	0.0610302	175	137	150	28	112	102
FBti0019628	478.844	-0.904663	0.306757	-2.94912	0.00318685	0.0649522	914	297	1276	93	330	292
FBti0019374	327.431	-0.730455	0.248235	-2.9426	0.00325474	0.0659179	533	493	505	103	319	191
FBti0059697	968.817	0.445963	0.151965	2.93464	0.00333939	0.0672988	1184	991	760	407	1485	1456
FBti0059715	182.504	0.819139	0.280658	2.91864	0.00351562	0.0699425	94	173	141	130	209	300
FBti0019842	26.375	-0.898388	0.311821	-2.8811	0.00396291	0.0762784	81	33	32	5	15	15
FBti0019425	668.253	0.584439	0.20358	2.87081	0.00409423	0.0779393	782	547	533	310	788	1331
FBti0018882	889.22	-0.610104	0.212793	-2.86712	0.00414225	0.0786539	1392	1421	1164	314	823	667
FBti0062480	44.9646	0.814052	0.284108	2.86529	0.00416622	0.0789757	49	33	19	23	74	87
FBti0019637	33.9776	-0.778999	0.273626	-2.84695	0.00441398	0.0818788	64	51	50	8	21	38
FBti0019504	260.173	0.389567	0.136969	2.84421	0.00445219	0.082181	299	266	249	88	375	473
FBti0019055	777.587	0.655628	0.23068	2.84215	0.00448098	0.082577	477	698	864	406	1163	1206
FBti0020425	140.931	-0.40246	0.142192	-2.83039	0.00464917	0.0847053	193	208	183	41	140	186
FBti0063624	369.24	0.532799	0.188405	2.82794	0.00468479	0.0852162	418	383	262	185	520	550
FBti0019030	10.9588	-0.880146	0.312085	-2.82021	0.00479919	0.0868757	23	23	19	0	8	8
FBti0020235	116.593	0.433415	0.154168	2.81132	0.00493383	0.0886709	127	117	112	43	176	198
FBti0020372	129.053	-0.660125	0.236862	-2.78696	0.0053205	0.0939076	240	189	170	22	112	178
FBti0060364	163.42	0.491653	0.176479	2.7859	0.00533797	0.0940561	182	156	147	58	225	329
FBti0063232	133.533	-0.51058	0.185336	-2.75489	0.00587114	0.0998913	220	194	157	43	138	133
FBti0019598	65.9565	-0.551205	0.202626	-2.72031	0.00652203	0.107512	95	102	88	21	66	65
FBti0019143	184.136	-0.597883	0.220712	-2.70888	0.00675112	0.110078	337	320	176	47	192	188
FBti0019258	214.707	-0.408778	0.151203	-2.70351	0.00686123	0.111389	289	299	295	70	195	277
FBti0019120	41.1321	-0.813203	0.301093	-2.70084	0.00691655	0.111822	106	63	42	10	24	35
FBti0019196	7.61054	-0.672488	0.249637	-2.69387	0.0070628	0.113496	11	10	32	0	0	0
FBti0060599	71.1666	-0.638413	0.23712	-2.69237	0.00709467	0.113726	81	128	116	17	62	83
FBti0019337	38.3958	0.820835	0.305777	2.68442	0.00726554	0.115862	29	18	4	36	45	68
FBti0019341	21.7441	-0.708413	0.264972	-2.67354	0.00750563	0.118932	46	44	57	0	9	0
FBti0060985	93.1505	0.637961	0.238903	2.67038	0.00757659	0.119888	82	112	57	41	122	196
FBti0061160	177.945	-0.596328	0.223902	-2.66334	0.00773694	0.121826	347	222	221	55	163	172
FBti0020073	294.419	0.459939	0.173393	2.65258	0.007988	0.124733	364	258	256	119	459	464
FBti0019455	85.1547	-0.761165	0.289556	-2.62873	0.00857047	0.130916	168	181	80	15	96	58
FBti0019457	7.93425	-0.804622	0.306537	-2.62488	0.00866806	0.131784	13	17	18	0	6	4
FBti0059671	7.22612	-0.637359	0.245389	-2.59735	0.00939474	0.139901	33	8	11	0	0	0
FBti0018972	214.153	-0.354915	0.136871	-2.59305	0.0095128	0.140913	294	307	273	62	266	239
FBti0063720	247.65	0.425778	0.165863	2.56705	0.0102568	0.147375	230	308	225	81	426	403
FBti0060924	30.5521	-0.653733	0.258026	-2.53359	0.01129	0.15818	52	48	41	8	26	32
FBti0019058	471.813	-0.455518	0.180928	-2.51768	0.0118129	0.162967	536	790	663	164	443	500
FBti0019299	251.795	-0.409968	0.163529	-2.507	0.012176	0.165943	399	374	273	83	236	310
FBti0019525	82.8135	0.702347	0.280372	2.50505	0.0122434	0.166657	67	46	84	43	159	112
FBti0063523	66.8558	-0.534573	0.213974	-2.4983	0.012479	0.16915	108	103	83	17	78	66
FBti0062656	79.5266	-0.749119	0.304336	-2.46149	0.0138362	0.18069	175	184	55	12	74	68
FBti0019551	755.806	-0.314165	0.128056	-2.45334	0.0141537	0.183346	1019	1030	982	234	955	818
FBti0020041	74.9605	0.747962	0.305711	2.44663	0.0144198	0.185695	87	34	39	37	85	202
FBti0061663	136.938	0.389761	0.160457	2.42907	0.0151376	0.191893	136	174	120	47	208	236
FBti0063229	40.2586	-0.663745	0.277474	-2.3921	0.0167522	0.204526	69	81	41	11	28	44
FBti0020260	133.924	-0.743039	0.311215	-2.38754	0.0169615	0.205964	306	127	289	12	35	186
FBti0019624	49.8465	-0.652515	0.273374	-2.38689	0.0169914	0.205994	102	58	71	13	47	44
FBti0019084	1730.35	-0.675653	0.283975	-2.37927	0.017347	0.208396	3084	4587	3070	407	295	137
FBti0019563	1351.27	-0.188031	0.0792118	-2.37378	0.0176071	0.21004	1879	1734	1593	419	1643	1796
FBti0018903	18.2469	-0.655118	0.278393	-2.35321	0.0186119	0.217778	57	39	21	0	2	17
FBti0019587	629.409	0.421045	0.179269	2.34867	0.0188404	0.219539	808	562	535	282	858	984
FBti0063181	21.3531	-0.683135	0.298192	-2.29092	0.0219681	0.242662	36	45	23	6	17	17
FBti0020116	10.6416	0.707647	0.310386	2.27989	0.022614	0.247369	5	5	8	7	24	13
FBti0061823	178.817	0.488516	0.214631	2.27607	0.0228417	0.24886	149	156	211	70	241	349
FBti0019000	127.762	0.701314	0.308912	2.27027	0.0231911	0.251967	30	125	66	125	194	92
FBti0020152	20.6792	-0.675994	0.298259	-2.26646	0.023423	0.253629	25	37	39	4	16	22
FBti0062576	19.7252	0.702372	0.310246	2.26392	0.023579	0.254339	18	7	16	10	29	45
FBti0019059	507.732	0.636376	0.282558	2.25219	0.0243102	0.259366	443	54	83	134	1083	1891
FBti0019136	507.732	0.636376	0.282558	2.25219	0.0243102	0.259366	443	54	83	134	1083	1891
FBti0059767	72.1797	-0.665765	0.299045	-2.2263	0.0259939	0.269286	129	118	109	5	82	83
FBti0059763	48.6571	-0.689353	0.310374	-2.22104	0.0263484	0.271459	124	57	66	9	55	23
FBti0019110	1035.02	0.337766	0.152314	2.21756	0.0265846	0.27252	1354	1001	922	369	1534	1710
FBti0019752	1473.69	-0.263548	0.118877	-2.21698	0.0266242	0.272677	2131	1908	1766	520	1615	1739
FBti0019900	92.1303	-0.446706	0.201489	-2.21703	0.0266211	0.272677	152	119	115	30	89	105
FBti0019137	1007.26	-0.62049	0.281143	-2.20703	0.0273119	0.277573	1929	2902	1379	262	176	82
FBti0059727	145.094	-0.573453	0.261271	-2.19486	0.0281736	0.283386	312	180	166	33	115	196
FBti0064064	38.0801	0.645328	0.294359	2.19232	0.0283566	0.284263	23	37	30	26	45	60
FBti0061999	16.7579	0.666316	0.304717	2.18667	0.0287667	0.28628	14	18	8	6	31	37
FBti0019193	218.809	0.501485	0.230417	2.17642	0.0295235	0.290345	40	0	18	125	385	851
FBti0020210	361.991	-0.310108	0.142994	-2.16868	0.0301069	0.292881	469	495	481	120	439	386
FBti0020055	19.8659	-0.676256	0.312192	-2.16616	0.0302992	0.294117	55	18	31	3	16	15
FBti0060690	29.4751	-0.622156	0.28769	-2.16259	0.0305724	0.295875	59	37	44	5	29	32
FBti0018906	241.292	-0.280096	0.129675	-2.15998	0.0307743	0.296527	316	377	269	77	253	326
FBti0020064	59.0127	-0.488182	0.22652	-2.15514	0.0311511	0.298777	102	84	69	17	54	72
FBti0060941	7.80196	0.61797	0.287138	2.15217	0.0313836	0.300016	2	7	1	7	9	16
FBti0019882	16.7152	0.656598	0.305356	2.15027	0.0315339	0.300782	15	12	11	9	20	38
FBti0059781	22.5151	-0.664263	0.31084	-2.13699	0.0325984	0.306646	44	30	37	7	8	22
FBti0018897	13.6302	-0.659949	0.310745	-2.12376	0.0336899	0.311444	23	26	20	3	6	16
FBti0020095	258.065	-0.51482	0.245249	-2.09917	0.0358015	0.322099	806	770	170	28	2	74
FBti0019611	42.1697	-0.516693	0.247542	-2.08729	0.0368616	0.328224	140	36	96	0	1	32
FBti0060897	83.6863	0.412393	0.19809	2.08185	0.0373564	0.331319	90	84	75	40	119	120
FBti0018921	141.374	0.609832	0.293551	2.07743	0.0377617	0.333642	132	75	143	52	158	395
FBti0062461	191.689	-0.269988	0.129977	-2.0772	0.0377829	0.333655	262	270	236	52	213	275
FBti0019210	27.6102	-0.441799	0.212817	-2.07596	0.0378976	0.333946	133	70	2	0	0	0
FBti0020103	512.545	-0.270299	0.130548	-2.0705	0.0384054	0.335832	619	729	678	163	642	579
FBti0018963	181.423	0.550774	0.267963	2.05541	0.0398396	0.342255	200	139	157	42	340	406
FBti0019067	19.8039	-0.632676	0.308886	-2.04825	0.0405351	0.346009	34	40	35	0	13	26
FBti0018964	111.992	0.601578	0.294287	2.04419	0.0409351	0.348258	97	31	42	119	30	224
FBti0059698	286.927	-0.335538	0.165111	-2.0322	0.0421339	0.354281	449	332	379	85	326	352
FBti0020125	92.5241	-0.407465	0.200758	-2.02963	0.0423939	0.356073	137	126	129	20	116	112
FBti0059700	9.18888	0.629846	0.310618	2.02772	0.0425892	0.357147	3	6	9	4	18	20
FBti0062666	239.513	0.323972	0.162296	1.99619	0.0459135	0.371688	296	249	211	104	298	386
FBti0020093	51.9967	-0.52764	0.265478	-1.98751	0.0468658	0.375388	111	141	71	10	0	26
FBti0060504	51.7719	-0.597452	0.302529	-1.97486	0.0482842	0.380896	122	76	54	6	59	55
FBti0062111	50.8826	0.426246	0.217186	1.96258	0.0496948	0.386914	54	50	50	18	76	92
FBti0020137	201.879	-0.349255	0.178387	-1.95785	0.050247	0.389115	333	239	252	58	218	261
FBti0060670	6.75499	-0.602636	0.308469	-1.95364	0.0507442	0.391026	15	9	12	1	5	5
FBti0060671	6.75499	-0.602636	0.308469	-1.95364	0.0507442	0.391026	15	9	12	1	5	5
FBti0019141	39.056	-0.462858	0.237088	-1.95226	0.050907	0.39161	63	114	81	7	0	1
FBti0019396	503.105	-0.270078	0.13857	-1.94904	0.0512909	0.393621	685	596	698	162	555	644
FBti0020185	16.3816	-0.576701	0.295975	-1.94848	0.0513578	0.393865	48	34	13	0	13	15
FBti0019384	50.7194	-0.574648	0.295573	-1.94418	0.0518734	0.395245	80	93	110	0	57	32
FBti0018969	21.5862	0.516093	0.265405	1.94455	0.0518296	0.395245	7	19	0	13	64	29
FBti0019369	29.9756	0.519493	0.269072	1.93068	0.0535225	0.402375	0	17	19	19	42	87
FBti0019439	175.963	-0.556941	0.288515	-1.93037	0.0535608	0.402409	407	337	263	5	245	20
FBti0061065	15.6741	0.592353	0.307671	1.92528	0.0541941	0.404855	12	9	15	9	25	25
FBti0063446	163.79	-0.3326	0.173213	-1.92017	0.0548359	0.407237	251	213	209	38	197	223
FBti0018884	229.523	-0.470257	0.246266	-1.90955	0.0561911	0.411924	365	342	280	91	217	172
FBti0059779	21.6167	-0.582148	0.307766	-1.89153	0.0585539	0.422283	32	54	32	0	23	21
FBti0019880	100.205	-0.300893	0.15931	-1.88873	0.0589286	0.423221	142	139	123	29	113	131
FBti0063929	5.48845	-0.544711	0.289308	-1.88281	0.0597265	0.425691	10	10	12	0	6	2
FBti0018931	14.6533	-0.570652	0.305682	-1.86682	0.0619271	0.432852	28	27	16	3	13	15
FBti0060793	23.621	0.456035	0.244416	1.86582	0.0620672	0.433449	19	2	0	22	28	54
FBti0019232	10.7385	-0.580906	0.311898	-1.86249	0.0625345	0.434823	23	19	12	2	9	10
FBti0060366	40.6389	0.436316	0.235107	1.85582	0.0634794	0.438858	0	3	25	41	24	114
FBti0019403	209.965	-0.445523	0.242069	-1.84048	0.0656974	0.447685	630	593	144	27	90	2
FBti0020436	102.288	-0.302282	0.164378	-1.83894	0.0659239	0.448685	149	144	121	29	111	140
FBti0060871	68.2244	-0.458506	0.24942	-1.83829	0.0660201	0.448945	118	88	93	12	84	84
FBti0019523	395.685	0.447077	0.24364	1.83499	0.066507	0.450745	347	540	284	207	404	699
FBti0059731	109.207	-0.358485	0.195531	-1.83339	0.0667446	0.451675	146	156	152	25	145	128
FBti0063425	202.179	-0.341884	0.186627	-1.83191	0.0669646	0.452351	320	267	248	44	237	291
FBti0019776	501.679	-0.564096	0.312281	-1.80638	0.0708596	0.465386	896	926	673	164	510	89
FBti0019588	62.328	0.492237	0.272563	1.80596	0.0709252	0.465545	37	83	55	28	80	121
FBti0059885	555.708	-0.203728	0.113698	-1.79183	0.0731597	0.473205	675	819	649	202	596	710
FBti0019893	94.6962	0.545911	0.305015	1.78979	0.0734885	0.473936	114	98	30	53	157	131
FBti0059704	414.921	-0.192565	0.10769	-1.78814	0.0737542	0.474562	590	535	471	139	485	535
FBti0059759	65.1041	0.412659	0.23093	1.78694	0.0739471	0.475259	62	79	52	32	77	110
FBti0062335	25.3866	0.511225	0.28668	1.78326	0.0745441	0.477064	22	18	28	11	37	48
FBti0062103	176.169	-0.228864	0.128793	-1.77699	0.0755698	0.480474	233	243	217	51	222	224
FBti0060602	26.1493	-0.540147	0.304011	-1.77673	0.075612	0.480606	32	53	41	3	22	38
FBti0020453	395.431	-0.17327	0.0976995	-1.7735	0.0761455	0.483178	528	537	466	112	473	573
FBti0019448	127.962	0.417893	0.236591	1.76631	0.077344	0.486258	138	92	147	51	208	195
FBti0019057	5.53755	0.334514	0.18954	1.76488	0.0775845	0.48648	0	0	0	7	1	17
FBti0019660	5.53755	0.334514	0.18954	1.76488	0.0775845	0.48648	0	0	0	7	1	17
FBti0019114	389.543	0.299517	0.169732	1.76465	0.0776223	0.48648	517	359	369	150	527	636
FBti0019442	5.53755	0.334514	0.18954	1.76488	0.0775845	0.48648	0	0	0	7	1	17
FBti0019446	5.53755	0.334514	0.18954	1.76488	0.0775845	0.48648	0	0	0	7	1	17
FBti0020222	12.6024	0.54583	0.309462	1.7638	0.0777651	0.487136	12	9	9	7	16	25
FBti0018971	72.1622	-0.486431	0.276484	-1.75934	0.0785191	0.489814	251	118	51	0	55	65
FBti0062831	46.5015	-0.400495	0.227915	-1.75721	0.0788821	0.491261	66	63	67	12	53	55
FBti0019296	190.216	-0.273232	0.156094	-1.75043	0.0800438	0.494474	296	254	206	61	208	246
FBti0059831	150.885	-0.420435	0.240189	-1.75043	0.0800434	0.494474	262	159	212	48	125	194
FBti0019514	13.1882	0.544158	0.31108	1.74925	0.0802474	0.494665	15	11	6	6	19	29
FBti0019625	588.845	0.277484	0.159278	1.74214	0.0814846	0.4989	795	584	532	208	834	970
FBti0060854	91.2815	-0.379366	0.21787	-1.74125	0.0816395	0.499177	123	138	122	23	80	142
FBti0063242	340.406	-0.267758	0.153956	-1.73919	0.0820019	0.500305	529	462	373	88	396	490
FBti0062820	22.9973	-0.476791	0.274462	-1.73719	0.0823545	0.501504	19	38	73	0	8	30
FBti0060514	8.64232	-0.54046	0.311318	-1.73604	0.0825566	0.50163	12	21	12	1	9	7
FBti0061411	9.72555	-0.541971	0.312285	-1.7355	0.0826524	0.50172	20	13	15	2	6	11
FBti0019380	391.487	0.320512	0.184888	1.73355	0.0829985	0.501799	432	336	462	141	612	600
FBti0060444	25.0198	-0.489644	0.282793	-1.73146	0.0833702	0.502982	39	40	30	9	23	22
FBti0061406	79.7059	-0.374912	0.217344	-1.72497	0.0845327	0.506678	114	116	105	19	74	123
FBti0064236	5.72479	-0.487802	0.284846	-1.71251	0.0868025	0.51304	7	8	15	2	2	2
FBti0020011	140.489	0.532474	0.311231	1.71086	0.0871064	0.513891	67	80	155	134	123	135
FBti0061094	15.4371	-0.511384	0.299022	-1.71019	0.0872314	0.514359	24	28	19	4	15	15
FBti0061930	543.738	0.327332	0.1917	1.70752	0.0877257	0.515921	647	497	555	262	723	720
FBti0059774	245.492	-0.39346	0.231103	-1.70253	0.0886555	0.518925	453	362	220	82	255	256
FBti0060577	31.8683	-0.479634	0.282219	-1.69951	0.0892237	0.520223	56	54	32	9	36	28
FBti0061721	8.77192	-0.527298	0.311259	-1.69408	0.09025	0.522533	15	10	18	2	7	7
FBti0061471	17.5963	-0.52614	0.3115	-1.68905	0.0912092	0.525153	24	36	25	4	22	9
FBti0020386	997.975	0.196445	0.116609	1.68465	0.0920562	0.52801	1285	1107	954	392	1282	1502
FBti0018958	101.701	-0.326539	0.19425	-1.68102	0.0927583	0.529735	167	378	182	0	0	24
FBti0062175	55.7922	0.431582	0.256799	1.68062	0.0928361	0.52991	69	63	35	19	86	106
FBti0060653	308.704	-0.248318	0.148085	-1.67686	0.0935697	0.532476	475	386	362	84	381	413
FBti0020328	317.2	0.19662	0.117484	1.67359	0.0942118	0.53401	392	359	311	121	398	505
FBti0019407	29.4872	0.359214	0.216595	1.65846	0.0972247	0.541901	13	3	4	24	0	129
FBti0020236	15.2999	-0.502457	0.303461	-1.65576	0.0977713	0.543332	23	24	22	5	10	17
FBti0019461	774.063	-0.184899	0.112546	-1.64287	0.100409	0.549176	1139	954	886	246	914	1038
FBti0061658	34.6422	-0.442193	0.270052	-1.63744	0.101539	0.553204	50	64	40	7	44	37
FBti0020438	10.844	-0.508308	0.311942	-1.62949	0.103208	0.557707	24	11	17	3	8	9
FBti0020203	79.6998	0.455136	0.279679	1.62735	0.103662	0.558415	102	82	42	42	118	109
FBti0019963	19.3028	-0.494453	0.305983	-1.61595	0.106105	0.563401	50	27	23	2	7	31
FBti0020294	23.9204	0.444438	0.276853	1.60532	0.108423	0.56709	22	25	22	9	43	37
FBti0061007	10.6401	-0.482716	0.300594	-1.60587	0.108301	0.56709	33	9	14	1	9	10
FBti0018929	8.45254	-0.497951	0.311202	-1.60009	0.109579	0.569795	18	16	8	2	7	7
FBti0059645	334.942	0.193084	0.120709	1.59958	0.109693	0.570022	413	372	346	113	437	563
FBti0059667	128.244	-0.26489	0.165667	-1.59893	0.109836	0.570131	175	159	175	37	144	175
FBti0018899	9.10956	-0.498246	0.311937	-1.59727	0.110206	0.57137	20	16	9	2	7	9
FBti0059696	173.436	-0.314858	0.197757	-1.59215	0.111351	0.573869	283	251	178	44	182	258
FBti0060675	9.71939	-0.492165	0.309327	-1.59108	0.111591	0.574578	17	13	16	4	4	7
FBti0019468	292.857	0.287375	0.180686	1.59047	0.111729	0.574896	17	0	0	143	625	1192
FBti0059701	20.2301	0.496179	0.312099	1.58981	0.111877	0.575527	25	6	16	10	30	41
FBti0019476	19.3792	0.489805	0.308618	1.58709	0.112493	0.576714	12	22	16	9	20	47
FBti0019234	363.78	0.224494	0.141485	1.58669	0.112582	0.576751	441	391	378	122	459	653
FBti0019612	175.687	-0.359806	0.227868	-1.57901	0.114333	0.582433	448	335	314	0	31	170
FBti0019445	22.9417	-0.334179	0.212287	-1.57418	0.115445	0.586372	32	16	95	0	0	19
FBti0020121	266.031	0.415598	0.264172	1.57321	0.115671	0.586818	222	386	183	144	267	453
FBti0063956	156.034	-0.330237	0.209927	-1.57311	0.115695	0.586818	196	236	196	63	158	151
FBti0019112	127.679	-0.4891	0.312194	-1.56665	0.117196	0.589807	233	299	96	45	124	37
FBti0060077	122.265	-0.430388	0.275922	-1.55982	0.118803	0.593909	189	145	197	17	141	182
FBti0060892	17.1826	-0.341944	0.219554	-1.55744	0.119365	0.594648	64	24	22	0	15	0
FBti0019473	493.131	0.458104	0.294735	1.55429	0.120115	0.595968	86	187	662	332	711	872
FBti0059782	24.8568	-0.442543	0.284971	-1.55294	0.120437	0.596642	41	30	37	7	21	31
FBti0062706	22.7125	0.45443	0.292946	1.55124	0.120844	0.597913	23	18	22	9	44	32
FBti0019347	171.485	0.389062	0.251669	1.54593	0.122122	0.60076	225	149	136	94	208	236
FBti0019483	33.0216	-0.459445	0.297475	-1.54448	0.122471	0.601817	52	50	50	3	38	47
FBti0019789	6.05827	0.459814	0.298136	1.5423	0.123001	0.602936	7	3	2	4	8	12
FBti0064154	381.497	0.145348	0.0944823	1.53836	0.12396	0.605696	457	440	415	129	515	591
FBti0061671	6.2933	0.467049	0.30503	1.53116	0.12573	0.609077	6	6	2	3	9	15
FBti0020446	26.6844	-0.477206	0.311863	-1.53018	0.125973	0.609557	25	50	50	7	12	37
FBti0063240	381.682	-0.135492	0.0891049	-1.52059	0.128363	0.615314	509	507	429	125	451	528
FBti0060993	193.306	0.403644	0.267124	1.51107	0.13077	0.621975	213	168	182	114	173	313
FBti0020323	45.3546	-0.424795	0.281799	-1.50744	0.131699	0.623077	78	86	38	10	49	56
FBti0019307	166.861	0.189492	0.125827	1.50597	0.132074	0.623172	186	204	171	62	214	265
FBti0019129	166.861	0.189492	0.125827	1.50597	0.132074	0.623172	186	204	171	62	214	265
FBti0019387	166.861	0.189492	0.125827	1.50597	0.132074	0.623172	186	204	171	62	214	265
FBti0019435	26.3744	-0.468083	0.310866	-1.50574	0.132134	0.623172	32	42	44	12	15	18
FBti0019467	166.861	0.189492	0.125827	1.50597	0.132074	0.623172	186	204	171	62	214	265
FBti0020289	32.9008	0.464839	0.309583	1.5015	0.133226	0.625481	38	25	12	28	42	29
FBti0063184	64.3465	-0.324666	0.216485	-1.49971	0.133689	0.626563	97	84	82	18	82	71
FBti0060870	18.6482	-0.467708	0.312141	-1.49839	0.134033	0.627653	48	25	16	4	18	18
FBti0060616	48.956	0.356675	0.239631	1.48844	0.136636	0.634038	62	45	42	21	69	77
FBti0020422	146.597	-0.322386	0.216922	-1.48619	0.13723	0.635074	262	179	161	37	166	201
FBti0020189	121.893	-0.265788	0.179764	-1.47854	0.139262	0.640018	233	274	336	0	31	0
FBti0062777	9.61543	0.459022	0.310951	1.47619	0.139894	0.641219	11	9	4	3	15	25
FBti0020046	65.0857	-0.455675	0.310042	-1.46972	0.141637	0.644466	154	110	39	22	43	64
FBti0063098	30.8411	0.367619	0.251715	1.46046	0.144165	0.649499	34	33	27	12	46	51
FBti0059760	153.486	-0.251402	0.172345	-1.45871	0.144645	0.65054	206	201	192	56	143	208
FBti0060743	18.0558	-0.443804	0.304317	-1.45836	0.144742	0.650608	36	24	20	6	15	18
FBti0018987	199.536	0.364255	0.251127	1.45048	0.146924	0.654422	211	270	130	107	232	286
FBti0020410	480.836	-0.153382	0.105953	-1.44764	0.147719	0.656073	631	644	555	160	511	707
FBti0019093	22.0584	-0.449232	0.311896	-1.44032	0.149776	0.658118	33	45	29	1	25	31
FBti0019344	451.778	-0.414066	0.287331	-1.44108	0.149562	0.658118	730	716	534	51	485	778
FBti0060035	7.43063	-0.418162	0.290358	-1.44016	0.149821	0.658118	12	13	13	2	8	1
FBti0059777	770.755	-0.166381	0.115422	-1.4415	0.149443	0.658118	1076	1021	854	257	806	1128
FBti0019061	1338.22	0.194798	0.136015	1.43218	0.152093	0.660609	1749	1530	1234	425	2006	2092
FBti0060474	211.475	0.172532	0.120498	1.43183	0.152193	0.660718	258	242	220	72	297	322
FBti0020056	8.50118	-0.405503	0.283357	-1.43107	0.152411	0.660942	6	26	15	0	7	10
FBti0060253	150.825	0.251342	0.176079	1.42744	0.153452	0.661626	178	166	141	70	186	215
FBti0060829	753.219	0.270614	0.189598	1.4273	0.153492	0.661626	1026	826	592	335	982	1061
FBti0059673	12.0662	0.437733	0.306788	1.42683	0.15363	0.661626	11	11	10	6	18	20
FBti0059796	43.0592	0.343266	0.240775	1.42567	0.153962	0.662288	49	48	35	19	53	74
FBti0019485	46.3245	-0.40318	0.283741	-1.42094	0.155333	0.663846	79	60	65	6	56	66
FBti0059702	95.7982	-0.429536	0.302361	-1.42061	0.155431	0.664012	221	156	57	26	95	99
FBti0062857	37.582	-0.334427	0.235557	-1.41973	0.155687	0.664668	51	57	48	10	43	47
FBti0059915	40.4851	0.388666	0.274047	1.41825	0.156119	0.665434	47	47	25	20	60	56
FBti0020021	458.953	-0.359058	0.254259	-1.41217	0.157899	0.66791	980	384	1157	5	148	681
FBti0060634	15.0321	-0.430336	0.305239	-1.40983	0.158589	0.668995	23	27	20	2	15	21
FBti0063422	13.7034	-0.438941	0.311634	-1.40852	0.158978	0.669381	28	21	16	2	18	12
FBti0019205	28.6502	-0.394871	0.280835	-1.40606	0.159707	0.670843	86	46	23	0	38	21
FBti0060827	26.4517	0.420895	0.300097	1.40253	0.160757	0.672644	40	10	9	10	77	28
FBti0018949	16.8728	-0.359751	0.256588	-1.40206	0.160898	0.672805	48	27	20	3	0	20
FBti0064021	15.2292	0.435462	0.310961	1.40037	0.161401	0.673765	12	20	8	8	27	20
FBti0060437	75.3091	-0.351378	0.250987	-1.39998	0.161518	0.67402	123	133	166	19	53	0
FBti0019499	6.5512	0.2352	0.16819	1.39842	0.161988	0.674854	0	0	1	9	15	0
FBti0018905	17.9298	-0.305662	0.218617	-1.39816	0.162065	0.674924	38	35	37	0	20	0
FBti0018951	2416.46	0.434585	0.311495	1.39516	0.162967	0.677408	1958	3067	1412	1768	3188	2173
FBti0060540	33.6997	0.422577	0.303168	1.39387	0.163356	0.677707	19	20	34	32	17	47
FBti0062421	16.4969	0.42145	0.302409	1.39364	0.163425	0.677707	19	16	11	7	30	24
FBti0063980	8.59531	0.403414	0.289527	1.39336	0.163512	0.677707	2	13	4	2	20	21
FBti0059773	103.805	-0.31261	0.224278	-1.39385	0.163362	0.677707	174	130	114	38	95	128
FBti0020092	8.80824	0.224003	0.160989	1.39142	0.164097	0.678387	0	0	0	0	44	26
FBti0019037	9.81264	0.434489	0.312285	1.39132	0.164127	0.678387	8	8	8	6	11	18
FBti0059668	240.91	-0.20681	0.148899	-1.38893	0.164854	0.679374	323	318	303	64	267	375
FBti0019566	69.5553	0.353156	0.254572	1.38725	0.165365	0.679861	0	61	52	36	172	117
FBti0062825	646.791	-0.268355	0.193974	-1.38346	0.166525	0.682262	978	843	746	263	616	702
FBti0061943	9.07641	-0.43032	0.311974	-1.37935	0.167788	0.684196	11	16	17	1	9	11
FBti0019178	215.498	-0.42391	0.308113	-1.37583	0.168875	0.68602	255	479	254	34	107	431
FBti0019040	215.498	-0.42391	0.308113	-1.37583	0.168875	0.68602	255	479	254	34	107	431
FBti0018930	5.96245	0.420996	0.30649	1.37361	0.169564	0.686591	3	7	4	3	9	12
FBti0063494	22.8873	-0.378586	0.276029	-1.37154	0.170206	0.68733	29	38	31	6	24	28
FBti0019687	17.5855	0.328341	0.239675	1.36994	0.170706	0.68787	0	5	19	16	13	39
FBti0062216	6.8984	-0.42067	0.307485	-1.3681	0.171281	0.689074	16	9	8	2	5	6
FBti0062000	40.0796	0.381104	0.278825	1.36682	0.171682	0.689109	43	31	46	11	67	78
FBti0063710	12.1839	-0.42469	0.310807	-1.36641	0.17181	0.689109	21	21	13	4	8	14
FBti0019472	12.3679	0.42198	0.30939	1.36391	0.172596	0.690292	17	6	6	8	16	20
FBti0064070	9.27077	0.422108	0.312251	1.35183	0.176431	0.696606	9	8	8	2	19	20
FBti0060200	298.109	0.317338	0.234958	1.35062	0.176819	0.696899	340	345	261	72	424	661
FBti0062301	11.2202	-0.41816	0.309734	-1.35006	0.176997	0.697046	19	18	15	2	10	15
FBti0061415	34.2378	0.37329	0.277456	1.3454	0.178496	0.698894	25	41	38	10	56	65
FBti0019153	144.088	-0.29699	0.220907	-1.34441	0.178816	0.699261	205	252	134	42	137	213
FBti0060482	45.6436	0.311917	0.232355	1.34241	0.179462	0.699805	51	52	43	15	61	87
FBti0064195	10.7654	0.338102	0.251918	1.34211	0.179561	0.699805	8	0	9	7	8	33
FBti0061147	11.5776	0.417814	0.311883	1.33965	0.18036	0.700814	8	9	12	7	16	17
FBti0061900	17.6487	-0.413666	0.309605	-1.33611	0.181514	0.702436	19	25	36	3	19	21
FBti0019371	24.8367	0.209158	0.156618	1.33546	0.181725	0.702593	0	0	0	28	84	0
FBti0064187	33.7152	-0.380186	0.284752	-1.33515	0.181827	0.702593	46	59	42	7	49	31
FBti0063808	8.1636	0.33197	0.248854	1.334	0.182205	0.703101	0	12	2	4	19	16
FBti0062381	12.2174	0.415506	0.311719	1.33295	0.182548	0.70346	10	13	8	6	10	32
FBti0019184	57.949	-0.373215	0.280479	-1.33063	0.18331	0.704334	81	65	150	0	53	77
FBti0020158	44.7529	0.321374	0.242215	1.32681	0.18457	0.706535	58	12	0	38	65	69
FBti0059778	62.3012	-0.378251	0.28523	-1.32613	0.184797	0.707001	54	135	80	18	71	63
FBti0062755	11.2103	-0.293775	0.221666	-1.32531	0.185069	0.707206	27	17	23	0	0	16
FBti0020301	13.872	-0.412125	0.311549	-1.32283	0.185894	0.707761	30	19	16	2	13	19
FBti0063128	8.91569	0.405853	0.30676	1.32303	0.185825	0.707761	8	9	6	1	18	25
FBti0061829	10.8779	0.411749	0.312255	1.31863	0.187292	0.709711	8	7	12	6	19	14
FBti0020022	15.2465	0.256066	0.194695	1.31522	0.188438	0.710487	13	0	0	17	8	35
FBti0019159	705.407	0.248201	0.188688	1.3154	0.188374	0.710487	974	820	527	277	876	1168
FBti0060356	5.55842	0.202322	0.153858	1.31499	0.188514	0.710487	0	0	0	0	29	15
FBti0059721	10.0103	0.404357	0.30831	1.31153	0.18968	0.712046	10	6	9	3	11	31
FBti0060695	13.2387	-0.398151	0.303839	-1.3104	0.190059	0.712064	21	20	18	3	15	14
FBti0019550	6.1563	-0.366247	0.280186	-1.30715	0.19116	0.714145	9	18	7	0	3	10
FBti0019102	17.7527	-0.202277	0.154938	-1.30553	0.191711	0.71478	72	61	0	0	0	0
FBti0019194	27.2933	0.200267	0.153714	1.30285	0.192624	0.714997	0	0	0	44	43	0
FBti0061720	25.3803	-0.368842	0.282897	-1.3038	0.1923	0.714997	37	37	37	4	30	35
FBti0060638	12.0319	0.400199	0.307551	1.30124	0.193175	0.71585	11	15	3	8	17	17
FBti0061344	30.6879	0.345795	0.26587	1.30062	0.193389	0.716289	35	34	27	9	54	51
FBti0020033	312.838	0.394299	0.303642	1.29856	0.194093	0.717125	247	162	446	196	395	368
FBti0062138	18.593	-0.393793	0.303599	-1.29708	0.194603	0.717775	33	20	27	6	19	17
FBti0019368	7.05683	0.399653	0.309117	1.29288	0.196051	0.719458	7	6	4	4	13	9
FBti0019043	386.836	-0.286935	0.221996	-1.29252	0.196176	0.71974	690	553	332	113	387	556
FBti0020209	217.675	-0.16841	0.130375	-1.29173	0.19645	0.719884	280	268	280	73	249	293
FBti0019884	17.2465	0.401636	0.312113	1.28683	0.198154	0.721937	21	20	6	7	24	37
FBti0019436	31.969	-0.396581	0.308328	-1.28623	0.198363	0.722052	22	51	76	9	11	44
FBti0060105	6.69246	0.379348	0.295706	1.28286	0.199543	0.723411	2	10	4	2	12	17
FBti0019238	7.71043	-0.365423	0.285047	-1.28197	0.199852	0.72357	13	23	6	0	6	11
FBti0020283	58.0527	-0.287621	0.224503	-1.28115	0.200142	0.72404	80	74	77	20	53	79
FBti0019391	100.287	0.225187	0.175927	1.28	0.200545	0.72448	56	1	0	62	50	479
FBti0062988	7.77091	-0.384525	0.301317	-1.27615	0.201903	0.727233	12	8	17	2	3	10
FBti0060676	12.0032	-0.393275	0.308805	-1.27354	0.202826	0.728343	18	20	17	2	11	17
FBti0060436	178.278	-0.204792	0.161214	-1.27032	0.203972	0.729895	256	260	179	59	189	249
FBti0020282	36.6821	-0.339797	0.26769	-1.26937	0.20431	0.730176	65	43	45	10	43	42
FBti0019537	99.0783	0.379444	0.299131	1.26849	0.204623	0.730829	138	12	74	76	135	106
FBti0019003	35.4312	-0.355906	0.281746	-1.26321	0.206512	0.733386	65	37	46	11	38	38
FBti0061299	5.30433	0.363052	0.28738	1.26332	0.206476	0.733386	6	4	1	4	7	8
FBti0020259	163.713	-0.162082	0.128861	-1.2578	0.208465	0.7363	208	216	204	50	195	228
FBti0059672	781.613	0.224749	0.17904	1.2553	0.20937	0.73719	951	926	708	341	800	1316
FBti0020024	5.91119	0.185461	0.14818	1.25159	0.21072	0.738109	0	0	0	0	8	42
FBti0063337	5.80533	0.378302	0.302931	1.24881	0.211736	0.739946	5	7	2	3	8	12
FBti0019515	119.433	0.224912	0.180158	1.24841	0.21188	0.740069	153	132	107	49	147	189
FBti0020163	12.0945	-0.35427	0.284846	-1.24372	0.213601	0.74262	36	14	13	0	9	19
FBti0020192	81.2641	-0.248955	0.200253	-1.2432	0.213792	0.742941	113	115	101	18	97	122
FBti0019631	141.855	-0.197889	0.159315	-1.24212	0.214191	0.742944	540	428	47	0	0	47
FBti0059637	43.4258	-0.289863	0.233478	-1.2415	0.21442	0.742944	66	59	53	11	48	61
FBti0020118	360.386	-0.12973	0.105034	-1.23512	0.216785	0.745394	484	470	409	116	465	463
FBti0019465	98.5879	-0.353926	0.287404	-1.23146	0.218152	0.746647	205	80	130	25	109	120
FBti0060414	14.4697	-0.368765	0.301322	-1.22383	0.221018	0.749572	21	25	17	4	16	15
FBti0020288	80.8219	-0.272968	0.223259	-1.22265	0.221461	0.749954	113	96	116	21	83	123
FBti0019086	10.4454	-0.180287	0.147504	-1.22226	0.22161	0.749954	32	47	0	0	0	0
FBti0020072	14.0147	-0.179993	0.147258	-1.22229	0.221597	0.749954	0	26	71	0	0	0
FBti0019797	5.58102	0.368689	0.301558	1.22261	0.221476	0.749954	3	8	3	2	10	12
FBti0062477	29.8338	-0.3312	0.271682	-1.21907	0.222817	0.751402	47	50	29	8	34	36
FBti0062247	151.977	-0.185004	0.151791	-1.21881	0.222916	0.7515	219	187	177	51	177	197
FBti0060391	21.8456	-0.343642	0.282513	-1.21637	0.223843	0.75256	46	39	28	0	10	43
FBti0019817	15.7655	-0.376321	0.309713	-1.21506	0.224342	0.752716	26	29	15	5	10	21
FBti0020359	99.7412	0.303226	0.249408	1.21578	0.224069	0.752716	132	114	73	29	182	153
FBti0060873	43.1806	-0.33407	0.275516	-1.21252	0.225312	0.753547	69	62	48	15	30	62
FBti0061341	66.5715	0.25122	0.207759	1.20919	0.22659	0.75481	82	66	68	25	86	112
FBti0062608	29.458	-0.311478	0.257651	-1.20891	0.226696	0.754889	43	43	37	7	35	38
FBti0019357	727.58	-0.220807	0.182701	-1.20857	0.226828	0.755009	1252	878	728	218	852	981
FBti0060147	18.4197	0.370426	0.307081	1.20628	0.227709	0.755371	14	28	11	8	30	29
FBti0019117	60.5092	0.304196	0.252294	1.20572	0.227925	0.755743	55	0	52	30	126	119
FBti0019393	51.9488	-0.322475	0.267811	-1.20411	0.228547	0.75646	82	53	80	12	62	67
FBti0019149	28.3364	0.323526	0.269267	1.20151	0.229555	0.757451	31	29	25	14	35	44
FBti0020082	1090.69	-0.254772	0.212183	-1.20072	0.229861	0.757594	2002	1272	1070	384	1173	1274
FBti0019870	39.0511	0.322245	0.26871	1.19923	0.230439	0.758125	46	33	40	16	66	51
FBti0063118	389.522	0.14584	0.121915	1.19624	0.231602	0.759922	453	421	448	149	482	596
FBti0019092	134.206	-0.263544	0.220598	-1.19468	0.23221	0.761307	302	141	316	0	167	43
FBti0018866	60.4533	0.302643	0.25334	1.19461	0.232239	0.761307	71	45	0	38	98	115
FBti0060888	9.09795	0.169722	0.142684	1.1895	0.234242	0.763646	0	0	0	11	28	0
FBti0019207	7.86657	-0.170563	0.144056	-1.18401	0.236408	0.765019	31	28	0	0	0	0
FBti0019335	8.92359	0.36831	0.311659	1.18177	0.237297	0.76505	11	7	5	5	11	16
FBti0060285	8.0171	0.354471	0.30025	1.18059	0.237767	0.765747	6	4	8	6	6	15
FBti0061660	76.5488	-0.282864	0.240314	-1.17706	0.239172	0.767157	104	119	94	14	87	125
FBti0019402	34.0472	-0.320142	0.273249	-1.17161	0.241353	0.768186	44	93	42	0	15	67
FBti0062491	8.55726	-0.362546	0.310219	-1.16868	0.242533	0.768625	16	14	11	1	6	14
FBti0060499	1905.29	-0.0887214	0.0764152	-1.16104	0.245624	0.772477	2373	2396	2324	602	2279	2810
FBti0063274	14.7375	-0.356523	0.307223	-1.16047	0.245859	0.772477	21	29	16	3	19	15
FBti0020106	5.73666	0.261223	0.226268	1.15449	0.2483	0.775265	2	7	0	7	5	4
FBti0060381	28.5674	0.358833	0.311925	1.15038	0.249986	0.777853	26	12	39	12	36	60
FBti0059739	5.29044	0.181317	0.158183	1.14625	0.251692	0.77938	0	3	0	0	3	39
FBti0019397	189.734	0.327016	0.285983	1.14348	0.25284	0.781691	135	158	268	104	257	221
FBti0019906	121.942	-0.204773	0.179199	-1.14271	0.253159	0.781884	148	187	135	46	139	141
FBti0060660	13.0996	-0.328407	0.28771	-1.14145	0.253682	0.782223	23	28	16	0	7	26
FBti0063065	25.7458	0.34226	0.299891	1.14128	0.253752	0.782223	33	17	25	11	30	51
FBti0019493	19.196	0.347457	0.304866	1.1397	0.254409	0.782256	22	14	18	10	31	23
FBti0063471	7.91392	-0.354736	0.311247	-1.13973	0.254401	0.782256	14	12	9	3	7	6
FBti0062227	26.5689	-0.315877	0.277375	-1.13881	0.254784	0.782456	41	36	32	9	22	36
FBti0020207	9.16244	0.228692	0.200995	1.1378	0.255205	0.782941	12	0	0	4	21	24
FBti0060603	18.982	-0.329492	0.289961	-1.13633	0.255818	0.783988	40	30	25	0	12	37
FBti0019799	25.7781	0.35221	0.310906	1.13285	0.257277	0.785651	23	16	30	17	25	38
FBti0062229	9.38335	-0.327565	0.289164	-1.1328	0.257298	0.785651	16	13	18	0	16	6
FBti0060180	192.257	-0.184012	0.162501	-1.13237	0.257479	0.786096	230	278	226	74	189	256
FBti0019699	34.2821	0.283777	0.250658	1.13213	0.257579	0.786127	40	41	29	12	54	53
FBti0020415	14.7815	0.342181	0.302909	1.12965	0.258625	0.787429	14	16	14	5	28	22
FBti0018881	50.7174	0.215616	0.191874	1.12374	0.261124	0.789381	0	64	0	31	98	124
FBti0061026	10.2011	0.335455	0.299358	1.12058	0.262466	0.790702	9	9	6	8	5	20
FBti0062015	353.244	-0.163418	0.145952	-1.11967	0.262854	0.791234	412	503	439	110	485	414
FBti0019304	338.982	-0.103211	0.0923475	-1.11764	0.263722	0.791941	433	451	391	106	434	461
FBti0060975	28.0122	-0.338433	0.302972	-1.11704	0.263976	0.791942	47	35	41	3	38	38
FBti0063573	5.95136	-0.291306	0.261454	-1.11418	0.265203	0.794057	9	6	16	0	2	11
FBti0102112	71.6333	0.315692	0.285566	1.1055	0.268945	0.798338	71	115	39	24	103	137
FBti0020247	12.5219	0.336555	0.305736	1.1008	0.270982	0.799956	3	18	11	7	19	19
FBti0018893	86.2599	0.246822	0.22483	1.09782	0.272285	0.800978	113	88	78	35	96	154
FBti0060875	85.553	0.264735	0.241339	1.09694	0.272667	0.801345	116	98	65	27	111	167
FBti0020414	28.9891	-0.319556	0.293067	-1.09039	0.275542	0.804233	53	32	34	11	29	28
FBti0060923	11.2609	-0.335361	0.307701	-1.08989	0.27576	0.804233	26	16	11	2	6	19
FBti0061135	225.574	-0.204047	0.187668	-1.08727	0.276915	0.804492	320	250	296	84	257	257
FBti0019218	222.457	0.30602	0.281585	1.08678	0.277135	0.804609	199	335	159	118	181	400
FBti0063061	14.0782	0.338769	0.311756	1.08665	0.277192	0.804609	14	12	15	3	32	23
FBti0018981	14.3509	0.338683	0.311842	1.08607	0.277447	0.804661	12	19	7	10	15	20
FBti0060144	55.6742	-0.276802	0.255209	-1.08461	0.278095	0.805164	77	93	54	21	64	54
FBti0062681	35.9329	-0.301611	0.278509	-1.08295	0.278831	0.806425	55	41	54	7	48	45
FBti0019411	43.9837	0.337402	0.312129	1.08097	0.279711	0.807244	65	29	25	31	32	70
FBti0063516	17.6678	0.327166	0.303001	1.07975	0.280252	0.807627	22	21	10	7	25	32
FBti0063742	16.1354	-0.336805	0.311972	-1.0796	0.28032	0.807633	21	28	25	1	19	25
FBti0019147	6.29823	-0.143153	0.133184	-1.07485	0.282441	0.809476	0	42	6	0	0	0
FBti0019464	114.992	-0.232201	0.216326	-1.07338	0.283099	0.81033	144	201	110	42	122	139
FBti0019581	248.462	-0.333812	0.311139	-1.07287	0.283328	0.810678	458	437	211	18	327	394
FBti0062337	419.282	-0.0999091	0.0938386	-1.06469	0.287015	0.813458	563	545	468	131	504	610
FBti0019545	669.074	0.320583	0.301607	1.06291	0.287821	0.814219	137	536	988	406	709	1209
FBti0062605	14.5998	0.326395	0.307911	1.06003	0.289131	0.816177	11	18	13	7	25	18
FBti0018880	7.58153	-0.312433	0.296441	-1.05395	0.291907	0.819079	12	17	9	0	12	7
FBti0060284	17.1951	-0.324566	0.308341	-1.05262	0.292515	0.819252	24	30	23	2	17	29
FBti0063315	51.2838	-0.229696	0.218176	-1.0528	0.292431	0.819252	72	74	60	13	59	75
FBti0019510	38.8242	-0.268238	0.255334	-1.05054	0.293472	0.819502	63	48	48	9	48	52
FBti0062029	8.34795	-0.32756	0.311321	-1.05216	0.292726	0.819502	10	17	12	1	11	9
FBti0062347	15.2601	-0.323859	0.308587	-1.04949	0.293953	0.819721	35	29	7	4	14	16
FBti0020198	8.6811	-0.32631	0.312295	-1.04488	0.29608	0.821695	16	14	9	2	9	10
FBti0061827	6.27468	0.314561	0.301342	1.04387	0.296548	0.821953	5	5	7	1	10	18
FBti0062699	6.21206	-0.318553	0.305306	-1.04339	0.296768	0.822193	13	7	8	2	4	7
FBti0064176	14.4603	-0.320581	0.30824	-1.04004	0.298323	0.823729	25	19	20	2	19	18
FBti0062536	7.70423	-0.323704	0.312152	-1.03701	0.299732	0.824572	12	10	12	2	8	8
FBti0019876	18.3745	-0.319495	0.308851	-1.03446	0.30092	0.825237	23	33	21	8	11	21
FBti0019351	286.4	-0.300785	0.290933	-1.03386	0.3012	0.825237	470	438	298	33	397	450
FBti0019570	10.7591	0.263239	0.255179	1.03158	0.302267	0.826204	15	8	0	7	11	24
FBti0063426	16.8789	-0.309998	0.301417	-1.02847	0.30373	0.827588	28	22	23	3	18	25
FBti0018911	57.812	-0.319079	0.310932	-1.0262	0.304796	0.828734	113	102	43	6	83	76
FBti0061440	61.1958	0.281128	0.27445	1.02433	0.305678	0.829497	82	69	46	15	88	131
FBti0020129	18.8227	0.251629	0.246001	1.02288	0.306365	0.830487	20	17	3	0	44	66
FBti0018885	191.154	-0.162485	0.158974	-1.02208	0.306743	0.830868	282	241	204	69	221	239
FBti0018871	17.9214	0.15758	0.154255	1.02155	0.306992	0.831072	0	0	12	0	74	55
FBti0062398	23.9156	0.296642	0.290779	1.02016	0.307651	0.831185	21	34	20	8	43	35
FBti0019286	102.579	-0.276285	0.271626	-1.01715	0.309082	0.831189	187	228	102	0	160	96
FBti0062529	6.16602	0.304997	0.299876	1.01708	0.309117	0.831189	8	3	4	4	9	8
FBti0060925	20.8824	-0.314326	0.311333	-1.00961	0.312681	0.834792	42	33	21	2	15	41
FBti0060885	23.491	0.283961	0.282396	1.00554	0.314636	0.83634	27	20	25	10	34	35
FBti0019928	5.77427	-0.289461	0.288207	-1.00435	0.315209	0.836421	10	11	8	0	10	4
FBti0063496	9.66907	0.313566	0.312294	1.00407	0.315343	0.836421	9	12	8	2	19	19
FBti0020223	21.0971	-0.307304	0.306981	-1.00105	0.316802	0.837605	40	20	29	6	17	30
FBti0063951	5.69792	0.303767	0.304013	0.999191	0.317702	0.837605	6	5	5	1	13	11
FBti0020345	8.34558	0.192399	0.192841	0.997708	0.318421	0.83834	0	0	11	7	8	19
FBti0063354	12.6898	-0.309872	0.311971	-0.993271	0.320578	0.840018	27	11	17	4	9	16
FBti0019367	163.326	-0.262887	0.265025	-0.991935	0.321229	0.840463	248	271	144	66	116	216
FBti0061140	5.96127	-0.298503	0.301584	-0.989785	0.322279	0.841078	7	12	8	2	7	3
FBti0062801	8.03554	-0.307929	0.311254	-0.98932	0.322506	0.841078	17	11	8	2	8	9
FBti0062729	64.2008	0.231894	0.234611	0.988419	0.322948	0.841631	60	66	80	27	76	105
FBti0019595	32.1276	-0.29776	0.304032	-0.979369	0.327398	0.845637	60	54	26	5	38	48
FBti0018953	8.24595	0.30532	0.312225	0.977887	0.32813	0.845637	7	9	8	3	13	15
FBti0063549	30.7239	0.251027	0.256153	0.979986	0.327093	0.845637	33	31	34	12	41	50
FBti0059740	24.7404	-0.265966	0.271516	-0.979558	0.327304	0.845637	37	36	27	8	27	30
FBti0020298	21.5893	-0.295118	0.301819	-0.977797	0.328174	0.845654	37	34	23	3	30	28
FBti0059737	84.2592	0.303176	0.310322	0.976971	0.328584	0.846105	117	95	42	14	183	161
FBti0018869	296.32	0.268063	0.276066	0.97101	0.331543	0.849763	252	484	221	66	498	589
FBti0063678	13.6237	-0.299034	0.308852	-0.968213	0.332938	0.850752	25	18	15	4	11	19
FBti0062573	8.22156	0.278213	0.287862	0.966482	0.333803	0.850998	3	4	12	6	7	14
FBti0063937	26.5581	0.25633	0.265764	0.964504	0.334793	0.852028	30	29	25	11	39	38
FBti0019783	15.2531	-0.28943	0.300585	-0.962889	0.335603	0.852592	21	21	22	4	14	22
FBti0063540	41.8876	0.246497	0.256688	0.960296	0.336906	0.853565	55	47	32	18	60	58
FBti0061781	20.8192	0.278686	0.29079	0.958374	0.337874	0.85422	18	22	25	7	35	32
FBti0064274	8.9771	-0.285593	0.298008	-0.958341	0.337891	0.85422	15	24	4	2	10	8
FBti0059856	140.066	0.169921	0.178088	0.954142	0.340012	0.855893	180	144	151	46	179	241
FBti0019548	17.3672	0.144957	0.151994	0.953701	0.340235	0.85602	15	0	0	0	38	89
FBti0062125	9.59147	0.285182	0.299049	0.953632	0.34027	0.85602	12	3	9	6	8	19
FBti0060851	8.81704	-0.296324	0.311543	-0.951151	0.341528	0.857383	17	10	11	3	6	11
FBti0061510	79.991	0.295042	0.310773	0.949381	0.342427	0.858491	74	124	41	47	134	60
FBti0061511	7.55174	0.289746	0.30594	0.947071	0.343603	0.859055	11	4	5	4	9	14
FBti0062672	31.1945	-0.267875	0.28298	-0.946623	0.343831	0.8592	47	49	35	6	31	53
FBti0020201	54.4262	0.293907	0.310994	0.945057	0.34463	0.859374	46	99	20	25	83	79
FBti0019381	9.89358	0.290394	0.307318	0.944931	0.344694	0.859387	16	8	4	3	19	18
FBti0019027	6.40148	-0.201367	0.213426	-0.943498	0.345426	0.859572	13	16	7	0	0	13
FBti0062630	6.06897	0.29038	0.308043	0.942662	0.345854	0.859572	7	4	6	2	10	12
FBti0020014	80.3211	-0.253572	0.269948	-0.939337	0.347558	0.861194	166	165	66	22	116	2
FBti0020089	68.8674	0.262899	0.281082	0.935309	0.349629	0.862421	89	65	63	26	135	71
FBti0061186	13.824	0.287382	0.307602	0.934263	0.350168	0.862993	19	13	10	5	23	22
FBti0060633	9.90465	-0.269334	0.289573	-0.930105	0.352317	0.863755	18	23	8	0	9	18
FBti0063183	5.49524	-0.271093	0.291505	-0.929977	0.352383	0.863755	7	11	9	0	9	5
FBti0019186	29.0877	0.286842	0.309246	0.927553	0.35364	0.863767	19	31	35	15	23	59
FBti0019494	20.642	0.271744	0.294262	0.923474	0.35576	0.863767	25	23	17	7	38	28
FBti0060088	6.13127	0.260197	0.28175	0.923501	0.355746	0.863767	7	6	2	4	3	15
FBti0060973	66.0252	-0.20032	0.216373	-0.925812	0.354543	0.863767	93	101	68	18	72	101
FBti0061287	9.80032	0.28727	0.310113	0.926341	0.354269	0.863767	9	11	6	7	9	14
FBti0063535	9.5355	-0.290067	0.312184	-0.929154	0.352809	0.863767	15	13	15	1	10	15
FBti0019444	2146.9	-0.0894278	0.097349	-0.918631	0.358289	0.866248	2986	2683	2327	757	2570	2856
FBti0064130	13.1379	-0.285988	0.311982	-0.916681	0.35931	0.86682	27	15	15	3	11	20
FBti0059889	7.96051	0.285439	0.312026	0.914794	0.3603	0.86744	9	9	6	2	13	17
FBti0018920	7.4973	-0.262209	0.287586	-0.91176	0.361895	0.868474	19	7	8	3	2	9
FBti0018983	193.69	-0.207425	0.22768	-0.911036	0.362276	0.868474	334	262	173	49	228	293
FBti0060607	15.7643	0.281023	0.307989	0.912444	0.361535	0.868474	12	13	16	13	11	19
FBti0019214	214.101	-0.159907	0.175911	-0.909019	0.36334	0.868586	241	361	223	73	237	293
FBti0020286	40.3319	0.221686	0.244162	0.90795	0.363905	0.869422	50	49	36	12	57	72
FBti0060387	8.68617	-0.262924	0.289652	-0.907722	0.364025	0.869525	12	9	20	0	13	10
FBti0019529	9.92723	-0.283269	0.312295	-0.907055	0.364378	0.869689	15	11	15	4	9	9
FBti0018944	14.8206	0.278427	0.306945	0.907089	0.364359	0.869689	20	12	12	7	19	24
FBti0059636	9.14312	-0.282616	0.311674	-0.906767	0.36453	0.869742	17	9	14	2	8	13
FBti0062041	21.0903	-0.27148	0.300383	-0.903779	0.366112	0.869824	27	39	25	3	26	32
FBti0059716	199.701	0.265747	0.293876	0.904281	0.365846	0.869824	285	138	198	40	398	353
FBti0059756	6.57316	0.174574	0.193055	0.904266	0.365854	0.869824	11	0	0	2	16	17
FBti0019054	497.294	0.268118	0.296996	0.902765	0.366651	0.870621	725	426	396	103	551	1383
FBti0019602	37.3526	0.177949	0.197257	0.902116	0.366995	0.870839	3	0	55	41	5	68
FBti0019450	37.308	0.280774	0.311783	0.900545	0.36783	0.871674	48	32	27	27	29	47
FBti0062063	21.2668	0.259335	0.288004	0.900456	0.367878	0.871695	25	21	21	8	25	41
FBti0018902	9.54967	-0.136269	0.151866	-0.897294	0.369562	0.8724	35	0	23	0	0	11
FBti0060960	18.9004	0.259072	0.290278	0.892493	0.372129	0.873363	20	22	17	8	22	34
FBti0063126	45.6669	-0.223045	0.249677	-0.893336	0.371677	0.873363	67	57	60	10	52	72
FBti0061159	10.3495	0.2566	0.288426	0.889654	0.373652	0.874058	14	2	11	2	20	25
FBti0019404	378.715	-0.220097	0.247793	-0.888229	0.374418	0.874753	491	525	471	176	283	424
FBti0061820	16.191	0.274556	0.309305	0.887654	0.374727	0.874838	12	15	22	5	30	25
FBti0019002	424.404	-0.208383	0.234947	-0.886935	0.375114	0.875024	552	592	512	196	395	406
FBti0019646	45.179	-0.274908	0.310031	-0.886711	0.375235	0.875024	90	73	38	10	82	17
FBti0019798	7.15364	0.272057	0.307935	0.883488	0.376973	0.876358	5	7	8	3	7	17
FBti0062178	14.9723	0.259029	0.294086	0.880795	0.378429	0.87757	2	20	17	9	18	24
FBti0019460	6.85761	-0.211453	0.240469	-0.879338	0.379218	0.877859	8	19	9	0	14	1
FBti0019540	77.8899	0.180229	0.20597	0.875026	0.38156	0.879133	32	121	0	1	191	279
FBti0020202	39.3236	-0.252951	0.289268	-0.874449	0.381874	0.879302	38	55	68	8	52	52
FBti0019996	107.53	0.205681	0.235191	0.874524	0.381833	0.879302	128	114	118	26	149	217
FBti0020287	11.7747	-0.272063	0.312294	-0.871175	0.383659	0.8799	14	15	22	2	17	12
FBti0020227	93.7488	-0.160383	0.184345	-0.870015	0.384292	0.880267	127	116	110	36	104	116
FBti0061876	16.2575	-0.26272	0.30198	-0.869993	0.384304	0.880267	27	21	20	4	15	25
FBti0019579	17.55	-0.267064	0.308537	-0.865581	0.38672	0.881165	16	17	40	8	13	13
FBti0019975	366.291	-0.11724	0.135456	-0.865517	0.386755	0.881165	930	1306	220	0	0	323
FBti0062068	19.5562	0.2499	0.288808	0.865281	0.386885	0.881165	24	18	20	7	27	34
FBti0062628	9.40875	-0.269597	0.311438	-0.865652	0.386681	0.881165	9	22	11	2	10	12
FBti0063388	24.7053	-0.249808	0.288743	-0.865159	0.386952	0.881165	38	38	28	4	34	34
FBti0020114	27.7968	-0.266141	0.308165	-0.863632	0.38779	0.882093	50	27	35	13	22	25
FBti0060792	16.1587	-0.241928	0.280916	-0.861212	0.389121	0.882771	22	22	32	0	32	11
FBti0061656	60.878	0.196822	0.230381	0.854334	0.39292	0.885	79	58	65	21	94	87
FBti0064117	10.8221	-0.258389	0.302707	-0.853593	0.39333	0.885115	22	11	14	4	14	4
FBti0060512	7.58847	-0.248929	0.291926	-0.852714	0.393818	0.885152	14	17	6	0	9	12
FBti0060890	19.4553	-0.264723	0.312234	-0.847833	0.396531	0.887	40	29	17	2	27	27
FBti0060626	8.50108	-0.246246	0.291135	-0.845813	0.397657	0.88763	11	12	17	0	7	17
FBti0063382	19.1024	-0.263109	0.311954	-0.843422	0.398992	0.889359	38	28	18	2	28	25
FBti0063138	31.9922	-0.218534	0.259353	-0.842612	0.399446	0.889614	44	39	41	12	33	39
FBti0019658	38.2894	0.24937	0.297189	0.839096	0.401416	0.890403	17	60	27	34	40	19
FBti0059765	425.66	0.137687	0.16459	0.836545	0.402848	0.891443	544	484	435	139	486	785
FBti0062034	35.3783	-0.229574	0.274623	-0.835962	0.403176	0.891584	62	45	34	12	35	47
FBti0019430	2814.55	-0.0406618	0.0489227	-0.831144	0.405892	0.892576	3585	3708	3041	939	3488	4029
FBti0062620	91.8412	-0.148786	0.179252	-0.830034	0.406519	0.892748	126	124	98	33	98	127
FBti0020091	53.6914	-0.251874	0.303904	-0.828795	0.407221	0.893241	82	76	81	1	76	86
FBti0060503	14.498	0.251878	0.303864	0.828915	0.407152	0.893241	13	19	13	6	17	27
FBti0019333	7.12306	-0.247002	0.298728	-0.826843	0.408326	0.89382	9	16	9	0	10	10
FBti0060132	12.5231	-0.257391	0.31153	-0.826218	0.408681	0.893881	23	21	10	3	13	17
FBti0019246	15.7174	-0.254055	0.309479	-0.820915	0.411695	0.894413	24	21	19	6	20	11
FBti0062380	20.2655	-0.244397	0.296806	-0.823424	0.410267	0.894413	28	25	29	6	28	19
FBti0063518	7.39451	0.252837	0.308342	0.819988	0.412223	0.894784	7	8	7	2	8	20
FBti0019576	46.6215	0.250917	0.306322	0.819129	0.412713	0.895425	23	72	48	25	58	61
FBti0062130	11.3626	0.255024	0.311792	0.81793	0.413397	0.895756	9	7	17	4	19	19
FBti0018936	15.2264	0.142115	0.174219	0.815725	0.414658	0.8969	0	21	4	13	42	0
FBti0060138	9.88294	0.253946	0.312282	0.813194	0.416107	0.89741	9	13	9	2	15	23
FBti0020178	762.153	0.0897257	0.110379	0.812888	0.416283	0.897458	879	971	803	306	869	1130
FBti0019100	21.5937	0.251116	0.308953	0.812799	0.416333	0.897471	39	10	13	9	43	25
FBti0020070	364.024	0.249271	0.307268	0.811251	0.417222	0.897849	371	665	126	139	697	418
FBti0018978	115.238	0.127328	0.157573	0.808056	0.419058	0.898622	137	134	128	38	147	189
FBti0019118	10.1292	0.115155	0.142938	0.805625	0.420459	0.89883	11	0	0	10	0	32
FBti0020306	66.5142	-0.21952	0.272424	-0.805802	0.420357	0.89883	122	63	80	17	76	97
FBti0019145	341.063	-0.193011	0.239836	-0.804763	0.420957	0.89883	598	481	590	1	453	415
FBti0019471	341.063	-0.193011	0.239836	-0.804763	0.420957	0.89883	598	481	590	1	453	415
FBti0018896	99.3808	0.161169	0.20021	0.804998	0.420821	0.89883	121	97	115	38	118	162
FBti0019497	10.2262	0.229045	0.284355	0.80549	0.420537	0.89883	18	7	2	6	8	22
FBti0019517	41.746	0.203896	0.252865	0.806342	0.420046	0.89883	57	39	42	14	62	65
FBti0060955	529.765	0.12015	0.149462	0.803888	0.421462	0.89883	720	588	514	213	685	716
FBti0019568	894.176	0.194455	0.243086	0.799941	0.423745	0.901051	1089	1325	602	248	1611	1290
FBti0020325	786.593	0.115972	0.145592	0.796555	0.425709	0.902189	981	1079	678	302	936	1203
FBti0019553	13.9307	-0.155773	0.195663	-0.796128	0.425957	0.902313	39	12	23	0	27	0
FBti0061865	5.58183	-0.242808	0.305307	-0.795292	0.426443	0.902313	10	8	7	1	8	5
FBti0062725	35.4272	-0.24306	0.306139	-0.793953	0.427223	0.902313	52	59	32	18	27	30
FBti0019284	8.68915	0.232353	0.29331	0.792175	0.428258	0.902381	13	9	3	2	9	27
FBti0019221	40.6063	0.200729	0.25348	0.791892	0.428424	0.902381	42	41	47	19	48	59
FBti0061009	53.8589	0.232967	0.294183	0.791914	0.428411	0.902381	83	58	30	26	64	80
FBti0060483	21.5934	0.240584	0.304023	0.791332	0.42875	0.902461	30	26	13	7	39	31
FBti0019298	76.8086	-0.119798	0.151983	-0.788232	0.430561	0.904242	135	112	200	0	0	119
FBti0020434	469.207	0.101589	0.12899	0.787575	0.430945	0.904561	620	540	469	176	553	731
FBti0019466	1376.07	0.0867558	0.110346	0.786218	0.43174	0.904945	1770	1672	1369	544	1673	1935
FBti0060729	33.6007	0.201561	0.257766	0.781954	0.434241	0.906925	42	40	31	10	45	62
FBti0062582	39.2654	0.186859	0.240396	0.777296	0.436984	0.907983	47	41	41	16	48	62
FBti0020035	24.4967	0.187584	0.241943	0.775322	0.43815	0.908878	0	45	15	8	31	73
FBti0019053	174.453	0.237034	0.305707	0.775363	0.438125	0.908878	152	203	184	123	115	209
FBti0061225	5.91334	-0.223799	0.289195	-0.773869	0.439008	0.908999	9	8	10	1	2	12
FBti0062415	10.6389	-0.239088	0.308965	-0.773836	0.439028	0.908999	17	23	6	4	10	10
FBti0019733	340.835	0.161351	0.209397	0.770547	0.440975	0.909734	363	419	362	162	460	366
FBti0019443	130.557	0.231981	0.301345	0.769819	0.441407	0.909753	220	133	66	34	178	286
FBti0019722	13.6724	0.236634	0.308258	0.76765	0.442695	0.910055	14	15	15	3	26	23
FBti0019005	5.93965	0.226921	0.296435	0.7655	0.443974	0.910486	2	9	6	2	12	9
FBti0059674	30.1808	0.210085	0.275	0.763944	0.444901	0.911316	25	40	35	9	43	54
FBti0019150	196.671	-0.182176	0.239548	-0.760501	0.446955	0.912415	317	253	204	41	226	345
FBti0018901	146.111	-0.167145	0.221951	-0.75307	0.451408	0.914229	211	218	140	45	134	244
FBti0061694	255.349	-0.0900786	0.119898	-0.751296	0.452474	0.914229	319	349	290	80	289	394
FBti0059963	6.89664	-0.234518	0.311094	-0.753847	0.450941	0.914229	9	9	11	2	8	7
FBti0020291	9.91725	-0.215631	0.287525	-0.749955	0.453282	0.914646	21	19	7	0	11	18
FBti0062186	9.21964	-0.221058	0.295262	-0.748684	0.454048	0.914804	17	9	16	0	12	15
FBti0020216	6.74392	-0.216388	0.28975	-0.74681	0.455178	0.9149	8	8	15	0	10	9
FBti0148146	10.4697	-0.232345	0.311353	-0.746243	0.455521	0.915313	14	12	17	3	12	12
FBti0059659	208.11	-0.137115	0.183765	-0.746146	0.455579	0.915348	238	258	296	56	248	324
FBti0018874	170.185	0.148635	0.199713	0.744245	0.456729	0.915977	198	161	0	67	259	477
FBti0064087	9.10765	0.232177	0.312147	0.743806	0.456994	0.916056	9	8	11	3	15	15
FBti0061061	7.8666	0.231127	0.312295	0.740091	0.459245	0.917621	7	9	8	3	11	14
FBti0059650	60.0323	-0.218317	0.29568	-0.738356	0.460298	0.918068	109	43	86	18	66	78
FBti0059705	11.5744	-0.229443	0.310961	-0.737851	0.460605	0.918068	22	10	16	4	7	17
FBti0020165	212.355	-0.159113	0.21573	-0.737556	0.460784	0.918108	351	334	376	0	324	189
FBti0019511	75.7615	-0.168532	0.229171	-0.735397	0.462098	0.918574	92	112	86	29	65	112
FBti0020167	18.9333	-0.22782	0.312056	-0.730061	0.465353	0.918794	29	31	17	9	10	23
FBti0060420	8.74341	0.228826	0.312244	0.732845	0.463653	0.918794	6	12	9	3	12	17
FBti0061683	6.75614	-0.181041	0.247815	-0.730549	0.465055	0.918794	14	17	3	0	14	3
FBti0019051	82.657	0.159499	0.218614	0.729589	0.465642	0.918884	88	87	106	24	125	131
FBti0060950	62.3322	-0.149317	0.205674	-0.725989	0.467845	0.919256	71	85	80	22	68	85
FBti0061139	5.86478	-0.200311	0.275682	-0.7266	0.467471	0.919256	14	3	8	3	4	3
FBti0062504	5.94773	0.22393	0.309538	0.723432	0.469414	0.91956	5	7	6	2	10	10
FBti0060287	9.5649	-0.225632	0.312168	-0.722791	0.469808	0.91971	16	16	9	2	12	12
FBti0060501	155.757	0.182125	0.252984	0.719906	0.471583	0.921181	197	160	157	69	130	289
FBti0059684	246.948	0.128465	0.178708	0.718852	0.472232	0.921569	348	286	223	75	333	415
FBti0019187	164.119	-0.149213	0.207852	-0.717879	0.472832	0.92202	198	560	105	0	262	126
FBti0062968	5.93149	0.221989	0.309571	0.717086	0.473321	0.92248	5	7	6	2	9	11
FBti0020119	68.4585	-0.202783	0.282872	-0.716873	0.473453	0.922489	97	110	62	32	69	59
FBti0062061	378.405	-0.095251	0.133146	-0.715389	0.474369	0.923177	529	458	418	139	416	525
FBti0018966	78.1883	-0.1965	0.275403	-0.713501	0.475536	0.923262	147	123	88	0	100	136
FBti0060489	309.971	-0.112477	0.157873	-0.712455	0.476183	0.923262	433	403	340	87	345	512
FBti0063086	11.9505	0.221001	0.309898	0.71314	0.475759	0.923262	6	16	12	8	13	14
FBti0063378	14.5983	-0.221294	0.311304	-0.710862	0.47717	0.923651	28	22	12	3	15	23
FBti0063453	9.05131	0.219287	0.30862	0.710539	0.47737	0.923824	14	9	4	4	10	18
FBti0019712	10.1235	0.161071	0.227016	0.709516	0.478004	0.924153	0	13	11	3	36	5
FBti0019492	113.62	-0.120138	0.169327	-0.709503	0.478012	0.924153	153	146	135	31	156	153
FBti0018913	55.8367	-0.194327	0.274984	-0.706684	0.479763	0.924749	120	53	79	0	81	86
FBti0019356	6.71588	-0.104217	0.147585	-0.706147	0.480097	0.92488	25	0	13	0	10	0
FBti0019780	107.502	-0.157252	0.22319	-0.704566	0.481081	0.925124	177	130	105	38	110	151
FBti0062106	12.7667	0.146864	0.208488	0.704428	0.481166	0.925124	6	0	20	11	25	2
FBti0062445	8.43101	0.219995	0.312277	0.704489	0.481128	0.925124	7	9	10	3	13	14
FBti0059738	102.63	-0.134655	0.191005	-0.704983	0.480821	0.925124	147	116	123	36	126	127
FBti0061343	6.80953	0.213987	0.304299	0.703212	0.481924	0.925388	3	11	6	3	11	10
FBti0062732	17.1913	-0.210826	0.30025	-0.702169	0.482574	0.925658	25	28	18	4	17	28
FBti0060461	9.59862	0.218221	0.312095	0.699215	0.484418	0.927177	7	14	9	3	19	13
FBti0020265	26.0897	-0.152169	0.217723	-0.69891	0.484608	0.927383	1	40	84	2	2	60
FBti0019737	495.006	-0.0717162	0.102638	-0.698729	0.484722	0.927393	613	634	599	144	617	752
FBti0019463	19.5321	0.217828	0.312155	0.697821	0.485289	0.927707	12	37	12	8	35	24
FBti0062252	9.44027	0.191346	0.274753	0.696429	0.48616	0.927828	1	9	15	4	21	10
FBti0019740	31.8993	0.185202	0.267898	0.691315	0.489368	0.929138	29	45	34	9	49	53
FBti0059964	12.1087	0.21572	0.312144	0.691091	0.489508	0.929138	14	15	7	7	18	12
FBti0019590	319.191	-0.19662	0.285447	-0.688815	0.49094	0.929497	396	361	486	163	264	262
FBti0060449	10.2564	0.214857	0.312184	0.688239	0.491302	0.929497	11	10	12	2	17	21
FBti0062759	14.8757	0.21201	0.308023	0.688292	0.491269	0.929497	6	26	13	6	30	16
FBti0148144	12.9062	-0.214425	0.312122	-0.686991	0.492088	0.93007	27	11	16	3	12	20
FBti0060895	22.3576	0.207905	0.302997	0.686162	0.492611	0.930572	31	21	18	11	21	39
FBti0061339	25.4676	0.199325	0.290492	0.686164	0.49261	0.930572	29	20	33	9	38	39
FBti0063880	6.74022	0.213442	0.311178	0.685916	0.492766	0.930572	8	7	6	2	12	11
FBti0019825	6.15893	0.192655	0.281044	0.685499	0.493029	0.930633	5	7	5	3	2	18
FBti0061631	11.1571	0.21368	0.311707	0.685517	0.493018	0.930633	11	9	15	2	17	26
FBti0060894	180.292	-0.0904557	0.13239	-0.683251	0.494448	0.931063	222	234	215	60	237	230
FBti0019747	282.948	-0.207435	0.305808	-0.678317	0.497571	0.931384	565	360	232	32	388	494
FBti0019220	214.266	0.0904556	0.133041	0.67991	0.496562	0.931384	282	249	221	71	295	315
FBti0019838	13.2437	-0.19419	0.285886	-0.679256	0.496976	0.931384	19	27	15	0	10	31
FBti0060319	11.4626	0.201321	0.297054	0.677725	0.497946	0.931384	21	4	7	7	13	16
FBti0060716	45.8452	-0.152939	0.225742	-0.677493	0.498093	0.931384	54	60	61	15	53	62
FBti0061000	14.806	-0.211495	0.311567	-0.678809	0.497259	0.931384	30	24	9	4	21	13
FBti0061808	10.7745	-0.211338	0.312053	-0.677252	0.498246	0.931384	16	18	10	4	8	15
FBti0062484	24.0305	-0.194479	0.285931	-0.680161	0.496402	0.931384	37	27	32	6	26	37
FBti0059766	195.347	-0.101982	0.150353	-0.678286	0.497591	0.931384	272	257	214	52	247	299
FBti0063396	130.013	-0.0988992	0.146878	-0.673342	0.500729	0.932256	174	162	148	45	153	179
FBti0020293	71.1266	-0.126445	0.18925	-0.668141	0.504044	0.933022	97	96	80	20	92	99
FBti0018950	16.0356	-0.14966	0.223979	-0.668187	0.504014	0.933022	42	23	12	10	0	5
FBti0060770	8.80111	0.198343	0.296868	0.668118	0.504058	0.933022	12	8	4	7	7	10
FBti0064268	52.299	0.0680367	0.101756	0.668626	0.503734	0.933022	29	0	0	83	57	0
FBti0020174	25.2961	0.153456	0.232044	0.661321	0.508406	0.935628	50	13	0	20	34	21
FBti0059720	15.1705	0.198484	0.301042	0.659322	0.509689	0.93614	6	13	24	8	10	33
FBti0020181	79.333	-0.139051	0.212182	-0.65534	0.512249	0.936544	119	92	88	29	96	95
FBti0019932	101.713	-0.128756	0.196666	-0.654691	0.512667	0.936853	135	113	135	33	132	127
FBti0063252	36.9614	-0.180518	0.276645	-0.652527	0.514061	0.937515	59	40	47	9	54	44
FBti0063434	14.8871	0.198223	0.304551	0.650868	0.515132	0.93792	14	22	12	6	18	26
FBti0019049	83.6232	-0.172466	0.265853	-0.64873	0.516513	0.938689	153	25	185	34	108	5
FBti0062187	47.0417	-0.184226	0.284228	-0.64816	0.516881	0.938689	71	56	62	7	69	71
FBti0020270	11.1568	0.199519	0.311975	0.639535	0.522475	0.938919	10	9	15	5	13	19
FBti0020166	6.5195	-0.130682	0.203275	-0.642886	0.520298	0.938919	9	14	10	0	15	0
FBti0019282	246.142	-0.200044	0.312261	-0.640632	0.521762	0.938919	410	413	201	130	254	78
FBti0060325	8.31248	-0.154558	0.241293	-0.640543	0.521819	0.938919	5	28	8	0	3	21
FBti0060796	14.8552	-0.197057	0.3068	-0.642296	0.520681	0.938919	24	17	20	3	16	24
FBti0061312	45.5684	-0.148289	0.231451	-0.64069	0.521724	0.938919	67	55	54	13	55	65
FBti0063478	20.1986	-0.192125	0.299514	-0.641454	0.521228	0.938919	27	27	29	3	29	29
FBti0059655	5.57516	0.190499	0.296438	0.642626	0.520467	0.938919	7	6	3	3	4	12
FBti0062813	8.09364	-0.116658	0.182892	-0.637853	0.523569	0.939095	21	12	8	5	0	0
FBti0060981	21.3135	0.197812	0.312255	0.633496	0.52641	0.939822	27	23	19	3	51	31
FBti0061296	7.9283	-0.193106	0.304991	-0.633152	0.526635	0.939822	11	7	15	2	12	6
FBti0059748	13.3024	0.197194	0.311935	0.632166	0.527278	0.939822	22	11	9	5	19	22
FBti0060274	9.80226	-0.19399	0.307851	-0.630144	0.5286	0.939904	19	14	9	2	17	7
FBti0019302	8.86562	-0.195389	0.311418	-0.627418	0.530385	0.939979	15	10	13	1	11	14
FBti0019419	31.6903	-0.191693	0.306683	-0.625054	0.531936	0.939979	47	41	37	13	44	19
FBti0019901	40.4986	0.178132	0.283694	0.627904	0.530067	0.939979	32	59	40	21	45	54
FBti0062002	7.19602	0.19381	0.309135	0.626943	0.530697	0.939979	11	7	4	3	10	12
FBti0062377	10.397	-0.19397	0.308393	-0.628971	0.529368	0.939979	9	18	18	1	11	19
FBti0063147	12.2622	0.192003	0.30773	0.623932	0.532672	0.939979	16	12	11	5	15	21
FBti0063156	28.1802	-0.191063	0.306314	-0.62375	0.532792	0.939979	55	34	23	11	34	25
FBti0059733	184.586	0.158118	0.252848	0.62535	0.531741	0.939979	299	183	140	73	204	312
FBti0059770	410.311	0.100955	0.161987	0.623231	0.533133	0.939979	563	498	365	165	483	598
FBti0059798	19.4349	0.192169	0.306952	0.626053	0.53128	0.939979	29	24	11	6	29	34
FBti0019082	24.742	-0.179403	0.287916	-0.623109	0.533213	0.940036	28	46	26	6	30	36
FBti0060201	98.088	-0.118131	0.189786	-0.622442	0.533652	0.940036	106	134	132	29	116	146
FBti0018973	43.2102	0.106524	0.171743	0.620254	0.535091	0.94023	0	0	80	46	44	24
FBti0020406	39.2711	-0.145804	0.234524	-0.6217	0.534139	0.94023	50	54	46	13	50	48
FBti0061255	5.35106	-0.112146	0.18099	-0.619626	0.535504	0.94023	15	1	11	0	0	13
FBti0062390	13.9848	-0.19278	0.311552	-0.618771	0.536067	0.940301	20	25	11	6	11	17
FBti0020230	11.862	-0.191788	0.310995	-0.616693	0.537437	0.941018	21	17	10	4	12	15
FBti0019484	48.0418	-0.158302	0.257594	-0.614541	0.538858	0.941266	60	52	72	15	49	73
FBti0019256	20.2	0.152451	0.248492	0.613507	0.539541	0.941509	33	22	0	12	21	36
FBti0019552	162.272	0.082311	0.13469	0.611115	0.541124	0.941832	120	0	120	0	630	386
FBti0019352	19.7517	-0.162744	0.267212	-0.609043	0.542496	0.942095	19	15	52	0	35	24
FBti0018915	16.4444	0.0822312	0.136106	0.60417	0.545731	0.942282	26	0	0	21	0	22
FBti0060622	15.3067	0.18782	0.309659	0.606536	0.544159	0.942282	18	18	11	9	17	19
FBti0061349	36.9691	-0.169702	0.279769	-0.606578	0.544131	0.942282	55	61	32	9	54	45
FBti0063538	31.5578	-0.158683	0.262468	-0.604579	0.545459	0.942282	40	44	41	7	38	50
FBti0062208	21.6289	0.187457	0.311952	0.600915	0.547896	0.943166	15	24	28	10	40	18
FBti0019101	17.5086	-0.115704	0.193027	-0.59942	0.548893	0.943373	45	20	22	0	0	47
FBti0020052	47.5971	0.173313	0.289294	0.599088	0.549114	0.943513	59	60	35	27	53	54
FBti0063125	5.5228	-0.0883539	0.147455	-0.599193	0.549044	0.943513	0	14	16	0	10	0
FBti0019354	161.127	-0.166696	0.280614	-0.594041	0.552485	0.943727	336	143	217	1	221	296
FBti0019846	5.32442	0.180493	0.30423	0.593277	0.552996	0.943727	7	5	5	1	10	10
FBti0060198	21.3036	0.105996	0.177504	0.597147	0.55041	0.943727	24	23	0	18	47	0
FBti0061469	11.1534	-0.185205	0.311928	-0.593744	0.552683	0.943727	12	26	9	3	13	14
FBti0019254	1927.02	0.0551691	0.0934401	0.590422	0.554908	0.944153	2528	2307	1988	701	2324	2877
FBti0019301	53.9611	0.141393	0.239552	0.590237	0.555032	0.944153	80	0	58	15	137	76
FBti0018872	27.4191	0.154967	0.26297	0.589296	0.555663	0.944227	39	24	15	0	82	51
FBti0018965	403.661	-0.179225	0.304376	-0.588826	0.555978	0.944227	532	593	478	230	331	222
FBti0061726	14.0716	0.183759	0.311746	0.58945	0.55556	0.944227	21	11	14	3	25	25
FBti0062174	7.38	0.183213	0.311146	0.588834	0.555973	0.944227	7	10	6	3	13	9
FBti0061806	47.5268	-0.139456	0.237254	-0.587794	0.55667	0.944557	54	60	65	17	59	56
FBti0019338	5.48176	-0.085497	0.145725	-0.586701	0.557404	0.944955	0	9	20	0	10	0
FBti0060007	12.9182	0.178841	0.305697	0.585028	0.558529	0.945414	15	15	11	6	17	18
FBti0063443	15.9306	0.181761	0.311185	0.584094	0.559157	0.945843	27	13	11	6	24	24
FBti0131273	1856.46	-0.0459535	0.0787146	-0.583799	0.559356	0.945894	2428	2313	2088	582	2281	2804
FBti0019048	48.7234	0.100026	0.171533	0.58313	0.559806	0.946014	0	111	0	4	157	102
FBti0019800	9.52573	0.181847	0.312087	0.58268	0.560109	0.946014	13	11	7	3	13	18
FBti0063212	14.9962	-0.182063	0.312211	-0.583141	0.559798	0.946014	26	22	16	1	23	23
FBti0019349	45.1477	-0.130799	0.22588	-0.579066	0.562545	0.947725	112	63	36	29	0	17
FBti0062701	35.716	-0.142028	0.245738	-0.577965	0.563288	0.948022	51	43	42	12	41	48
FBti0059714	34.6103	-0.162739	0.281847	-0.577402	0.563668	0.948158	61	41	33	11	46	39
FBti0059980	18.3418	-0.176645	0.307254	-0.574915	0.565349	0.948609	23	18	29	8	18	19
FBti0060458	15.8379	0.178951	0.312291	0.573027	0.566626	0.949412	26	12	11	8	24	17
FBti0062010	9.7124	-0.17774	0.3109	-0.571697	0.567527	0.949689	12	15	12	3	12	11
FBti0063862	9.41337	0.177821	0.311229	0.57135	0.567762	0.949689	12	8	9	4	18	9
FBti0060070	14.5064	0.17652	0.309323	0.570667	0.568226	0.949993	20	16	10	7	15	24
FBti0019615	51.018	-0.161078	0.28439	-0.5664	0.571122	0.950318	56	75	70	12	44	99
FBti0019081	57.7798	-0.155808	0.274022	-0.568598	0.569629	0.950318	103	76	49	14	81	77
FBti0019830	12.6383	0.171037	0.305863	0.559196	0.576028	0.950318	14	16	12	4	16	24
FBti0019336	44.6877	0.149055	0.268341	0.555468	0.578574	0.950318	53	47	48	19	71	47
FBti0019237	33.4776	-0.155044	0.274173	-0.565496	0.571737	0.950318	49	47	38	6	43	55
FBti0061059	19.1212	-0.173193	0.309696	-0.559235	0.576001	0.950318	17	32	25	9	20	16
FBti0061363	5.58921	-0.141548	0.249364	-0.567638	0.57028	0.950318	10	4	9	4	2	1
FBti0061401	5.53749	0.167983	0.296271	0.566992	0.57072	0.950318	9	6	2	2	10	8
FBti0061437	48.1835	-0.129437	0.231853	-0.558273	0.576658	0.950318	62	60	64	12	64	69
FBti0061462	6.95411	-0.168473	0.299016	-0.563424	0.573146	0.950318	5	11	13	2	4	12
FBti0062607	14.2404	0.171834	0.308267	0.557419	0.577241	0.950318	19	15	11	7	20	17
FBti0064066	15.7614	-0.177383	0.312143	-0.568277	0.569847	0.950318	20	32	15	2	28	17
FBti0064109	7.0686	-0.168957	0.30105	-0.561227	0.574643	0.950318	16	10	4	2	9	7
FBti0059691	34.7913	0.17242	0.306851	0.561901	0.574184	0.950318	32	36	36	28	14	41
FBti0059726	24.3216	-0.103665	0.185221	-0.559683	0.575696	0.950318	93	30	0	0	16	48
FBti0061050	47.6906	-0.152084	0.276761	-0.549515	0.582652	0.951278	77	50	53	21	50	50
FBti0063861	12.4614	-0.171105	0.311566	-0.549178	0.582883	0.951362	18	11	20	4	15	14
FBti0062209	15.344	0.170858	0.312217	0.547241	0.584213	0.952004	25	14	9	8	19	20
FBti0019375	550.1	0.0694678	0.127224	0.546029	0.585046	0.952106	758	620	562	185	711	838
FBti0061716	96.8475	-0.0953527	0.174422	-0.546679	0.584599	0.952106	117	142	103	34	107	140
FBti0062465	8.1105	0.147505	0.270107	0.5461	0.584997	0.952106	3	20	2	2	16	15
FBti0020241	15.5701	-0.161605	0.297493	-0.543223	0.586976	0.952591	20	22	20	4	17	24
FBti0019904	53.5387	-0.150522	0.277015	-0.543372	0.586873	0.952591	62	81	69	9	87	72
FBti0061895	88.885	-0.119544	0.220117	-0.543092	0.587066	0.952591	114	136	95	20	109	149
FBti0062008	15.5701	-0.161605	0.297493	-0.543223	0.586976	0.952591	20	22	20	4	17	24
FBti0063352	62.3095	0.143294	0.264381	0.541998	0.58782	0.952719	66	81	66	19	62	133
FBti0019840	13.6559	0.168639	0.311849	0.540771	0.588666	0.952987	21	8	15	3	21	28
FBti0061584	7.10109	0.12726	0.237844	0.535055	0.592612	0.954778	12	7	0	6	6	7
FBti0019853	8.22217	-0.131537	0.248278	-0.529798	0.596252	0.95487	16	9	11	3	0	15
FBti0018914	48.1838	0.0537399	0.101748	0.528168	0.597383	0.95487	0	61	0	66	60	0
FBti0059703	50.3959	0.126642	0.23814	0.531795	0.594868	0.95487	74	0	59	11	73	141
FBti0059728	54.8298	0.164244	0.310001	0.529817	0.596239	0.95487	77	45	58	7	102	111
FBti0061800	15.2965	0.164498	0.31196	0.527304	0.597983	0.955083	12	13	22	8	21	17
FBti0061801	15.7344	0.159909	0.303249	0.52732	0.597971	0.955083	18	17	15	8	16	24
FBti0019264	8.98038	0.151149	0.286944	0.526753	0.598365	0.955285	12	8	5	8	7	6
FBti0062902	16.6618	0.161416	0.306663	0.526364	0.598635	0.955285	21	12	21	6	21	29
FBti0019992	12.937	0.162987	0.311013	0.524053	0.600241	0.955368	19	15	9	2	17	33
FBti0020006	15.5919	0.157534	0.30158	0.522364	0.601417	0.955477	16	15	19	7	19	23
FBti0019269	13.717	-0.155132	0.296681	-0.522893	0.601049	0.955477	23	24	13	0	19	26
FBti0061449	33.29	-0.138309	0.264394	-0.523117	0.600893	0.955477	35	56	39	9	43	46
FBti0063262	20.2133	-0.157785	0.301348	-0.523595	0.60056	0.955477	21	24	32	8	18	27
FBti0019172	16.6614	-0.159078	0.30612	-0.519659	0.603301	0.956045	22	16	26	6	20	18
FBti0019091	41.0047	-0.130261	0.25077	-0.519443	0.603452	0.956094	63	45	49	12	49	59
FBti0061076	9.06344	-0.16197	0.312176	-0.518844	0.60387	0.956347	15	11	10	3	11	10
FBti0018982	5.75431	-0.144237	0.279218	-0.516574	0.605454	0.957	8	14	3	2	2	10
FBti0063576	35.7452	0.12471	0.241855	0.515642	0.606105	0.957018	45	40	37	13	48	53
FBti0019441	32.1176	0.129695	0.252578	0.513483	0.607613	0.957215	14	63	18	0	69	89
FBti0020428	34.6135	-0.132068	0.258575	-0.510751	0.609525	0.957479	37	49	48	9	44	50
FBti0060268	8.43903	-0.159573	0.312053	-0.511364	0.609096	0.957479	12	15	8	2	8	14
FBti0061127	13.6987	0.15783	0.308334	0.51188	0.608735	0.957479	19	12	13	6	15	23
FBti0063971	14.8224	-0.158567	0.309639	-0.512103	0.608579	0.957479	8	27	26	3	15	25
FBti0064089	6.44785	-0.158646	0.309952	-0.511842	0.608762	0.957479	11	7	8	2	7	8
FBti0062442	5.61372	0.128831	0.252688	0.50984	0.610163	0.957743	11	4	2	0	10	17
FBti0060148	16.1657	0.158147	0.310515	0.509305	0.610538	0.957775	27	16	10	6	24	24
FBti0061281	9.22218	0.158984	0.312287	0.509095	0.610685	0.957775	12	7	10	4	12	14
FBti0062911	6.47505	0.153858	0.303137	0.507551	0.611768	0.957951	8	5	8	1	9	16
FBti0019508	23.5791	-0.146476	0.289087	-0.506685	0.612376	0.958145	25	36	31	7	22	39
FBti0062024	6.98156	0.153645	0.304017	0.505383	0.61329	0.958391	10	4	8	2	8	16
FBti0062161	6.71843	0.15579	0.308202	0.505481	0.613221	0.958391	9	8	4	3	11	8
FBti0060389	8.07328	-0.156833	0.312273	-0.502229	0.615507	0.959137	11	13	8	3	8	10
FBti0019756	65.5191	-0.0733593	0.146392	-0.501114	0.616291	0.959242	97	170	78	0	141	0
FBti0060797	17.6684	-0.156367	0.312253	-0.50077	0.616533	0.959279	34	21	18	2	29	24
FBti0020441	36.0807	0.129575	0.259657	0.499023	0.617763	0.959525	45	40	36	15	53	43
FBti0061470	44.3685	0.11854	0.2375	0.499116	0.617698	0.959525	50	60	46	12	69	68
FBti0020226	5.2915	-0.147434	0.295892	-0.498268	0.618295	0.959664	8	11	4	1	4	10
FBti0019148	6081.75	-0.0913183	0.18341	-0.497891	0.618561	0.959727	10144	6923	5725	2015	7015	8816
FBti0060320	26.4432	-0.150842	0.303631	-0.496794	0.619334	0.960052	43	36	28	4	29	51
FBti0063070	58.5791	0.111012	0.224603	0.494259	0.621123	0.960806	79	73	54	17	78	100
FBti0019844	92.4288	0.0866688	0.175381	0.494175	0.621183	0.960832	110	103	110	31	122	140
FBti0018868	12.4263	0.139803	0.285624	0.489467	0.624511	0.961003	2	18	18	3	28	17
FBti0019623	12.4263	0.139803	0.285624	0.489467	0.624511	0.961003	2	18	18	3	28	17
FBti0019632	43.6061	-0.123229	0.252136	-0.488739	0.625026	0.961003	65	49	54	11	52	69
FBti0020048	12.4263	0.139803	0.285624	0.489467	0.624511	0.961003	2	18	18	3	28	17
FBti0019287	5.65218	-0.145973	0.297674	-0.490378	0.623866	0.961003	13	5	5	2	6	6
FBti0018867	12.4263	0.139803	0.285624	0.489467	0.624511	0.961003	2	18	18	3	28	17
FBti0060330	65.374	0.0997077	0.202868	0.49149	0.62308	0.961003	71	90	67	23	78	107
FBti0060949	90.1088	0.0978902	0.199061	0.491761	0.622889	0.961003	118	107	84	38	115	118
FBti0061367	5.4071	0.144713	0.293112	0.493711	0.62151	0.961003	5	4	6	4	4	7
FBti0063578	6.78427	0.14518	0.294696	0.492643	0.622265	0.961003	12	6	4	1	9	18
FBti0059683	21.5804	-0.145969	0.296717	-0.491947	0.622757	0.961003	24	34	27	6	19	38
FBti0061737	14.72	-0.145364	0.30147	-0.482186	0.629674	0.961526	20	20	19	3	20	21
FBti0062802	11.9546	-0.149932	0.310626	-0.482678	0.629324	0.961526	20	16	13	2	17	17
FBti0019917	9.4265	0.149449	0.31228	0.478572	0.632243	0.961681	13	12	7	2	15	18
FBti0062972	9.76991	-0.149304	0.311266	-0.479668	0.631463	0.961681	7	16	16	3	13	10
FBti0060848	23.8678	-0.146518	0.306534	-0.477984	0.632662	0.961704	38	26	32	3	35	38
FBti0061418	7.19226	0.148109	0.310435	0.477103	0.633288	0.961704	8	8	6	4	7	11
FBti0062804	10.956	-0.149141	0.312082	-0.477892	0.632727	0.961704	20	11	12	4	15	9
FBti0063499	7.19226	0.148109	0.310435	0.477103	0.633288	0.961704	8	8	6	4	7	11
FBti0020224	5.55063	-0.0835644	0.175576	-0.475945	0.634114	0.961823	17	5	4	4	0	0
FBti0019622	41.0895	-0.134439	0.283234	-0.474657	0.635031	0.961891	60	53	49	7	68	54
FBti0019190	121.62	-0.148114	0.312195	-0.474427	0.635196	0.961988	144	138	194	45	210	44
FBti0060057	59.0352	0.147558	0.311929	0.473051	0.636177	0.962004	71	72	47	41	33	73
FBti0060358	6.08466	0.100534	0.213471	0.47095	0.637676	0.962004	4	4	7	7	4	0
FBti0061822	14.9087	-0.144425	0.305521	-0.472717	0.636415	0.962004	24	19	17	3	17	25
FBti0063104	13.4673	-0.140642	0.298606	-0.470995	0.637645	0.962004	6	39	12	4	17	14
FBti0063717	7.80015	-0.146591	0.309418	-0.473763	0.635669	0.962004	12	11	7	4	6	8
FBti0061749	7.7053	-0.145782	0.310371	-0.469703	0.638567	0.962462	11	9	12	1	12	10
FBti0019007	247.226	0.0845297	0.180328	0.468756	0.639244	0.96267	331	298	229	108	285	331
FBti0019486	8.51413	0.144127	0.308031	0.467897	0.639858	0.962746	9	8	8	6	8	9
FBti0019209	9.9923	0.144086	0.308983	0.466324	0.640983	0.962887	16	13	4	3	14	19
FBti0060080	6.17071	-0.125007	0.268217	-0.466066	0.641168	0.962887	7	15	6	0	4	16
FBti0019217	59.1433	-0.131428	0.283192	-0.464096	0.642579	0.96359	99	66	66	11	69	109
FBti0062847	18.3315	-0.141689	0.305242	-0.464187	0.642514	0.96359	24	31	17	12	10	11
FBti0063895	37.7427	0.117635	0.254245	0.462682	0.643592	0.964024	49	51	30	14	49	57
FBti0062066	6.02378	0.136781	0.297075	0.460426	0.645211	0.964772	3	6	9	3	10	6
FBti0062407	18.956	0.143104	0.310991	0.460154	0.645406	0.964833	24	16	20	10	29	16
FBti0020273	7.89096	-0.13063	0.285175	-0.458068	0.646904	0.964864	9	18	8	0	8	18
FBti0060312	211.228	-0.134618	0.293663	-0.458408	0.646659	0.964864	443	170	200	68	315	202
FBti0061229	8.39499	-0.141873	0.308716	-0.45956	0.645832	0.964864	12	15	6	4	6	10
FBti0061674	12.2668	-0.142012	0.310914	-0.456755	0.647847	0.964864	15	19	16	2	20	15
FBti0062211	125.192	0.0812071	0.177661	0.45709	0.647607	0.964864	148	141	145	48	137	201
FBti0063151	16.2905	0.0960654	0.210247	0.456916	0.647731	0.964864	0	7	34	13	26	4
FBti0062226	7.04674	-0.140254	0.30852	-0.454604	0.649394	0.96574	10	6	12	2	9	8
FBti0059769	26.0577	-0.132452	0.292065	-0.453504	0.650186	0.96574	44	28	30	6	38	34
FBti0148143	57.3951	0.119995	0.264755	0.453231	0.650383	0.965789	77	73	45	25	84	63
FBti0061490	8.28636	-0.13411	0.298003	-0.45003	0.652689	0.966316	8	7	19	1	10	14
FBti0019616	578.092	0.0673072	0.150697	0.446639	0.655136	0.967133	807	737	509	188	760	892
FBti0059859	17.7012	-0.131775	0.294853	-0.446918	0.654934	0.967133	27	23	20	4	24	25
FBti0063399	13.2575	0.135833	0.305356	0.444835	0.656439	0.967192	18	15	12	4	21	20
FBti0063450	59.0791	-0.0949437	0.213723	-0.444237	0.656871	0.967209	86	72	64	19	68	87
FBti0060570	18.4014	-0.132503	0.299249	-0.442786	0.657921	0.967349	22	23	27	11	18	5
FBti0063514	54.1597	0.0943195	0.21412	0.440499	0.659576	0.968048	59	73	55	21	73	73
FBti0061288	55.033	-0.101644	0.234235	-0.433943	0.66433	0.968826	80	62	63	20	56	81
FBti0062632	5.8345	-0.131938	0.304067	-0.43391	0.664354	0.968826	6	7	11	1	7	9
FBti0062808	7.03273	-0.13063	0.301557	-0.433186	0.664879	0.968941	12	4	12	2	7	10
FBti0062534	225.759	-0.0647897	0.1496	-0.433087	0.664951	0.968983	287	327	220	84	251	318
FBti0019833	121.474	0.0901208	0.208638	0.431948	0.66578	0.969056	181	129	116	38	159	198
FBti0019864	17.6835	0.134071	0.310983	0.431122	0.66638	0.969056	12	17	25	12	16	18
FBti0019713	99.5194	-0.0739244	0.171541	-0.430944	0.666509	0.969182	117	122	128	34	120	138
FBti0060481	28.7329	-0.12737	0.296319	-0.429841	0.667311	0.969584	49	36	29	5	44	41
FBti0061354	14.2267	0.133626	0.311001	0.429664	0.66744	0.969584	14	11	20	7	17	19
FBti0062052	93.0834	-0.093782	0.219553	-0.42715	0.66927	0.970058	138	95	113	32	101	137
FBti0019610	44.1951	0.113479	0.266199	0.426294	0.669893	0.970403	1	82	52	16	52	95
FBti0019634	13.0516	-0.103516	0.246004	-0.42079	0.673909	0.97184	18	21	17	4	0	29
FBti0018862	80.2412	-0.130799	0.311847	-0.419435	0.674898	0.97184	189	96	39	13	80	165
FBti0061452	6.92015	-0.123631	0.295387	-0.418539	0.675553	0.97184	11	11	8	0	8	15
FBti0062508	8.52246	0.131126	0.312177	0.420038	0.674458	0.97184	11	8	9	3	9	17
FBti0063090	5.30809	0.125692	0.299122	0.420202	0.674338	0.97184	8	4	4	3	7	6
FBti0020309	6.19282	-0.12214	0.29363	-0.415967	0.677434	0.972422	11	10	6	0	11	9
FBti0062035	29.435	-0.108563	0.262525	-0.413533	0.679216	0.97284	37	40	37	7	37	46
FBti0063977	93.8716	-0.0880988	0.212114	-0.415338	0.677895	0.97284	136	137	81	31	118	126
FBti0019139	13.325	-0.0775189	0.187947	-0.412452	0.680008	0.97309	17	0	41	0	12	28
FBti0019707	75.1391	0.0966077	0.236395	0.408671	0.682781	0.973244	104	82	70	34	95	91
FBti0060473	7.05953	0.0411056	0.101073	0.406691	0.684235	0.973781	0	0	11	11	0	0
FBti0060263	16.1887	0.119912	0.296264	0.404747	0.685664	0.974064	19	22	14	6	23	23
FBti0062798	12.3186	0.126527	0.31229	0.40516	0.68536	0.974064	15	9	15	6	19	12
FBti0020087	400.771	0.0779561	0.192772	0.404396	0.685921	0.974117	429	527	459	98	550	729
FBti0018912	213.361	0.0988817	0.248149	0.398478	0.690278	0.974778	257	249	223	114	228	228
FBti0061276	59.3552	-0.0991041	0.24894	-0.398104	0.690553	0.974778	71	82	70	20	90	59
FBti0063214	6.54465	0.123207	0.30867	0.399152	0.689781	0.974778	5	10	6	3	7	11
FBti0064184	14.9688	-0.122258	0.305876	-0.399698	0.689379	0.974778	24	20	13	6	16	18
FBti0063511	8.51668	-0.12311	0.310601	-0.396361	0.691839	0.974837	10	9	13	4	6	11
FBti0019498	38.9078	-0.0929264	0.235596	-0.394432	0.693262	0.974858	46	56	44	13	50	50
FBti0060378	10.0106	-0.123189	0.311478	-0.395498	0.692476	0.974858	11	14	14	3	14	11
FBti0062875	11.034	0.12166	0.30915	0.393532	0.693927	0.974858	10	15	12	4	16	16
FBti0020229	5.57336	-0.116087	0.297385	-0.390361	0.69627	0.975041	6	8	8	2	9	3
FBti0019603	1263.3	-0.0243641	0.0624908	-0.389882	0.696624	0.975041	1624	1640	1349	423	1576	1820
FBti0060637	21.1078	0.111512	0.285208	0.390984	0.695809	0.975041	20	29	22	9	26	30
FBti0062040	28.6079	0.113943	0.291531	0.390843	0.695913	0.975041	41	26	32	7	38	55
FBti0019203	7.24142	0.109914	0.283205	0.388106	0.697938	0.975143	8	8	8	0	20	11
FBti0060606	16.2573	-0.117465	0.302117	-0.388806	0.697419	0.975143	26	21	16	5	16	26
FBti0019614	37.0852	-0.0861588	0.222447	-0.387323	0.698517	0.975337	106	10	43	0	103	10
FBti0019748	40.8914	-0.0895735	0.231937	-0.386198	0.69935	0.975709	54	55	45	13	46	62
FBti0062906	12.15	0.118742	0.307541	0.386102	0.699421	0.975709	16	18	8	1	24	24
FBti0063975	94.585	-0.0735921	0.190777	-0.385749	0.699682	0.97575	125	120	100	39	107	118
FBti0062022	5.62627	-0.117409	0.304582	-0.385475	0.699885	0.975841	8	6	8	2	4	9
FBti0060075	18.0985	-0.119041	0.309724	-0.384345	0.700723	0.976029	31	28	12	6	17	28
FBti0061752	5.39235	0.107696	0.280017	0.384606	0.70053	0.976029	1	9	7	2	6	11
FBti0020034	43.5601	-0.0924536	0.242011	-0.382022	0.702445	0.976756	61	60	46	11	63	59
FBti0020310	25.9443	-0.101693	0.26675	-0.381229	0.703034	0.976883	33	39	27	8	33	35
FBti0019741	21.4883	-0.112764	0.296833	-0.37989	0.704027	0.977255	27	26	28	8	17	35
FBti0019011	13.6461	-0.114677	0.304228	-0.376945	0.706214	0.97788	32	16	6	6	13	14
FBti0060872	27.482	-0.109646	0.291787	-0.375774	0.707085	0.97788	36	36	35	6	27	53
FBti0063406	58.7796	0.0769711	0.204513	0.376363	0.706647	0.97788	75	72	58	22	72	88
FBti0063437	9.73218	-0.117624	0.311826	-0.377212	0.706016	0.97788	12	15	12	2	15	12
FBti0063238	11.8815	-0.11389	0.303535	-0.375212	0.707503	0.977884	18	6	23	2	16	18
FBti0020149	44.9462	-0.111421	0.297288	-0.37479	0.707816	0.977982	53	57	59	19	27	74
FBti0060143	8.32283	-0.115852	0.311504	-0.371911	0.709959	0.978368	9	11	12	3	12	7
FBti0020242	26.3394	-0.0952085	0.26443	-0.360051	0.718809	0.978738	35	35	30	8	30	40
FBti0020239	26.3394	-0.0952085	0.26443	-0.360051	0.718809	0.978738	35	35	30	8	30	40
FBti0019031	10.804	-0.067456	0.185627	-0.363396	0.716309	0.978738	5	25	19	0	0	35
FBti0020060	230.076	0.112947	0.312142	0.361846	0.717467	0.978738	183	232	338	148	296	108
FBti0019907	76.8344	-0.0782326	0.213589	-0.366277	0.714159	0.978738	105	83	93	30	84	103
FBti0020403	21.5685	-0.108415	0.300714	-0.360525	0.718454	0.978738	31	31	24	3	30	37
FBti0060167	6.92866	-0.111078	0.306245	-0.362709	0.716822	0.978738	7	7	13	2	10	7
FBti0060384	5.40556	-0.112276	0.307032	-0.365683	0.714601	0.978738	7	7	8	1	7	8
FBti0061074	512.261	0.0765668	0.207571	0.368871	0.712224	0.978738	796	547	450	213	620	677
FBti0061183	7.98582	-0.105016	0.292037	-0.359598	0.719148	0.978738	16	11	7	0	12	15
FBti0062159	10.62	0.114162	0.312274	0.365581	0.714678	0.978738	9	16	12	2	16	21
FBti0063150	28.5422	0.0949644	0.262739	0.36144	0.71777	0.978738	28	39	32	10	36	45
FBti0063492	7.74091	0.11309	0.309068	0.365905	0.714436	0.978738	8	11	8	1	11	18
FBti0020421	27.7648	0.0844611	0.235674	0.35838	0.720059	0.978916	0	48	36	7	23	84
FBti0019582	35.9232	-0.110213	0.307861	-0.357998	0.720345	0.979069	36	32	66	14	28	55
FBti0062220	9.44371	-0.110318	0.308994	-0.357022	0.721075	0.979174	19	7	10	4	9	11
FBti0020375	8.75686	0.0761965	0.214243	0.355654	0.7221	0.979619	2	0	22	2	16	18
FBti0018888	15.1749	-0.110762	0.312278	-0.354692	0.722821	0.980033	33	14	12	5	18	19
FBti0061273	17.0232	-0.106512	0.301455	-0.353327	0.723843	0.98033	19	29	19	4	19	29
FBti0062671	5.91569	-0.108705	0.307854	-0.353105	0.72401	0.980344	10	6	7	2	7	7
FBti0020264	199.877	0.051742	0.149274	0.346623	0.728874	0.980378	259	239	204	79	225	297
FBti0020385	35.3227	-0.105339	0.304102	-0.346396	0.729045	0.980378	67	32	37	9	34	65
FBti0019026	61.7655	0.0891491	0.257576	0.346107	0.729262	0.980378	75	76	58	32	64	76
FBti0020433	10.174	0.108337	0.306979	0.352914	0.724153	0.980378	19	9	6	3	20	12
FBti0061409	8.26442	0.105459	0.30425	0.346619	0.728877	0.980378	7	10	8	6	8	7
FBti0062458	20.0651	0.101741	0.292535	0.34779	0.727998	0.980378	21	23	23	9	20	32
FBti0062479	12.3158	-0.108297	0.308065	-0.351538	0.725184	0.980378	18	13	16	4	13	18
FBti0062631	5.34854	0.0971707	0.276178	0.351841	0.724958	0.980378	2	10	4	4	4	6
FBti0059860	173.749	0.07465	0.215679	0.346116	0.729256	0.980378	270	191	150	60	248	236
FBti0019597	89.3977	0.0957129	0.282221	0.339142	0.734503	0.980398	87	97	116	49	76	116
FBti0019088	258.902	0.0705433	0.208022	0.339115	0.734523	0.980398	394	248	263	95	296	411
FBti0019096	437.265	0.10605	0.312294	0.339584	0.73417	0.980398	852	254	346	302	294	416
FBti0018998	9.90616	-0.105092	0.312279	-0.336534	0.736468	0.980398	10	12	17	2	13	15
FBti0019012	14.2678	0.096624	0.287481	0.336106	0.736791	0.980398	24	21	3	3	13	40
FBti0018990	38.198	0.0893302	0.263114	0.339511	0.734225	0.980398	33	69	22	0	91	82
FBti0060517	5.33228	0.101231	0.299999	0.337439	0.735786	0.980398	7	4	7	1	7	12
FBti0060553	6.81735	-0.0979839	0.286299	-0.342243	0.732168	0.980398	15	8	6	0	10	13
FBti0060568	8.92701	-0.106998	0.311716	-0.343256	0.731406	0.980398	11	16	9	2	8	17
FBti0061718	58.4135	0.0838449	0.247896	0.338226	0.735193	0.980398	78	58	63	26	60	87
FBti0063408	32.4681	-0.0956846	0.279473	-0.342375	0.732069	0.980398	53	44	27	10	44	41
FBti0059816	6.35678	-0.104084	0.304928	-0.34134	0.732847	0.980398	8	10	8	1	12	6
FBti0059854	17.5862	-0.101636	0.299465	-0.339393	0.734313	0.980398	10	36	22	11	13	10
FBti0063257	16.6518	0.103383	0.308873	0.334711	0.737843	0.980888	21	13	23	4	26	28
FBti0059764	43.4252	0.0836196	0.251499	0.332485	0.739523	0.980946	52	64	36	16	62	57
FBti0019520	5.30975	0.089423	0.271983	0.328782	0.742321	0.981026	8	9	1	1	6	14
FBti0020162	19.1431	0.100365	0.304911	0.329162	0.742033	0.981026	20	26	22	3	32	35
FBti0020076	22.4094	-0.100534	0.306572	-0.32793	0.742964	0.981026	19	12	53	8	28	23
FBti0020402	151.171	0.058392	0.178022	0.328003	0.742909	0.981026	218	170	148	50	206	219
FBti0060250	5.57434	-0.0751704	0.227928	-0.329799	0.741552	0.981026	11	4	7	4	4	0
FBti0061442	241.943	0.0400863	0.121302	0.330468	0.741046	0.981026	313	304	246	84	292	372
FBti0060639	11.5261	0.0934233	0.286537	0.326043	0.744392	0.981285	4	23	12	1	25	21
FBti0061773	16.8513	-0.0916181	0.28242	-0.324404	0.745632	0.981666	36	15	18	0	27	32
FBti0064037	8.09076	0.0986645	0.307119	0.321258	0.748015	0.982092	10	5	12	2	10	17
FBti0020018	21.461	-0.0956025	0.307587	-0.310815	0.755942	0.982183	31	35	19	4	22	43
FBti0019089	7.90417	0.0781388	0.251264	0.310983	0.755814	0.982183	17	6	3	0	11	25
FBti0020078	80.9856	-0.0704953	0.224104	-0.314565	0.753092	0.982183	110	80	108	27	102	109
FBti0019720	74.1072	-0.0683498	0.213201	-0.320588	0.748522	0.982183	104	82	89	23	103	95
FBti0019098	7.37594	0.0442774	0.142663	0.310363	0.756285	0.982183	0	0	18	0	17	21
FBti0019373	66.8377	0.0955697	0.307783	0.31051	0.756173	0.982183	41	137	47	49	40	62
FBti0019951	10.3595	0.0974344	0.311977	0.312312	0.754803	0.982183	11	15	9	4	8	22
FBti0020416	242.018	0.071628	0.228208	0.313871	0.753619	0.982183	232	294	324	58	337	438
FBti0060740	7.18392	-0.0932909	0.293438	-0.317923	0.750543	0.982183	10	10	10	0	15	9
FBti0061408	18.129	-0.0963997	0.308067	-0.312918	0.754343	0.982183	17	20	31	6	25	20
FBti0062206	38.7645	-0.0822017	0.26358	-0.311866	0.755142	0.982183	60	44	44	9	53	59
FBti0062231	52.2815	-0.0955439	0.306761	-0.31146	0.755451	0.982183	60	95	46	21	29	93
FBti0062584	18.7493	0.09092	0.294302	0.308934	0.757372	0.982183	12	46	6	7	37	17
FBti0063369	13.2518	0.0975351	0.311822	0.312791	0.754439	0.982183	12	20	15	2	22	25
FBti0063452	17.2331	-0.0937423	0.301377	-0.311047	0.755765	0.982183	24	20	19	8	18	19
FBti0019698	208.378	-0.0450314	0.146359	-0.307678	0.758328	0.982429	281	255	237	59	258	331
FBti0020417	222.067	0.061514	0.201796	0.304832	0.760494	0.982595	231	246	303	67	266	390
FBti0019680	49.7234	0.0833284	0.276496	0.301373	0.76313	0.982847	64	64	41	26	49	63
FBti0019447	77.4336	-0.0680003	0.224867	-0.302403	0.762345	0.982847	211	63	49	49	67	0
FBti0019293	37.9813	-0.0909025	0.301805	-0.301196	0.763265	0.982933	26	110	20	7	75	34
FBti0019985	54.5323	-0.0883432	0.294864	-0.299606	0.764477	0.98298	65	63	74	23	80	39
FBti0062898	8.77364	0.0936389	0.312268	0.299867	0.764279	0.98298	11	10	8	4	9	14
FBti0020025	66.4401	-0.0891472	0.302352	-0.294846	0.768111	0.983766	104	92	62	8	99	121
FBti0061446	239.674	0.0364671	0.123116	0.296202	0.767076	0.983766	299	295	259	85	277	375
FBti0062691	11.0542	-0.0918214	0.309203	-0.296962	0.766496	0.983766	14	17	12	3	12	18
FBti0059775	140.295	0.0515449	0.174788	0.2949	0.76807	0.983766	155	188	162	38	183	239
FBti0020243	22.2812	-0.0871722	0.298312	-0.292218	0.77012	0.984206	53	14	20	7	9	48
FBti0020086	146.979	-0.0625005	0.214764	-0.291019	0.771037	0.984206	224	121	258	0	224	279
FBti0020393	104.373	0.0476716	0.16461	0.289604	0.77212	0.984206	123	132	110	42	128	142
FBti0061032	5.93619	0.0895308	0.307485	0.291171	0.770921	0.984206	8	6	6	2	6	12
FBti0063965	9.0811	0.091267	0.312094	0.292434	0.769955	0.984206	9	10	11	4	10	14
FBti0059941	5.71187	0.088997	0.30649	0.290375	0.771529	0.984206	6	7	7	1	8	12
FBti0019715	56.0778	0.0658465	0.228031	0.288761	0.772764	0.984331	63	72	58	25	59	81
FBti0020212	15.4157	-0.083251	0.291851	-0.285252	0.775451	0.984331	8	31	20	10	6	14
FBti0019179	11.4604	0.0287623	0.101379	0.283711	0.776632	0.984331	0	28	0	16	0	0
FBti0019212	82.3965	0.0847246	0.29861	0.28373	0.776618	0.984331	140	83	64	23	76	186
FBti0018959	82.3965	0.0847246	0.29861	0.28373	0.776618	0.984331	140	83	64	23	76	186
FBti0018960	82.3965	0.0847246	0.29861	0.28373	0.776618	0.984331	140	83	64	23	76	186
FBti0060454	6.13287	-0.0517113	0.179137	-0.288669	0.772835	0.984331	13	14	0	4	0	5
FBti0061906	24.3068	-0.0877866	0.306072	-0.286817	0.774253	0.984331	43	34	17	7	24	42
FBti0059657	100.996	0.061898	0.21652	0.285876	0.774973	0.984331	142	138	81	32	133	158
FBti0020251	135.75	0.0617799	0.232909	0.265254	0.790814	0.984427	114	197	167	48	144	234
FBti0020221	53.9632	-0.0698074	0.261091	-0.267368	0.789186	0.984427	78	59	67	12	65	96
FBti0020225	5.86641	-0.0546812	0.196628	-0.278095	0.780939	0.984427	8	0	16	0	10	9
FBti0019710	96.906	0.0672966	0.244789	0.274917	0.78338	0.984427	144	119	83	25	158	140
FBti0019539	35.3587	-0.0841984	0.307532	-0.273788	0.784248	0.984427	45	19	68	13	60	19
FBti0019044	85.6739	-0.0558555	0.202874	-0.275321	0.78307	0.984427	88	133	98	27	101	131
FBti0020154	6.07362	0.0537202	0.200888	0.267414	0.78915	0.984427	6	14	0	0	13	15
FBti0020144	96.4807	-0.0669631	0.242625	-0.275994	0.782553	0.984427	132	143	82	41	117	104
FBti0019386	34.9948	-0.0770285	0.288149	-0.267321	0.789222	0.984427	51	52	33	6	55	53
FBti0019845	43.7879	-0.0671685	0.253163	-0.265318	0.790765	0.984427	55	55	49	19	40	62
FBti0060179	47.0916	0.0665462	0.244384	0.272302	0.78539	0.984427	62	57	44	20	49	72
FBti0061261	23.218	0.079406	0.29337	0.270668	0.786646	0.984427	31	34	18	6	37	35
FBti0062126	15.3767	0.0861298	0.309613	0.278186	0.78087	0.984427	11	18	22	7	18	21
FBti0062414	44.5633	0.0713592	0.260274	0.274169	0.783955	0.984427	64	50	44	13	51	83
FBti0062654	6.4789	0.0844354	0.308495	0.273701	0.784314	0.984427	8	8	7	1	9	14
FBti0062700	21.5818	0.0793468	0.292699	0.271087	0.786324	0.984427	27	20	26	9	30	26
FBti0064039	6.4808	0.0803343	0.303707	0.264512	0.791385	0.984427	10	4	7	3	6	11
FBti0059682	79.085	-0.054671	0.195137	-0.280168	0.779349	0.984427	87	102	102	26	106	103
FBti0059734	743.191	0.0446556	0.16339	0.273307	0.784618	0.984427	726	1028	886	259	1095	919
FBti0059791	24.0578	0.0762317	0.278898	0.273331	0.784598	0.984427	26	32	28	6	33	42
FBti0020145	47.9151	0.0812739	0.310602	0.261666	0.793579	0.984807	25	60	75	25	44	64
FBti0061710	11.5749	0.0816622	0.312279	0.261504	0.793704	0.984807	12	12	13	7	13	11
FBti0020379	8.24564	0.0554762	0.21374	0.25955	0.795211	0.984948	2	0	22	2	13	17
FBti0018894	7.30721	0.078525	0.303636	0.258615	0.795932	0.984948	10	10	6	1	8	19
FBti0061669	11.0941	-0.0801399	0.307816	-0.26035	0.794594	0.984948	17	11	12	7	8	9
FBti0061472	28.9717	0.0760383	0.294748	0.257977	0.796425	0.984995	27	51	26	7	44	48
FBti0062905	63.502	0.0551061	0.215289	0.255964	0.797979	0.985069	79	87	59	23	71	103
FBti0059646	14.3253	0.0791883	0.308623	0.256585	0.797499	0.985069	17	12	19	6	15	23
FBti0061015	17.9712	0.0790864	0.311826	0.253624	0.799786	0.985546	27	24	13	2	37	29
FBti0062444	5.43136	0.0736551	0.290636	0.253427	0.799938	0.985546	5	4	8	3	3	10
FBti0060487	14.5894	0.0767116	0.30499	0.251522	0.801411	0.985632	28	17	6	3	17	34
FBti0019601	31.6162	0.0712379	0.287316	0.247942	0.804179	0.986448	47	36	25	15	37	39
FBti0062993	6.64716	-0.0763241	0.307789	-0.247976	0.804153	0.986448	7	13	6	2	10	7
FBti0062005	13.0076	-0.0753887	0.306001	-0.246367	0.805398	0.986685	14	17	18	4	18	16
FBti0060363	475.657	0.0268477	0.109666	0.244814	0.806601	0.986844	621	601	491	152	583	757
FBti0019656	7.96194	0.0745313	0.311368	0.239367	0.810821	0.986878	12	8	7	3	13	9
FBti0020304	5.54251	0.0676662	0.282358	0.239646	0.810605	0.986878	5	12	2	2	11	5
FBti0018979	10.5378	-0.0726983	0.311517	-0.233368	0.815475	0.986878	11	22	9	2	17	14
FBti0019503	7.55061	0.0730468	0.302311	0.241628	0.809069	0.986878	3	10	12	3	9	12
FBti0060056	37.4622	-0.0753174	0.311842	-0.241524	0.809149	0.986878	51	39	54	3	78	48
FBti0060340	17.5901	0.0720306	0.304122	0.236847	0.812775	0.986878	26	22	15	4	30	26
FBti0061227	13.327	0.075653	0.311764	0.242661	0.808268	0.986878	18	17	13	2	18	29
FBti0063276	24.1433	-0.0664081	0.282493	-0.235079	0.814148	0.986878	24	34	30	10	28	29
FBti0059713	79.9348	0.0698115	0.298029	0.234244	0.814795	0.986878	136	48	89	34	91	112
FBti0019018	5.59826	0.0455536	0.201946	0.225573	0.821533	0.987265	6	13	0	0	13	12
FBti0018926	11.5581	0.0699882	0.30915	0.226389	0.820899	0.987265	16	13	12	3	15	21
FBti0060109	32.9555	0.0699112	0.308403	0.226688	0.820667	0.987265	40	25	44	19	33	34
FBti0061258	13.5426	-0.0703238	0.311013	-0.226112	0.821114	0.987265	24	12	16	3	26	12
FBti0061385	16.0793	-0.0708812	0.311371	-0.227643	0.819924	0.987265	19	20	21	6	10	30
FBti0063166	5.94515	0.0532124	0.232911	0.228467	0.819283	0.987265	14	6	0	1	13	9
FBti0063370	6.28481	-0.0688044	0.307426	-0.223808	0.822907	0.987265	11	7	7	1	8	11
FBti0063991	20.3642	0.0698183	0.310521	0.224843	0.822102	0.987265	33	18	21	4	25	44
FBti0059729	7.0362	-0.0317765	0.141177	-0.225083	0.821915	0.987265	0	18	13	0	21	0
FBti0019001	231.089	0.049678	0.222842	0.22293	0.82359	0.987479	292	254	267	87	204	419
FBti0018955	19.0023	-0.0660646	0.302459	-0.218425	0.827098	0.987891	28	27	17	6	17	34
FBti0019157	15.8937	0.0503411	0.232159	0.216839	0.828334	0.988061	15	0	34	3	33	25
FBti0019036	14.1304	0.0621696	0.287544	0.216209	0.828825	0.988061	13	15	18	8	26	3
FBti0062955	9.7004	0.0675703	0.311944	0.216611	0.828512	0.988061	14	11	9	3	11	18
FBti0020117	42.2476	0.0563165	0.261631	0.215251	0.829571	0.988157	50	41	56	15	62	53
FBti0061872	6.84662	-0.0665119	0.309916	-0.214613	0.830069	0.988276	6	9	11	2	9	9
FBti0060945	58.5967	-0.0497032	0.23193	-0.214302	0.830311	0.988294	79	87	54	17	68	96
FBti0062611	5.99566	0.0421698	0.197453	0.213569	0.830883	0.988463	0	15	5	0	12	15
FBti0020232	15.916	0.0661163	0.310087	0.213218	0.831157	0.988574	26	16	15	3	26	27
FBti0061207	31.7582	0.0546853	0.258848	0.211264	0.832681	0.988574	44	35	32	12	41	44
FBti0019348	118.419	-0.0573094	0.27174	-0.210898	0.832967	0.988578	90	149	196	35	141	187
FBti0018952	253.216	0.0350258	0.166207	0.210736	0.833093	0.988578	347	311	251	80	290	434
FBti0018923	8.30112	-0.0655356	0.312107	-0.209978	0.833685	0.988631	11	11	10	2	14	9
FBti0020039	35.4835	-0.0201238	0.101707	-0.197859	0.843155	0.988729	105	61	0	0	100	0
FBti0019745	34.4227	-0.0609475	0.30787	-0.197965	0.843073	0.988729	62	49	19	13	46	37
FBti0019303	40.8156	0.0552498	0.270935	0.203923	0.838414	0.988729	49	50	43	17	35	71
FBti0019390	53.1788	0.0635327	0.310619	0.204536	0.837935	0.988729	58	17	101	17	81	76
FBti0018907	24.5408	0.0636356	0.312294	0.203768	0.838535	0.988729	32	18	35	5	24	60
FBti0020404	73.2833	0.040522	0.204279	0.198366	0.842759	0.988729	92	92	82	19	97	124
FBti0060252	17.3952	0.0581464	0.284856	0.204125	0.838256	0.988729	16	22	22	0	38	35
FBti0060297	8.49445	-0.0646618	0.311055	-0.207879	0.835323	0.988729	9	15	10	1	13	14
FBti0060373	6.76725	-0.0636642	0.31085	-0.204807	0.837723	0.988729	11	9	6	2	8	10
FBti0060721	10.0763	-0.06289	0.31228	-0.20139	0.840394	0.988729	17	9	12	3	11	16
FBti0061728	6.93628	0.0632413	0.305515	0.206999	0.83601	0.988729	9	10	6	1	15	9
FBti0062037	7.57195	-0.0605	0.291498	-0.207549	0.835582	0.988729	9	12	8	3	2	16
FBti0062353	29.4741	-0.0555951	0.273863	-0.203004	0.839132	0.988729	36	49	27	8	39	44
FBti0062375	6.89756	-0.0617687	0.308444	-0.200259	0.841278	0.988729	8	7	11	2	11	7
FBti0062985	8.10947	-0.0602976	0.303825	-0.198462	0.842684	0.988729	15	13	4	2	8	15
FBti0063079	19.2675	0.0624857	0.301569	0.207202	0.835852	0.988729	11	48	10	4	37	28
FBti0063136	7.17276	-0.061195	0.307917	-0.198739	0.842467	0.988729	9	6	12	2	11	8
FBti0019191	116.209	0.0613449	0.311703	0.196806	0.843979	0.988825	96	117	178	76	137	50
FBti0019294	90.4574	0.0385605	0.196668	0.196069	0.844556	0.988845	115	94	108	35	112	124
FBti0019820	26.5496	0.0612405	0.312216	0.196148	0.844495	0.988845	33	33	24	15	12	45
FBti0019398	28.5218	0.0365216	0.187331	0.194958	0.845426	0.988845	0	32	56	0	52	79
FBti0019252	13.5186	-0.0609983	0.311398	-0.195885	0.8447	0.988845	10	20	20	5	18	15
FBti0062674	5.35777	0.0537309	0.274542	0.195711	0.844836	0.988845	10	4	4	2	2	14
FBti0020077	47.4135	0.0432873	0.2315	0.186986	0.851671	0.989657	0	102	56	20	99	26
FBti0020295	15.4605	-0.0568828	0.30496	-0.186526	0.852032	0.989657	20	24	16	3	19	28
FBti0019358	46.8242	0.0588405	0.312291	0.188416	0.850551	0.989657	71	66	26	24	73	28
FBti0019400	26.6624	-0.0594419	0.311703	-0.190701	0.84876	0.989657	27	65	12	9	31	37
FBti0060579	8.62322	0.0564239	0.300721	0.187629	0.851168	0.989657	12	16	3	2	15	13
FBti0061740	9.94031	0.0583665	0.312181	0.186963	0.851689	0.989657	12	14	9	3	19	10
FBti0062420	17.4627	-0.0587631	0.311555	-0.188612	0.850397	0.989657	23	18	21	10	13	19
FBti0063054	18.9571	-0.0568871	0.300692	-0.189187	0.849946	0.989657	21	19	29	7	24	23
FBti0019735	105.923	0.0532003	0.289755	0.183604	0.854324	0.989699	110	10	223	26	146	207
FBti0019898	1100.76	0.0233536	0.126595	0.184475	0.853641	0.989699	1423	1318	1185	441	1357	1398
FBti0019474	60.7779	0.037107	0.199913	0.185616	0.852746	0.989699	77	79	62	20	75	95
FBti0060741	5.64244	-0.0562606	0.303652	-0.18528	0.85301	0.989699	7	6	9	1	6	11
FBti0061077	12.4583	0.0568015	0.310554	0.182904	0.854874	0.989699	12	17	16	1	25	21
FBti0062550	11.4654	-0.0569737	0.312053	-0.182577	0.85513	0.989699	14	12	18	2	16	19
FBti0059814	8.86784	0.0574715	0.312295	0.18403	0.85399	0.989699	11	12	8	3	15	10
FBti0062333	642.302	-0.01734	0.0953139	-0.181925	0.855642	0.98981	845	828	665	221	759	959
FBti0020233	7.00042	-0.0545439	0.302598	-0.180252	0.856955	0.990018	11	7	7	4	4	9
FBti0019829	15.9453	-0.0537419	0.305945	-0.175659	0.860562	0.990018	19	16	23	6	22	17
FBti0019406	51.188	0.0549394	0.311777	0.176214	0.860126	0.990018	24	70	80	26	77	34
FBti0019454	35.6871	-0.0492885	0.274069	-0.17984	0.857278	0.990018	42	66	33	0	81	50
FBti0019458	14.8962	-0.0554957	0.312198	-0.177758	0.858913	0.990018	11	25	18	8	11	18
FBti0019847	6.14065	0.0534203	0.305524	0.174848	0.861199	0.990018	5	6	10	2	7	11
FBti0020424	20.6938	-0.0515085	0.28601	-0.180093	0.857079	0.990018	27	22	27	7	25	29
FBti0060560	7.05062	-0.0559619	0.311242	-0.179802	0.857308	0.990018	7	12	8	2	10	9
FBti0060500	14.3174	0.049913	0.296168	0.168529	0.866167	0.990499	23	22	5	6	7	32
FBti0061353	9.34222	0.051112	0.304421	0.167899	0.866662	0.990499	17	12	4	3	9	19
FBti0062387	16.0262	0.0528055	0.312236	0.169121	0.865702	0.990499	28	19	11	3	22	32
FBti0062731	33.6322	-0.0514061	0.298967	-0.171946	0.86348	0.990499	51	29	42	14	27	53
FBti0063180	28.8322	-0.0440925	0.25751	-0.171226	0.864046	0.990499	33	41	33	9	38	40
FBti0063537	14.6894	0.0526281	0.310428	0.169534	0.865377	0.990499	20	16	17	1	22	34
FBti0064044	12.0166	0.0523581	0.311965	0.167834	0.866714	0.990499	10	13	17	6	14	14
FBti0020240	8.22159	-0.0511305	0.306718	-0.166702	0.867604	0.990716	16	10	5	3	12	8
FBti0020278	14.9145	0.0466539	0.280326	0.166428	0.867821	0.990757	23	20	10	0	24	39
FBti0060471	5.94025	-0.0383061	0.235379	-0.162743	0.870721	0.992105	18	3	3	0	5	17
FBti0019350	221.284	-0.0282479	0.175868	-0.16062	0.872393	0.99256	250	269	292	61	272	368
FBti0062728	9.45491	-0.0500477	0.311319	-0.16076	0.872282	0.99256	15	16	6	2	13	15
FBti0019077	32.0203	-0.0480549	0.30776	-0.156144	0.875919	0.993378	58	22	38	10	32	55
FBti0063979	84.0905	0.0276635	0.177345	0.155987	0.876043	0.993378	107	105	86	32	102	119
FBti0020244	27.8972	-0.041	0.28371	-0.144514	0.885095	0.994049	45	28	29	10	31	41
FBti0019613	70.0222	-0.0279295	0.189356	-0.147497	0.882739	0.994049	92	93	71	24	88	98
FBti0019677	17.8423	0.0446668	0.306519	0.145723	0.88414	0.994049	21	22	17	10	16	22
FBti0020308	11.3279	0.0435168	0.302262	0.14397	0.885524	0.994049	23	6	11	2	15	24
FBti0020392	9.68415	0.0456914	0.312035	0.14643	0.883582	0.994049	10	12	13	2	15	16
FBti0060270	6.73639	-0.0457642	0.304206	-0.150438	0.880419	0.994049	5	7	13	2	8	10
FBti0060357	21.5479	-0.0451891	0.312277	-0.144708	0.884941	0.994049	33	37	11	9	17	34
FBti0061759	12.6796	0.0469541	0.312257	0.15037	0.880472	0.994049	19	11	13	6	10	21
FBti0061958	8.55086	-0.047282	0.311494	-0.151791	0.879352	0.994049	15	10	7	3	8	14
FBti0063007	71.6437	0.0385674	0.257083	0.150019	0.880749	0.994049	109	80	66	25	70	129
FBti0063728	30.2649	0.0408289	0.276531	0.147646	0.882622	0.994049	36	44	29	9	50	37
FBti0063239	60.3651	-0.0296137	0.208218	-0.142225	0.886902	0.994445	78	68	74	20	74	88
FBti0019180	10.5035	-0.0248109	0.178371	-0.139097	0.889374	0.994917	0	21	20	6	0	16
FBti0060818	6.51213	-0.0420638	0.303797	-0.13846	0.889877	0.994917	6	6	12	2	10	7
FBti0019554	1576.03	-0.0159831	0.117286	-0.136275	0.891604	0.995314	2106	1826	1772	582	2019	2013
FBti0061200	18.8128	0.0397234	0.294311	0.134971	0.892635	0.995314	20	24	23	6	20	34
FBti0061764	21.1808	0.038149	0.28285	0.134874	0.892712	0.995314	24	25	27	6	30	32
FBti0061862	5.38602	0.040781	0.302204	0.134945	0.892655	0.995314	7	9	3	2	6	9
FBti0059741	25.8248	-0.0393007	0.290545	-0.135265	0.892402	0.995314	25	34	37	7	28	46
FBti0060202	25.9761	0.0134307	0.101818	0.131909	0.895056	0.99583	78	0	0	31	0	0
FBti0019567	7.36064	0.0347613	0.273564	0.127068	0.898886	0.995924	4	15	8	0	13	17
FBti0019620	39.6436	0.0290564	0.239694	0.121223	0.903514	0.995924	67	0	63	16	58	47
FBti0020107	294.724	-0.0225494	0.192817	-0.116947	0.906902	0.995924	365	331	362	129	338	342
FBti0020063	8.39376	-0.0160134	0.135261	-0.118389	0.905759	0.995924	0	5	27	0	28	0
FBti0019742	9.86154	-0.0364021	0.31227	-0.116572	0.907199	0.995924	10	17	11	2	12	18
FBti0020184	64.9969	-0.0350718	0.267244	-0.131235	0.895589	0.995924	102	134	17	52	33	11
FBti0019300	39.6436	0.0290564	0.239694	0.121223	0.903514	0.995924	67	0	63	16	58	47
FBti0019285	111.058	0.0351744	0.294273	0.11953	0.904856	0.995924	172	135	94	17	172	215
FBti0019201	7.36064	0.0347613	0.273564	0.127068	0.898886	0.995924	4	15	8	0	13	17
FBti0019905	52.1728	-0.0317651	0.265555	-0.119618	0.904786	0.995924	73	68	47	24	47	72
FBti0019021	34.0044	-0.0279518	0.239041	-0.116933	0.906913	0.995924	44	33	50	20	0	55
FBti0060000	6.76896	0.0357434	0.278333	0.128419	0.897817	0.995924	1	12	10	3	9	8
FBti0060228	6.73586	0.0360535	0.308998	0.116679	0.907115	0.995924	8	10	7	1	9	14
FBti0060460	6.48804	0.0377444	0.308638	0.122293	0.902667	0.995924	10	6	6	3	7	9
FBti0061600	6.24732	0.0357074	0.309008	0.115555	0.908005	0.995924	8	6	7	3	7	8
FBti0062132	28.6379	0.0377701	0.294939	0.128061	0.898101	0.995924	41	32	27	12	44	27
FBti0062719	5.53031	-0.031962	0.260978	-0.12247	0.902527	0.995924	8	7	7	0	3	18
FBti0063517	45.9845	-0.0283808	0.236504	-0.120001	0.904482	0.995924	64	59	47	14	52	76
FBti0019080	165.111	0.0336547	0.303372	0.110935	0.911668	0.996027	272	253	71	76	182	200
FBti0020188	5.40148	0.0320689	0.290551	0.110373	0.912114	0.996027	6	3	10	1	7	11
FBti0018908	17.9956	-0.0353947	0.312231	-0.113361	0.909745	0.996027	28	13	23	9	12	26
FBti0060416	8.30197	-0.0285775	0.254323	-0.112367	0.910533	0.996027	12	2	15	6	2	8
FBti0060831	12.1374	-0.0346427	0.311096	-0.111357	0.911333	0.996027	16	11	16	6	17	8
FBti0019365	94.8118	-0.0288821	0.263594	-0.10957	0.91275	0.996045	100	133	125	0	118	256
FBti0059916	6.00976	-0.0308592	0.285279	-0.108172	0.913859	0.996045	12	7	5	0	10	12
FBti0059761	63.4532	-0.023129	0.21641	-0.106876	0.914887	0.996225	79	70	83	19	80	97
FBti0062675	6.25147	0.0318956	0.299968	0.10633	0.915321	0.99632	12	7	4	1	11	10
FBti0059837	11.5074	-0.031854	0.312278	-0.102005	0.918753	0.99706	9	19	16	2	17	19
FBti0019042	628.275	0.0106788	0.10517	0.101539	0.919123	0.997179	766	765	739	191	788	1000
FBti0061326	7.81996	-0.0298315	0.297515	-0.100269	0.920131	0.99738	10	12	9	0	12	17
FBti0020112	33.3592	-0.0266885	0.273301	-0.0976522	0.922208	0.997392	42	28	54	0	51	79
FBti0019502	65.8614	-0.0248335	0.254792	-0.0974659	0.922356	0.997392	85	77	83	13	90	117
FBti0063429	6.10898	-0.0286385	0.290167	-0.0986968	0.921379	0.997392	8	7	9	0	13	9
FBti0059665	240.566	0.0199007	0.203515	0.0977848	0.922103	0.997392	325	238	292	86	248	401
FBti0059693	192.525	-0.0293498	0.29783	-0.0985455	0.921499	0.997392	226	325	170	27	249	415
FBti0019401	57.9593	-0.0200053	0.209463	-0.0955077	0.923912	0.997413	116	114	0	1	101	117
FBti0061704	31.0103	-0.0252565	0.262013	-0.0963942	0.923207	0.997413	34	36	42	11	38	43
FBti0061988	9.19079	0.0300869	0.311449	0.096603	0.923042	0.997413	10	7	15	3	11	15
FBti0060531	6.28158	0.0265347	0.279522	0.0949287	0.924371	0.997587	12	9	1	3	7	8
FBti0064311	13.8136	0.0281248	0.312229	0.0900775	0.928226	0.998771	23	18	9	4	24	16
FBti0020136	128.502	0.0232213	0.25878	0.0897338	0.928499	0.998809	126	190	141	58	102	204
FBti0061041	20.4168	0.0270151	0.309132	0.0873901	0.930361	0.99887	38	18	16	8	25	28
FBti0062056	19.163	0.026793	0.305551	0.0876875	0.930125	0.99887	33	21	15	6	22	33
FBti0019165	46.1753	-0.0257687	0.308147	-0.0836246	0.933355	0.999081	28	61	76	22	42	58
FBti0060711	12.0105	0.0114739	0.13513	0.0849099	0.932333	0.999081	0	35	7	0	49	0
FBti0062423	94.231	0.0159099	0.188976	0.0841903	0.932905	0.999081	105	142	97	28	121	149
FBti0063590	5.62147	0.0240699	0.28452	0.0845981	0.932581	0.999081	8	4	6	4	6	3
FBti0059752	8.25229	0.0237867	0.283811	0.0838115	0.933206	0.999081	7	5	17	1	8	22
FBti0059755	8.25229	0.0237867	0.283811	0.0838115	0.933206	0.999081	7	5	17	1	8	22
FBti0020268	524.432	0.0134137	0.251328	0.0533711	0.957436	0.999136	746	822	352	134	680	931
FBti0020284	35.7255	-0.0110463	0.300482	-0.036762	0.970675	0.999136	37	66	27	16	46	36
FBti0020280	1104.98	-0.00457399	0.0911798	-0.0501645	0.959991	0.999136	1478	1365	1156	385	1332	1621
FBti0020234	8.35687	-0.0109787	0.310395	-0.0353703	0.971784	0.999136	10	7	12	4	7	12
FBti0019583	135.294	0.0158593	0.302911	0.0523563	0.958245	0.999136	139	109	222	72	98	177
FBti0019593	170.781	-0.012679	0.182231	-0.0695764	0.944531	0.999136	515	0	123	31	313	215
FBti0020007	45.9653	-0.0233158	0.311682	-0.0748062	0.940369	0.999136	107	42	23	9	66	80
FBti0020026	27.4266	0.0167103	0.268211	0.0623029	0.950322	0.999136	39	33	26	10	34	39
FBti0020038	259.738	0.0143341	0.225917	0.0634487	0.949409	0.999136	214	373	348	72	374	392
FBti0020155	24.3299	0.0207419	0.310846	0.0667272	0.946799	0.999136	40	15	31	6	52	21
FBti0020088	27.4266	0.0167103	0.268211	0.0623029	0.950322	0.999136	39	33	26	10	34	39
FBti0020085	32.5838	-0.0151049	0.27045	-0.0558511	0.95546	0.999136	40	39	42	0	87	37
FBti0020084	36.5902	-0.0194559	0.241037	-0.0807176	0.935667	0.999136	64	79	0	12	53	41
FBti0019666	5.47328	0.0108259	0.13943	0.077644	0.938111	0.999136	0	13	6	0	22	0
FBti0019103	33.4538	-0.0148406	0.275714	-0.053826	0.957074	0.999136	50	39	36	7	49	54
FBti0019168	8.18416	-0.0124126	0.194545	-0.0638033	0.949127	0.999136	23	9	0	0	17	14
FBti0019334	117.125	0.0101027	0.25558	0.0395285	0.968469	0.999136	141	168	121	22	196	184
FBti0020330	7.5077	0.00756803	0.196668	0.0384812	0.969304	0.999136	13	0	13	0	11	20
FBti0019372	101.695	0.0153256	0.2537	0.0604084	0.95183	0.999136	172	114	80	37	119	151
FBti0018924	7.02734	0.010877	0.304435	0.0357286	0.971499	0.999136	8	8	10	1	15	8
FBti0018984	61.0074	-0.0209899	0.304094	-0.0690244	0.94497	0.999136	89	66	63	35	40	72
FBti0019519	230.318	-0.00432312	0.114069	-0.037899	0.969768	0.999136	299	285	249	79	282	338
FBti0060182	5.59042	0.00419941	0.127534	0.0329278	0.973732	0.999136	17	0	2	6	0	0
FBti0060406	18.9534	0.0215367	0.302126	0.0712838	0.943172	0.999136	18	21	26	9	22	22
FBti0060427	43.5292	0.00860274	0.234208	0.0367311	0.970699	0.999136	50	63	46	13	63	60
FBti0060802	21.957	-0.0157041	0.27821	-0.0564468	0.954986	0.999136	26	26	27	8	28	29
FBti0060868	47.2236	0.0118679	0.227654	0.0521311	0.958424	0.999136	53	71	47	16	59	70
FBti0060964	47.9762	0.0191152	0.23935	0.0798631	0.936346	0.999136	68	64	43	14	67	71
FBti0061309	5.56167	0.0102653	0.302885	0.0338917	0.972964	0.999136	8	7	4	3	6	6
FBti0061736	9.00048	-0.017126	0.304465	-0.0562493	0.955143	0.999136	13	16	6	1	18	12
FBti0061784	7.65529	0.011031	0.310929	0.0354774	0.971699	0.999136	12	8	8	2	8	15
FBti0061797	8.3773	-0.0207119	0.30473	-0.067968	0.945811	0.999136	13	7	11	2	17	7
FBti0061813	6.20999	-0.0137766	0.296552	-0.0464561	0.962947	0.999136	12	9	3	1	9	11
FBti0061821	5.74326	-0.0218889	0.308176	-0.0710271	0.943376	0.999136	9	6	6	2	7	8
FBti0061942	17.4898	0.0147255	0.312147	0.0471751	0.962374	0.999136	20	22	18	10	22	12
FBti0062016	49.4012	0.0173861	0.246481	0.0705372	0.943766	0.999136	21	104	52	0	150	48
FBti0062185	8.70897	0.0212475	0.312229	0.068051	0.945745	0.999136	11	10	9	4	10	11
FBti0062212	28.3458	-0.0206923	0.312254	-0.0662676	0.947165	0.999136	54	33	20	4	51	43
FBti0062230	114.253	0.00794308	0.185627	0.0427905	0.965869	0.999136	125	152	127	49	135	143
FBti0062368	41.0342	0.0159061	0.280092	0.0567889	0.954713	0.999136	35	63	47	18	54	44
FBti0062780	5.39044	-0.015191	0.232746	-0.0652683	0.94796	0.999136	9	5	5	4	6	0
FBti0062900	18.7533	0.0172383	0.293443	0.058745	0.953155	0.999136	24	26	18	6	20	33
FBti0063402	6.92698	0.0190067	0.290118	0.0655137	0.947765	0.999136	11	11	2	4	7	7
FBti0063757	11.4571	-0.0212193	0.31171	-0.0680736	0.945727	0.999136	16	18	10	2	18	18
FBti0063962	8.50815	0.0145686	0.305605	0.0476712	0.961978	0.999136	5	9	15	4	8	12
FBti0059666	163.67	-0.00731236	0.173323	-0.0421891	0.966348	0.999136	222	189	186	48	194	274
FBti0059678	67.4018	-0.0073027	0.196254	-0.0372105	0.970317	0.999136	86	82	76	23	77	105
FBti0020307	70.4164	-0.00620249	0.207118	-0.0299466	0.97611	0.999252	94	99	67	20	92	110
FBti0019513	10.365	0.00988483	0.309905	0.0318963	0.974555	0.999252	17	12	10	1	20	16
FBti0060042	5.33089	-0.00826977	0.277262	-0.0298266	0.976205	0.999252	10	8	3	0	10	10
FBti0061898	54.4782	0.00770817	0.240064	0.0321088	0.974385	0.999252	70	65	57	24	53	79
FBti0062036	29.192	-0.00853753	0.282031	-0.0302716	0.97585	0.999252	41	29	36	9	31	51
FBti0063265	5.71032	-0.00878316	0.29753	-0.0295203	0.97645	0.999252	9	10	3	1	10	8
FBti0063420	8.66848	0.00961106	0.307269	0.031279	0.975047	0.999252	16	7	8	3	7	17
FBti0018956	8.88168	0.00786148	0.306909	0.025615	0.979564	0.99963	12	9	12	1	19	11
FBti0059686	13.9846	-0.00787738	0.308062	-0.0255708	0.9796	0.99963	12	23	15	7	6	25
FBti0019099	11.7017	0.00389377	0.157189	0.0247713	0.980237	0.99964	0	4	35	1	0	47
FBti0061467	12.9571	0.0076737	0.31208	0.0245889	0.980383	0.99964	23	15	10	3	16	24
FBti0020190	208.247	-0.00350287	0.143091	-0.0244801	0.98047	0.999662	271	289	202	65	258	324
FBti0019633	934.355	-0.00175535	0.117487	-0.0149408	0.988079	0.999833	1054	1373	981	282	1209	1447
FBti0019636	16.9653	-0.00161695	0.309071	-0.00523164	0.995826	0.999833	23	18	20	6	13	33
FBti0020047	27.5143	-0.00365446	0.183086	-0.0199604	0.984075	0.999833	70	34	0	0	20	94
FBti0019739	75.7822	-0.00203391	0.209416	-0.0097123	0.992251	0.999833	86	96	96	20	96	127
FBti0019332	91.5063	0.000216651	0.168247	0.00128769	0.998973	0.999833	107	121	105	29	112	142
FBti0020381	10.8897	0.00224154	0.139553	0.0160623	0.987185	0.999833	0	42	0	0	25	19
FBti0020391	426.316	-0.00211602	0.142119	-0.0148891	0.988121	0.999833	457	542	527	169	484	585
FBti0018892	12.624	-0.00704861	0.312107	-0.0225839	0.981982	0.999833	17	11	16	6	10	19
FBti0018886	18.4433	0.00502829	0.306919	0.0163831	0.986929	0.999833	26	23	20	3	23	38
FBti0019967	44.307	-0.00593136	0.276974	-0.0214148	0.982915	0.999833	61	58	38	22	44	53
FBti0018916	12	0.00188137	0.126056	0.0149249	0.988092	0.999833	42	0	1	0	46	0
FBti0019974	10.8231	0.0028684	0.237688	0.0120679	0.990371	0.999833	10	31	0	4	16	12
FBti0020405	9.76625	0.00360508	0.312082	0.0115517	0.990783	0.999833	14	8	13	3	16	11
FBti0019501	19.576	-0.00283818	0.30058	-0.00944234	0.992466	0.999833	31	22	20	4	28	33
FBti0060217	136.588	-0.00317262	0.146859	-0.0216031	0.982765	0.999833	183	169	142	47	172	195
FBti0060472	81.3572	-8.59843e-05	0.179981	-0.000477741	0.999619	0.999833	88	113	93	28	102	117
FBti0060665	7.041	-0.0068244	0.308983	-0.0220866	0.982379	0.999833	5	11	9	3	9	8
FBti0060683	11.0521	-0.000799894	0.312058	-0.00256328	0.997955	0.999833	11	11	18	3	15	17
FBti0060689	10.3184	-0.0014569	0.312239	-0.00466597	0.996277	0.999833	10	16	11	4	16	10
FBti0061144	11.2936	-0.0014709	0.308948	-0.00476101	0.996201	0.999833	14	17	10	4	15	15
FBti0061311	17.4356	-0.00324951	0.296217	-0.01097	0.991247	0.999833	26	19	18	6	20	27
FBti0061425	7.5896	0.00202077	0.310513	0.00650786	0.994808	0.999833	11	9	7	3	12	7
FBti0061810	46.0697	0.000774089	0.254985	0.00303582	0.997578	0.999833	46	72	50	15	49	79
FBti0061812	9.02606	0.00132377	0.310607	0.00426189	0.9966	0.999833	15	10	7	4	7	15
FBti0062093	68.8441	0.00323324	0.214869	0.0150475	0.987994	0.999833	71	88	85	28	75	98
FBti0062158	71.9251	-0.00413071	0.310009	-0.0133245	0.989369	0.999833	156	72	36	21	101	105
FBti0062202	44.9645	0.00309012	0.2441	0.0126593	0.9899	0.999833	50	51	58	18	48	66
FBti0062551	7.01844	0.00636527	0.292341	0.0217734	0.982629	0.999833	11	10	6	0	12	15
FBti0062609	11.4124	0.00621552	0.310875	0.0199937	0.984048	0.999833	16	9	16	3	22	11
FBti0062633	24.2621	0.00438491	0.281746	0.0155633	0.987583	0.999833	27	31	27	11	24	34
FBti0062696	41.6904	0.000117755	0.273783	0.000430105	0.999657	0.999833	63	54	38	9	56	74
FBti0062986	7.85082	-0.0054614	0.294378	-0.0185524	0.985198	0.999833	10	9	11	0	12	18
FBti0063085	19.057	0.00150347	0.30454	0.00493685	0.996061	0.999833	11	49	11	7	30	19
FBti0063293	5.69671	0.00340746	0.285884	0.0119191	0.99049	0.999833	10	4	7	1	4	15
FBti0063940	5.92411	0.0018118	0.280585	0.00645722	0.994848	0.999833	10	9	4	0	8	15
FBti0059649	5.45754	0.0033155	0.287843	0.0115184	0.99081	0.999833	7	7	7	0	7	14
FBti0059706	14.1385	-0.00158594	0.312232	-0.00507935	0.995947	0.999833	15	21	14	7	8	24
FBti0019259	2.42952	-0.209442	0.232149	-0.902185	0.366959	NA	9	1	3	0	2	3
FBti0019877	0.137713	-0.0106171	0.0934144	-0.113656	0.909511	NA	1	0	0	0	0	0
FBti0019260	0	NA	NA	NA	NA	NA	0	0	0	0	0	0
FBti0019261	0.936067	-0.215914	0.201422	-1.07195	0.283742	NA	3	2	1	0	0	1
FBti0019878	0.15034	-0.0106171	0.0934144	-0.113656	0.909511	NA	0	0	1	0	0	0
FBti0019265	2.58589	0.129967	0.229374	0.566614	0.570976	NA	2	0	4	2	2	4
FBti0019262	1.3429	-0.062465	0.192962	-0.323716	0.746153	NA	3	0	3	0	1	3
FBti0019874	0.491435	0.0334189	0.0934144	0.357749	0.720531	NA	0	0	0	1	0	0
FBti0019868	0.260344	0.0173253	0.113338	0.152864	0.878506	NA	0	1	0	0	1	0
FBti0019866	4.35987	-0.0783799	0.100589	-0.779208	NA	NA	0	0	29	0	0	0
FBti0019647	1.21242	-0.128703	0.230942	-0.557297	0.577324	NA	2	2	2	0	2	1
FBti0019648	0	NA	NA	NA	NA	NA	0	0	0	0	0	0
FBti0019650	0	NA	NA	NA	NA	NA	0	0	0	0	0	0
FBti0019651	0	NA	NA	NA	NA	NA	0	0	0	0	0	0
FBti0019652	0.15034	-0.0106171	0.0934144	-0.113656	0.909511	NA	0	0	1	0	0	0
FBti0019653	0	NA	NA	NA	NA	NA	0	0	0	0	0	0
FBti0019649	1.8723	0.318667	0.227197	1.4026	0.160736	NA	0	1	1	2	2	3
FBti0020246	4.11683	0.0191972	0.161286	0.119026	0.905255	NA	1	1	11	0	0	19
FBti0020252	0	NA	NA	NA	NA	NA	0	0	0	0	0	0
FBti0020253	0	NA	NA	NA	NA	NA	0	0	0	0	0	0
FBti0020255	0.517065	0.112318	0.158449	0.708859	0.478412	NA	1	0	0	0	2	1
FBti0020258	0	NA	NA	NA	NA	NA	0	0	0	0	0	0
FBti0020261	1.13698	0.166098	0.207174	0.801734	0.422707	NA	1	1	0	1	2	1
FBti0020266	0	NA	NA	NA	NA	NA	0	0	0	0	0	0
FBti0020267	0.115626	0.0334189	0.0934144	0.357749	0.720531	NA	0	0	0	0	0	1
FBti0020269	3.77415	0.159207	0.253762	0.62739	0.530404	NA	7	2	1	2	2	10
FBti0020272	2.46882	0.0215637	0.135505	0.159135	0.873562	NA	0	0	7	1	0	8
FBti0020275	0	NA	NA	NA	NA	NA	0	0	0	0	0	0
FBti0020271	2.50198	-0.11407	0.272564	-0.418507	0.675577	NA	3	3	4	1	2	3
FBti0020263	0.791178	0.0737435	0.0969339	0.760761	0.4468	NA	0	0	0	0	6	0
FBti0020262	0	NA	NA	NA	NA	NA	0	0	0	0	0	0
FBti0020256	0.491435	0.0334189	0.0934144	0.357749	0.720531	NA	0	0	0	1	0	0
FBti0020254	0	NA	NA	NA	NA	NA	0	0	0	0	0	0
FBti0020249	0	NA	NA	NA	NA	NA	0	0	0	0	0	0
FBti0020276	2.25434	0.165812	0.232667	0.712658	0.476057	NA	2	3	0	2	2	3
FBti0020290	0.115626	0.0334189	0.0934144	0.357749	0.720531	NA	0	0	0	0	0	1
FBti0020292	1.47431	0.0739039	0.0970135	0.761789	0.446186	NA	0	0	0	3	0	0
FBti0020281	2.51329	0.130391	0.189949	0.686453	0.492428	NA	5	0	0	2	2	5
FBti0020238	0.137713	-0.0106171	0.0934144	-0.113656	0.909511	NA	1	0	0	0	0	0
FBti0020237	0	NA	NA	NA	NA	NA	0	0	0	0	0	0
FBti0020231	2.51728	-0.136752	0.24169	-0.565816	0.571519	NA	8	1	2	1	2	2
FBti0019685	0	NA	NA	NA	NA	NA	0	0	0	0	0	0
FBti0019697	0.38182	-0.0244874	0.151476	-0.161659	0.871574	NA	1	1	0	0	0	1
FBti0019700	0.733224	-0.0416612	0.107103	-0.388984	0.697288	NA	0	0	4	0	1	0
FBti0019711	1.12052	0.234236	0.194284	1.20564	0.227958	NA	0	0	1	1	1	3
FBti0019714	0	NA	NA	NA	NA	NA	0	0	0	0	0	0
FBti0019709	0.115626	0.0334189	0.0934144	0.357749	0.720531	NA	0	0	0	0	0	1
FBti0019708	1.38686	0.0972384	0.162453	0.598564	0.549464	NA	3	0	0	0	3	5
FBti0019706	0.751939	0.0868138	0.164614	0.527377	0.597932	NA	0	2	0	0	2	2
FBti0019702	1.08843	0.0594332	0.149061	0.398718	0.690101	NA	1	2	0	0	0	6
FBti0019701	0	NA	NA	NA	NA	NA	0	0	0	0	0	0
FBti0019690	0	NA	NA	NA	NA	NA	0	0	0	0	0	0
FBti0019683	1.84327	0.158862	0.150985	1.05217	0.292723	NA	1	0	0	3	0	2
FBti0019528	0.990186	-0.123856	0.157449	-0.786644	0.43149	NA	0	2	4	0	1	0
FBti0019532	1.99112	-0.124346	0.125803	-0.988419	0.322948	NA	9	0	5	0	0	0
FBti0019530	2.87801	-0.0324979	0.247793	-0.131149	0.895657	NA	6	2	2	2	3	1
FBti0019534	0	NA	NA	NA	NA	NA	0	0	0	0	0	0
FBti0019536	2.46741	0.0467382	0.25602	0.182557	0.855146	NA	5	2	2	0	4	6
FBti0019543	0	NA	NA	NA	NA	NA	0	0	0	0	0	0
FBti0019542	2.61869	-0.124429	0.125519	-0.991315	0.321532	NA	0	4	14	0	0	0
FBti0019544	3.59328	-0.110325	0.203175	-0.543007	0.587125	NA	4	10	4	0	0	10
FBti0019547	3.85442	-0.0780538	0.100433	-0.777171	NA	NA	0	30	0	0	0	0
FBti0019546	2.45573	0.109192	0.252531	0.432392	0.665456	NA	1	4	3	0	5	6
FBti0019549	0	NA	NA	NA	NA	NA	0	0	0	0	0	0
FBti0019556	4.1543	-0.0970299	0.149904	-0.647279	0.517451	NA	16	8	0	0	7	0
FBti0019555	4.37748	0.107769	0.2062	0.522643	0.601222	NA	7	5	0	0	14	8
FBti0019557	0	NA	NA	NA	NA	NA	0	0	0	0	0	0
FBti0019558	0.963992	-0.0640312	0.0975069	-0.656683	0.511385	NA	7	0	0	0	0	0
FBti0019560	0	NA	NA	NA	NA	NA	0	0	0	0	0	0
FBti0019562	3.81431	0.398257	0.263516	1.51132	0.130707	NA	4	0	2	2	8	8
FBti0019565	0	NA	NA	NA	NA	NA	0	0	0	0	0	0
FBti0019564	0	NA	NA	NA	NA	NA	0	0	0	0	0	0
FBti0019569	0	NA	NA	NA	NA	NA	0	0	0	0	0	0
FBti0019571	0	NA	NA	NA	NA	NA	0	0	0	0	0	0
FBti0019573	0	NA	NA	NA	NA	NA	0	0	0	0	0	0
FBti0019572	0.253339	0.0166347	0.113184	0.14697	0.883155	NA	1	0	0	0	0	1
FBti0019578	0	NA	NA	NA	NA	NA	0	0	0	0	0	0
FBti0019580	0	NA	NA	NA	NA	NA	0	0	0	0	0	0
FBti0019584	0	NA	NA	NA	NA	NA	0	0	0	0	0	0
FBti0019585	0	NA	NA	NA	NA	NA	0	0	0	0	0	0
FBti0019586	0	NA	NA	NA	NA	NA	0	0	0	0	0	0
FBti0019589	0	NA	NA	NA	NA	NA	0	0	0	0	0	0
FBti0019594	0.67441	0.0482471	0.148765	0.324318	0.745697	NA	0	1	1	0	3	0
FBti0019592	0	NA	NA	NA	NA	NA	0	0	0	0	0	0
FBti0019599	0.910357	-0.0219468	0.148135	-0.148154	0.882221	NA	3	0	1	0	0	3
FBti0019600	0.388824	-0.00841223	0.112078	-0.0750571	0.940169	NA	0	2	0	0	1	0
FBti0019604	1.95442	-0.0753968	0.0991362	-0.760537	NA	NA	0	0	13	0	0	0
FBti0019605	0.37597	0.080528	0.15222	0.529024	0.596789	NA	0	1	0	0	1	1
FBti0019606	0	NA	NA	NA	NA	NA	0	0	0	0	0	0
FBti0019608	0.513923	-0.0499149	0.0956067	-0.522086	0.601611	NA	0	4	0	0	0	0
FBti0019609	0	NA	NA	NA	NA	NA	0	0	0	0	0	0
FBti0019617	2.61626	0.0260713	0.102712	0.253828	0.799628	NA	0	0	6	0	13	0
FBti0019618	1.80511	0.187477	0.160616	1.16724	0.243114	NA	0	1	0	2	0	6
FBti0019280	7.0021	-0.0412193	0.103759	-0.397261	NA	NA	0	41	0	0	0	15
FBti0019028	0	NA	NA	NA	NA	NA	0	0	0	0	0	0
FBti0019029	4.34721	0.0197717	0.194154	0.101835	0.918888	NA	12	0	3	0	10	8
FBti0018995	3.0972	0.00253756	0.101903	0.0249016	0.980133	NA	11	0	0	0	12	0
FBti0018879	0	NA	NA	NA	NA	NA	0	0	0	0	0	0
FBti0018996	0	NA	NA	NA	NA	NA	0	0	0	0	0	0
FBti0018994	0.826279	-0.0605865	0.0971103	-0.623894	0.532697	NA	6	0	0	0	0	0
FBti0018997	0	NA	NA	NA	NA	NA	0	0	0	0	0	0
FBti0018962	0.231252	0.0546833	0.0934484	0.585171	0.558433	NA	0	0	0	0	0	2
FBti0018918	2.37342	0.0336103	0.20839	0.161285	0.871869	NA	4	0	4	0	4	6
FBti0019998	1.86874	-0.248851	0.202032	-1.23174	0.218046	NA	8	3	1	0	0	2
FBti0020003	0	NA	NA	NA	NA	NA	0	0	0	0	0	0
FBti0020008	15.1642	0.0806536	0.101494	0.794667	NA	NA	0	0	0	0	115	0
FBti0020009	0	NA	NA	NA	NA	NA	0	0	0	0	0	0
FBti0020010	0	NA	NA	NA	NA	NA	0	0	0	0	0	0
FBti0020015	12.9624	0.03076	0.103353	0.297619	NA	NA	0	0	27	0	0	77
FBti0020013	2.59051	0.182767	0.146617	1.24657	0.212557	NA	0	0	0	0	10	11
FBti0020012	0	NA	NA	NA	NA	NA	0	0	0	0	0	0
FBti0020016	4.45093	-0.0035025	0.101525	-0.0344989	0.972479	NA	17	0	0	0	16	0
FBti0020017	2.55607	0.164716	0.14005	1.17612	0.239546	NA	0	0	0	0	15	5
FBti0020019	0	NA	NA	NA	NA	NA	0	0	0	0	0	0
FBti0020020	0	NA	NA	NA	NA	NA	0	0	0	0	0	0
FBti0020023	3.19551	-0.139974	0.132368	-1.05746	0.2903	NA	0	12	11	0	0	0
FBti0020027	0.131863	0.0334189	0.0934144	0.357749	0.720531	NA	0	0	0	0	1	0
FBti0020028	0	NA	NA	NA	NA	NA	0	0	0	0	0	0
FBti0020029	0	NA	NA	NA	NA	NA	0	0	0	0	0	0
FBti0020030	0	NA	NA	NA	NA	NA	0	0	0	0	0	0
FBti0020032	0	NA	NA	NA	NA	NA	0	0	0	0	0	0
FBti0020037	0	NA	NA	NA	NA	NA	0	0	0	0	0	0
FBti0019627	0	NA	NA	NA	NA	NA	0	0	0	0	0	0
FBti0019629	1.07332	-0.0471431	0.152146	-0.309855	0.756671	NA	2	0	3	0	0	3
FBti0019626	12.803	-0.133645	0.137807	-0.969798	NA	NA	86	0	1	0	0	7
FBti0019630	0	NA	NA	NA	NA	NA	0	0	0	0	0	0
FBti0019635	1.84381	-0.148299	0.230125	-0.644427	0.519298	NA	3	2	3	1	0	2
FBti0019045	0	NA	NA	NA	NA	NA	0	0	0	0	0	0
FBti0019046	0	NA	NA	NA	NA	NA	0	0	0	0	0	0
FBti0019050	5.14659	0.203377	0.154156	1.3193	0.187069	NA	0	0	0	0	25	16
FBti0019056	0	NA	NA	NA	NA	NA	0	0	0	0	0	0
FBti0019060	0	NA	NA	NA	NA	NA	0	0	0	0	0	0
FBti0019062	0.131863	0.0334189	0.0934144	0.357749	0.720531	NA	0	0	0	0	1	0
FBti0019063	0	NA	NA	NA	NA	NA	0	0	0	0	0	0
FBti0019064	0	NA	NA	NA	NA	NA	0	0	0	0	0	0
FBti0019066	0.413139	-0.0446096	0.0946921	-0.471101	0.637568	NA	3	0	0	0	0	0
FBti0019065	0	NA	NA	NA	NA	NA	0	0	0	0	0	0
FBti0019638	0	NA	NA	NA	NA	NA	0	0	0	0	0	0
FBti0019068	2.45718	0.0781177	0.0995115	0.785012	0.432447	NA	0	0	0	5	0	0
FBti0019070	0	NA	NA	NA	NA	NA	0	0	0	0	0	0
FBti0019072	4.85028	0.0138528	0.196114	0.0706364	0.943687	NA	13	0	4	0	9	11
FBti0019071	0	NA	NA	NA	NA	NA	0	0	0	0	0	0
FBti0019075	0	NA	NA	NA	NA	NA	0	0	0	0	0	0
FBti0019074	0.115626	0.0334189	0.0934144	0.357749	0.720531	NA	0	0	0	0	0	1
FBti0019076	0.346877	0.0668681	0.0940088	0.711297	0.4769	NA	0	0	0	0	0	3
FBti0019639	0	NA	NA	NA	NA	NA	0	0	0	0	0	0
FBti0019078	0.798581	-0.0948046	0.120679	-0.785593	0.432106	NA	3	3	0	0	0	0
FBti0019079	1.43869	0.208222	0.18826	1.10604	0.26871	NA	1	1	0	0	1	9
FBti0019083	1.04063	0.0752174	0.0976611	0.770188	0.441188	NA	0	0	0	0	0	9
FBti0019085	0	NA	NA	NA	NA	NA	0	0	0	0	0	0
FBti0019644	0	NA	NA	NA	NA	NA	0	0	0	0	0	0
FBti0019090	0.244107	0.0165749	0.112988	0.146697	0.883372	NA	0	1	0	0	0	1
FBti0019087	0	NA	NA	NA	NA	NA	0	0	0	0	0	0
FBti0020169	1.29019	-0.166467	0.187884	-0.886009	0.375613	NA	1	6	1	0	0	2
FBti0020173	0.790036	0.113891	0.187937	0.606006	0.544511	NA	0	1	1	0	3	1
FBti0020168	4.35903	0.0273734	0.276789	0.0988966	0.92122	NA	8	7	1	1	6	8
FBti0020161	3.84402	-0.0642124	0.290088	-0.221355	0.824816	NA	5	5	5	1	7	3
FBti0020160	154.88	-0.269855	0.199825	-1.35045	NA	NA	223	555	227	7	116	0
FBti0020159	0	NA	NA	NA	NA	NA	0	0	0	0	0	0
FBti0020156	0	NA	NA	NA	NA	NA	0	0	0	0	0	0
FBti0020157	0	NA	NA	NA	NA	NA	0	0	0	0	0	0
FBti0020147	0.15034	-0.0106171	0.0934144	-0.113656	0.909511	NA	0	0	1	0	0	0
FBti0020148	0	NA	NA	NA	NA	NA	0	0	0	0	0	0
FBti0020151	0.263726	0.0558598	0.0934703	0.597621	0.550093	NA	0	0	0	0	2	0
FBti0020146	0.275426	-0.03254	0.0934272	-0.348292	0.727621	NA	2	0	0	0	0	0
FBti0020138	0	NA	NA	NA	NA	NA	0	0	0	0	0	0
FBti0020140	0	NA	NA	NA	NA	NA	0	0	0	0	0	0
FBti0020143	0	NA	NA	NA	NA	NA	0	0	0	0	0	0
FBti0020142	0.128481	-0.0106171	0.0934144	-0.113656	0.909511	NA	0	1	0	0	0	0
FBti0020141	0.395589	0.0687931	0.0944153	0.728622	0.466233	NA	0	0	0	0	3	0
FBti0020139	3.9071	0.0121385	0.281331	0.0431465	0.965585	NA	3	4	7	1	3	9
FBti0020134	3.24883	-0.0262287	0.176364	-0.148719	0.881775	NA	0	3	9	2	4	0
FBti0020133	0	NA	NA	NA	NA	NA	0	0	0	0	0	0
FBti0020132	0	NA	NA	NA	NA	NA	0	0	0	0	0	0
FBti0020130	0	NA	NA	NA	NA	NA	0	0	0	0	0	0
FBti0020131	39.2539	-0.00987032	0.101722	-0.097032	NA	NA	0	9	139	35	0	0
FBti0020126	0	NA	NA	NA	NA	NA	0	0	0	0	0	0
FBti0020128	0	NA	NA	NA	NA	NA	0	0	0	0	0	0
FBti0020123	2.81007	0.0262493	0.102842	0.255239	0.798538	NA	7	0	0	0	14	0
FBti0020124	2.08613	0.0123167	0.103268	0.119269	0.905062	NA	0	7	0	0	9	0
FBti0020122	0	NA	NA	NA	NA	NA	0	0	0	0	0	0
FBti0020120	1.05238	-0.065836	0.0976988	-0.673867	0.500396	NA	0	0	7	0	0	0
FBti0020115	0.256961	-0.03254	0.0934272	-0.348292	0.727621	NA	0	2	0	0	0	0
FBti0020113	0	NA	NA	NA	NA	NA	0	0	0	0	0	0
FBti0020110	0.791178	0.0737435	0.0969339	0.760761	0.4468	NA	0	0	0	0	6	0
FBti0020108	0	NA	NA	NA	NA	NA	0	0	0	0	0	0
FBti0020105	28.8381	0.0943454	0.112592	0.837939	NA	NA	6	0	0	57	0	0
FBti0020100	4.76174	-0.112309	0.152953	-0.734271	0.462784	NA	12	17	0	0	0	8
FBti0020101	0	NA	NA	NA	NA	NA	0	0	0	0	0	0
FBti0020098	0	NA	NA	NA	NA	NA	0	0	0	0	0	0
FBti0020097	2.42814	0.0783355	0.09968	0.78587	NA	NA	0	0	0	0	0	21
FBti0020090	0	NA	NA	NA	NA	NA	0	0	0	0	0	0
FBti0020080	0	NA	NA	NA	NA	NA	0	0	0	0	0	0
FBti0020083	0	NA	NA	NA	NA	NA	0	0	0	0	0	0
FBti0020079	0	NA	NA	NA	NA	NA	0	0	0	0	0	0
FBti0020075	0	NA	NA	NA	NA	NA	0	0	0	0	0	0
FBti0020074	1.80511	0.187477	0.160616	1.16724	0.243114	NA	0	1	0	2	0	6
FBti0020071	1.92798	-0.0753462	0.099111	-0.76022	NA	NA	14	0	0	0	0	0
FBti0020069	0.826279	-0.0605865	0.0971103	-0.623894	0.532697	NA	6	0	0	0	0	0
FBti0020062	0.527452	0.0710919	0.0955997	0.743642	0.457093	NA	0	0	0	0	4	0
FBti0020066	1.11135	0.0457281	0.102895	0.444414	0.656744	NA	0	1	0	2	0	0
FBti0020058	1.55082	0.223413	0.202542	1.10304	0.270008	NA	0	0	2	1	4	2
FBti0020057	0	NA	NA	NA	NA	NA	0	0	0	0	0	0
FBti0020053	0	NA	NA	NA	NA	NA	0	0	0	0	0	0
FBti0020043	0	NA	NA	NA	NA	NA	0	0	0	0	0	0
FBti0020045	0.826279	-0.0605865	0.0971103	-0.623894	0.532697	NA	6	0	0	0	0	0
FBti0020044	0	NA	NA	NA	NA	NA	0	0	0	0	0	0
FBti0020042	0.385442	-0.0432016	0.0944297	-0.4575	0.647312	NA	0	3	0	0	0	0
FBti0020040	14.813	0.0778438	0.109667	0.709821	NA	NA	0	10	0	0	0	117
FBti0019679	2.91604	0.0195639	0.137055	0.142745	0.886492	NA	9	0	0	2	0	6
FBti0019662	0	NA	NA	NA	NA	NA	0	0	0	0	0	0
FBti0019663	0	NA	NA	NA	NA	NA	0	0	0	0	0	0
FBti0019664	0	NA	NA	NA	NA	NA	0	0	0	0	0	0
FBti0019667	1.22774	-0.310667	0.19629	-1.58269	0.113491	NA	3	4	2	0	0	0
FBti0019668	0	NA	NA	NA	NA	NA	0	0	0	0	0	0
FBti0019671	0	NA	NA	NA	NA	NA	0	0	0	0	0	0
FBti0019675	1.75927	-0.102794	0.179388	-0.573023	0.566629	NA	4	0	4	1	0	1
FBti0019673	0.548397	-0.0877133	0.182448	-0.480758	0.630689	NA	1	1	1	0	1	0
FBti0019672	0.288053	-0.0476325	0.112314	-0.424102	0.671491	NA	1	0	1	0	0	0
FBti0019670	0.548397	-0.0877133	0.182448	-0.480758	0.630689	NA	1	1	1	0	1	0
FBti0019669	0.288053	-0.0476325	0.112314	-0.424102	0.671491	NA	1	0	1	0	0	0
FBti0019665	0	NA	NA	NA	NA	NA	0	0	0	0	0	0
FBti0019661	1.43088	-0.0425146	0.22306	-0.190597	0.848841	NA	3	1	1	1	1	1
FBti0019659	1.80511	0.187477	0.160616	1.16724	0.243114	NA	0	1	0	2	0	6
FBti0019654	1.80511	0.187477	0.160616	1.16724	0.243114	NA	0	1	0	2	0	6
FBti0019655	0	NA	NA	NA	NA	NA	0	0	0	0	0	0
FBti0019657	2.31252	0.0782037	0.099578	0.785351	NA	NA	0	0	0	0	0	20
FBti0019744	0.952076	-0.142886	0.216947	-0.658622	0.510138	NA	2	1	2	0	1	1
FBti0019746	0.394675	-0.0656063	0.114513	-0.572915	0.566702	NA	1	2	0	0	0	0
FBti0019743	3.6198	-0.153913	0.272701	-0.564401	0.572481	NA	6	7	2	2	2	3
FBti0019718	0.491435	0.0334189	0.0934144	0.357749	0.720531	NA	0	0	0	1	0	0
FBti0019721	0.269576	0.0173791	0.113508	0.153108	0.878313	NA	1	0	0	0	1	0
FBti0019726	0	NA	NA	NA	NA	NA	0	0	0	0	0	0
FBti0019729	0	NA	NA	NA	NA	NA	0	0	0	0	0	0
FBti0019731	0	NA	NA	NA	NA	NA	0	0	0	0	0	0
FBti0019732	3.18563	0.00438765	0.210848	0.0208095	0.983398	NA	8	2	1	2	0	6
FBti0019734	0	NA	NA	NA	NA	NA	0	0	0	0	0	0
FBti0019736	0	NA	NA	NA	NA	NA	0	0	0	0	0	0
FBti0019724	0.511215	0.114055	0.119527	0.954224	0.33997	NA	0	0	0	0	3	1
FBti0019723	0	NA	NA	NA	NA	NA	0	0	0	0	0	0
FBti0019119	0	NA	NA	NA	NA	NA	0	0	0	0	0	0
FBti0019116	0	NA	NA	NA	NA	NA	0	0	0	0	0	0
FBti0019749	1.58236	0.0769376	0.0986035	0.780273	0.43523	NA	0	0	0	0	12	0
FBti0019111	0	NA	NA	NA	NA	NA	0	0	0	0	0	0
FBti0019750	2.48753	-0.133073	0.129576	-1.02699	0.304425	NA	0	10	8	0	0	0
FBti0019106	0.346877	0.0668681	0.0940088	0.711297	0.4769	NA	0	0	0	0	0	3
FBti0019108	3.21279	-0.141258	0.13292	-1.06273	0.287905	NA	14	10	0	0	0	0
FBti0019107	13.7713	-0.0802184	0.10145	-0.790716	NA	NA	100	0	0	0	0	0
FBti0019105	0	NA	NA	NA	NA	NA	0	0	0	0	0	0
FBti0019095	0.128481	-0.0106171	0.0934144	-0.113656	0.909511	NA	0	1	0	0	0	0
FBti0020176	0.858092	0.146967	0.13322	1.10319	0.269944	NA	0	0	0	0	3	4
FBti0020179	0.429161	-0.0662213	0.113479	-0.583554	0.55952	NA	0	1	2	0	0	0
FBti0020183	0.115626	0.0334189	0.0934144	0.357749	0.720531	NA	0	0	0	0	0	1
FBti0020186	0	NA	NA	NA	NA	NA	0	0	0	0	0	0
FBti0020187	1.41329	-0.0725057	0.0983201	-0.737445	0.460852	NA	0	11	0	0	0	0
FBti0020191	0	NA	NA	NA	NA	NA	0	0	0	0	0	0
FBti0020196	0	NA	NA	NA	NA	NA	0	0	0	0	0	0
FBti0020197	0	NA	NA	NA	NA	NA	0	0	0	0	0	0
FBti0020195	0	NA	NA	NA	NA	NA	0	0	0	0	0	0
FBti0020200	0.69196	-0.175806	0.163383	-1.07603	0.281912	NA	3	1	1	0	0	0
FBti0020204	3.1219	0.0789293	0.100141	0.788184	NA	NA	0	0	0	0	0	27
FBti0020206	0.269576	0.0173791	0.113508	0.153108	0.878313	NA	1	0	0	0	1	0
FBti0020215	0.940376	0.0542174	0.187588	0.289024	0.772563	NA	0	1	2	0	3	1
FBti0020218	2.27681	-0.00769508	0.145525	-0.052878	0.957829	NA	0	6	3	0	8	0
FBti0020219	4.33047	-0.0107788	0.291914	-0.0369246	0.970545	NA	5	3	7	2	4	6
FBti0020217	0.115626	0.0334189	0.0934144	0.357749	0.720531	NA	0	0	0	0	0	1
FBti0020214	1.99632	0.171477	0.225061	0.761914	0.446111	NA	3	1	1	0	2	9
FBti0020213	2.78551	0.0159993	0.249977	0.0640032	0.948968	NA	5	4	1	1	1	7
FBti0019312	0	NA	NA	NA	NA	NA	0	0	0	0	0	0
FBti0019313	0	NA	NA	NA	NA	NA	0	0	0	0	0	0
FBti0019314	2.75426	-0.0769301	0.0998915	-0.770136	NA	NA	20	0	0	0	0	0
FBti0019315	0	NA	NA	NA	NA	NA	0	0	0	0	0	0
FBti0019316	0	NA	NA	NA	NA	NA	0	0	0	0	0	0
FBti0019317	0	NA	NA	NA	NA	NA	0	0	0	0	0	0
FBti0019306	0	NA	NA	NA	NA	NA	0	0	0	0	0	0
FBti0019310	2.85248	-0.0546841	0.273959	-0.199607	0.841788	NA	2	5	4	1	2	5
FBti0019311	0	NA	NA	NA	NA	NA	0	0	0	0	0	0
FBti0019309	0	NA	NA	NA	NA	NA	0	0	0	0	0	0
FBti0019308	0	NA	NA	NA	NA	NA	0	0	0	0	0	0
FBti0020305	1.75407	-0.023222	0.146687	-0.158311	0.874212	NA	0	8	0	0	2	4
FBti0019297	0.137713	-0.0106171	0.0934144	-0.113656	0.909511	NA	1	0	0	0	0	0
FBti0019295	3.88339	0.0185426	0.280446	0.0661182	0.947284	NA	4	7	4	0	6	9
FBti0020303	0	NA	NA	NA	NA	NA	0	0	0	0	0	0
FBti0020296	0.501068	-0.0284703	0.109429	-0.260171	0.794732	NA	0	3	0	0	0	1
FBti0019289	0.253339	0.0166347	0.113184	0.14697	0.883155	NA	1	0	0	0	0	1
FBti0019290	1.16485	0.0695808	0.226398	0.307338	0.758586	NA	2	1	1	0	2	3
FBti0019291	0.491435	0.0334189	0.0934144	0.357749	0.720531	NA	0	0	0	1	0	0
FBti0020302	0.263726	0.0558598	0.0934703	0.597621	0.550093	NA	0	0	0	0	2	0
FBti0019288	0	NA	NA	NA	NA	NA	0	0	0	0	0	0
FBti0020297	3.09826	0.0360795	0.134373	0.268503	0.788312	NA	0	9	0	1	11	0
FBti0019123	0	NA	NA	NA	NA	NA	0	0	0	0	0	0
FBti0019124	1.43782	0.0682389	0.238333	0.286317	0.774635	NA	1	2	2	0	3	3
FBti0019125	0	NA	NA	NA	NA	NA	0	0	0	0	0	0
FBti0019127	0.128481	-0.0106171	0.0934144	-0.113656	0.909511	NA	0	1	0	0	0	0
FBti0019130	10.4069	-0.0799347	0.101319	-0.78894	NA	NA	0	81	0	0	0	0
FBti0019133	0	NA	NA	NA	NA	NA	0	0	0	0	0	0
FBti0019134	1.04063	0.0752174	0.0976611	0.770188	0.441188	NA	0	0	0	0	0	9
FBti0019135	0	NA	NA	NA	NA	NA	0	0	0	0	0	0
FBti0019138	3.03531	0.131274	0.126589	1.03701	0.299732	NA	0	0	0	5	0	5
FBti0019755	0	NA	NA	NA	NA	NA	0	0	0	0	0	0
FBti0019140	0	NA	NA	NA	NA	NA	0	0	0	0	0	0
FBti0019142	0	NA	NA	NA	NA	NA	0	0	0	0	0	0
FBti0019146	49.2954	-0.080408	0.101747	-0.790271	NA	NA	357	0	0	0	1	0
FBti0019758	5.71293	-0.0790006	0.100883	-0.783093	NA	NA	0	0	38	0	0	0
FBti0019156	3.9829	-0.0781465	0.100478	-0.777751	NA	NA	0	31	0	0	0	0
FBti0019158	0	NA	NA	NA	NA	NA	0	0	0	0	0	0
FBti0019161	1.80511	0.187477	0.160616	1.16724	0.243114	NA	0	1	0	2	0	6
FBti0019160	1.37713	-0.0718652	0.0982661	-0.731333	0.464576	NA	10	0	0	0	0	0
FBti0019155	0	NA	NA	NA	NA	NA	0	0	0	0	0	0
FBti0019162	1.80511	0.187477	0.160616	1.16724	0.243114	NA	0	1	0	2	0	6
FBti0019164	3.356	-0.140967	0.242287	-0.581818	0.56069	NA	1	8	7	0	6	3
FBti0019163	69.0254	-0.474622	0.217933	-2.17784	NA	NA	13	26	425	0	0	0
FBti0019170	0	NA	NA	NA	NA	NA	0	0	0	0	0	0
FBti0019171	0	NA	NA	NA	NA	NA	0	0	0	0	0	0
FBti0019169	0	NA	NA	NA	NA	NA	0	0	0	0	0	0
FBti0019173	3.19456	-0.653149	0.251718	-2.59477	0.00946552	NA	7	8	8	0	0	0
FBti0019760	0	NA	NA	NA	NA	NA	0	0	0	0	0	0
FBti0019175	4.33702	0.25552	0.204264	1.25093	0.210961	NA	0	5	0	5	5	5
FBti0019174	2.30446	0.0156908	0.249093	0.0629915	0.949773	NA	4	4	1	0	3	6
FBti0019177	0	NA	NA	NA	NA	NA	0	0	0	0	0	0
FBti0019176	531.953	0.609872	0.265329	2.29855	NA	NA	319	99	12	220	862	2177
FBti0019768	1.80511	0.187477	0.160616	1.16724	0.243114	NA	0	1	0	2	0	6
FBti0019766	1.80511	0.187477	0.160616	1.16724	0.243114	NA	0	1	0	2	0	6
FBti0019763	1.80511	0.187477	0.160616	1.16724	0.243114	NA	0	1	0	2	0	6
FBti0019182	1.80511	0.187477	0.160616	1.16724	0.243114	NA	0	1	0	2	0	6
FBti0019181	1.80511	0.187477	0.160616	1.16724	0.243114	NA	0	1	0	2	0	6
FBti0019770	3.5844	0.079202	0.100353	0.789233	NA	NA	0	0	0	0	0	31
FBti0019188	0	NA	NA	NA	NA	NA	0	0	0	0	0	0
FBti0019771	0	NA	NA	NA	NA	NA	0	0	0	0	0	0
FBti0019189	1.80511	0.187477	0.160616	1.16724	0.243114	NA	0	1	0	2	0	6
FBti0019192	1.80511	0.187477	0.160616	1.16724	0.243114	NA	0	1	0	2	0	6
FBti0019197	0.394447	-0.0265438	0.150699	-0.176138	0.860186	NA	0	1	1	0	0	1
FBti0019195	1.80511	0.187477	0.160616	1.16724	0.243114	NA	0	1	0	2	0	6
FBti0019199	2.47884	-0.0765087	0.0996858	-0.767498	NA	NA	18	0	0	0	0	0
FBti0019773	4.40682	-0.0783653	0.100604	-0.778945	NA	NA	32	0	0	0	0	0
FBti0019202	1.54445	-0.120131	0.124216	-0.967115	0.333487	NA	0	5	6	0	0	0
FBti0019204	0	NA	NA	NA	NA	NA	0	0	0	0	0	0
FBti0019778	0	NA	NA	NA	NA	NA	0	0	0	0	0	0
FBti0019781	2.73028	0.090819	0.202278	0.448981	0.653446	NA	4	4	0	0	10	3
FBti0019206	0	NA	NA	NA	NA	NA	0	0	0	0	0	0
FBti0019786	1.94227	0.0579039	0.245352	0.236004	0.81343	NA	1	4	2	0	4	4
FBti0019788	0	NA	NA	NA	NA	NA	0	0	0	0	0	0
FBti0019792	0	NA	NA	NA	NA	NA	0	0	0	0	0	0
FBti0019793	0	NA	NA	NA	NA	NA	0	0	0	0	0	0
FBti0019791	2.10981	0.0779267	0.099364	0.784255	NA	NA	0	0	0	0	16	0
FBti0019787	0.128481	-0.0106171	0.0934144	-0.113656	0.909511	NA	0	1	0	0	0	0
FBti0019785	2.47152	-0.2341	0.240123	-0.974917	0.329601	NA	2	10	2	0	2	3
FBti0019784	1.80347	-0.0771198	0.243818	-0.3163	0.751774	NA	3	3	1	1	1	2
FBti0019782	1.15763	0.0118854	0.145357	0.0817671	0.934832	NA	0	1	3	0	0	5
FBti0019806	0.253339	0.0166347	0.113184	0.14697	0.883155	NA	1	0	0	0	0	1
FBti0019807	0	NA	NA	NA	NA	NA	0	0	0	0	0	0
FBti0019818	1.65256	-0.0745118	0.0986917	-0.754995	0.450252	NA	12	0	0	0	0	0
FBti0019208	0.131863	0.0334189	0.0934144	0.357749	0.720531	NA	0	0	0	0	1	0
FBti0019822	0	NA	NA	NA	NA	NA	0	0	0	0	0	0
FBti0019211	0	NA	NA	NA	NA	NA	0	0	0	0	0	0
FBti0019805	4.37087	0.486212	0.291074	1.67041	0.0948392	NA	2	3	3	2	12	6
FBti0019795	0	NA	NA	NA	NA	NA	0	0	0	0	0	0
FBti0019824	4.05927	-0.0649651	0.298321	-0.217769	0.827609	NA	6	6	4	1	6	5
FBti0019215	0.115626	0.0334189	0.0934144	0.357749	0.720531	NA	0	0	0	0	0	1
FBti0019213	0	NA	NA	NA	NA	NA	0	0	0	0	0	0
FBti0019219	0	NA	NA	NA	NA	NA	0	0	0	0	0	0
FBti0019828	1.4405	-0.0789788	0.19659	-0.401744	0.687872	NA	5	2	0	0	2	2
FBti0019827	0	NA	NA	NA	NA	NA	0	0	0	0	0	0
FBti0019826	0.833068	-0.236986	0.18193	-1.30262	0.192704	NA	2	2	2	0	0	0
FBti0019225	0.137713	-0.0106171	0.0934144	-0.113656	0.909511	NA	1	0	0	0	0	0
FBti0019831	0	NA	NA	NA	NA	NA	0	0	0	0	0	0
FBti0019228	0	NA	NA	NA	NA	NA	0	0	0	0	0	0
FBti0019836	0	NA	NA	NA	NA	NA	0	0	0	0	0	0
FBti0019834	1.93951	-0.00102746	0.147267	-0.00697689	0.994433	NA	3	0	4	0	0	8
FBti0019832	0	NA	NA	NA	NA	NA	0	0	0	0	0	0
FBti0019227	0.15034	-0.0106171	0.0934144	-0.113656	0.909511	NA	0	0	1	0	0	0
FBti0019226	0.644391	-0.0112765	0.108117	-0.104299	0.916932	NA	3	0	0	0	0	2
FBti0019223	0	NA	NA	NA	NA	NA	0	0	0	0	0	0
FBti0020314	0	NA	NA	NA	NA	NA	0	0	0	0	0	0
FBti0019326	0	NA	NA	NA	NA	NA	0	0	0	0	0	0
FBti0020316	0	NA	NA	NA	NA	NA	0	0	0	0	0	0
FBti0020317	4.48233	0.0612467	0.102775	0.595932	0.55122	NA	4	0	0	8	0	0
FBti0019327	0	NA	NA	NA	NA	NA	0	0	0	0	0	0
FBti0019324	0.89773	-0.0110585	0.106058	-0.104268	0.916956	NA	4	0	0	0	0	3
FBti0020313	3.18584	-0.0339231	0.264413	-0.128296	0.897915	NA	7	2	3	1	6	2
FBti0019323	0	NA	NA	NA	NA	NA	0	0	0	0	0	0
FBti0020312	0.638541	0.0491512	0.155545	0.315993	0.752008	NA	2	0	0	0	1	2
FBti0019320	4.63411	-0.148428	0.135633	-1.09433	0.273809	NA	14	0	18	0	0	0
FBti0020311	0.115626	0.0334189	0.0934144	0.357749	0.720531	NA	0	0	0	0	0	1
FBti0019321	1.58236	0.0769376	0.0986035	0.780273	0.43523	NA	0	0	0	0	12	0
FBti0019318	0	NA	NA	NA	NA	NA	0	0	0	0	0	0
FBti0019319	0	NA	NA	NA	NA	NA	0	0	0	0	0	0
FBti0020322	0.982871	0.0558598	0.0934703	0.597621	0.550093	NA	0	0	0	2	0	0
FBti0019329	1.72973	-0.169293	0.237321	-0.713352	0.475628	NA	2	5	2	0	3	1
FBti0019331	1.08417	-0.138042	0.198144	-0.696675	0.486006	NA	3	2	1	0	2	0
FBti0019330	2.91008	-0.0263693	0.100002	-0.263689	0.79202	NA	0	15	0	2	0	0
FBti0019339	7.86296	0.0802036	0.101138	0.793015	NA	NA	0	0	0	16	0	0
FBti0019340	18.6506	0.0414674	0.178291	0.232582	NA	NA	24	10	22	0	0	93
FBti0019345	2.47597	0.267956	0.217692	1.2309	0.218361	NA	0	2	1	3	1	4
FBti0019346	0	NA	NA	NA	NA	NA	0	0	0	0	0	0
FBti0019353	0	NA	NA	NA	NA	NA	0	0	0	0	0	0
FBti0020329	1.09657	-0.0773855	0.214277	-0.361147	0.71799	NA	1	1	3	0	2	1
FBti0019359	1.10104	0.111171	0.156993	0.708126	0.478867	NA	2	0	0	0	1	6
FBti0019360	1.96574	0.0773388	0.0989113	0.7819	0.434273	NA	0	0	0	4	0	0
FBti0019362	0.601361	-0.053138	0.0961067	-0.552906	0.580328	NA	0	0	4	0	0	0
FBti0020376	0	NA	NA	NA	NA	NA	0	0	0	0	0	0
FBti0020371	0.263726	0.0558598	0.0934703	0.597621	0.550093	NA	0	0	0	0	2	0
FBti0020368	0.385442	-0.0432016	0.0944297	-0.4575	0.647312	NA	0	3	0	0	0	0
FBti0020365	0	NA	NA	NA	NA	NA	0	0	0	0	0	0
FBti0020362	0.128481	-0.0106171	0.0934144	-0.113656	0.909511	NA	0	1	0	0	0	0
FBti0020358	0.263726	0.0558598	0.0934703	0.597621	0.550093	NA	0	0	0	0	2	0
FBti0020355	0.385442	-0.0432016	0.0944297	-0.4575	0.647312	NA	0	3	0	0	0	0
FBti0020352	0	NA	NA	NA	NA	NA	0	0	0	0	0	0
FBti0020349	0	NA	NA	NA	NA	NA	0	0	0	0	0	0
FBti0020335	0.491435	0.0334189	0.0934144	0.357749	0.720531	NA	0	0	0	1	0	0
FBti0019361	0	NA	NA	NA	NA	NA	0	0	0	0	0	0
FBti0020332	0	NA	NA	NA	NA	NA	0	0	0	0	0	0
FBti0019363	4.26787	0.168417	0.273672	0.615398	0.538292	NA	6	1	4	3	5	5
FBti0019370	0	NA	NA	NA	NA	NA	0	0	0	0	0	0
FBti0019376	1.47974	0.00749108	0.104232	0.0718696	0.942706	NA	5	0	0	0	6	0
FBti0019378	0	NA	NA	NA	NA	NA	0	0	0	0	0	0
FBti0019379	0	NA	NA	NA	NA	NA	0	0	0	0	0	0
FBti0019382	3.00627	0.0788486	0.100078	0.787872	NA	NA	0	0	0	0	0	26
FBti0019377	0	NA	NA	NA	NA	NA	0	0	0	0	0	0
FBti0019388	4.9557	0.147319	0.187493	0.785728	0.432027	NA	1	9	0	0	19	10
FBti0019389	0	NA	NA	NA	NA	NA	0	0	0	0	0	0
FBti0019392	0	NA	NA	NA	NA	NA	0	0	0	0	0	0
FBti0019395	1.80511	0.187477	0.160616	1.16724	0.243114	NA	0	1	0	2	0	6
FBti0019394	0	NA	NA	NA	NA	NA	0	0	0	0	0	0
FBti0019399	0.735542	0.0745656	0.142539	0.523124	0.600888	NA	0	1	0	1	0	1
FBti0019409	0	NA	NA	NA	NA	NA	0	0	0	0	0	0
FBti0019410	0.660868	-0.086801	0.119071	-0.728983	0.466012	NA	2	3	0	0	0	0
FBti0019412	0	NA	NA	NA	NA	NA	0	0	0	0	0	0
FBti0019413	0	NA	NA	NA	NA	NA	0	0	0	0	0	0
FBti0020383	0	NA	NA	NA	NA	NA	0	0	0	0	0	0
FBti0019416	0.751701	-0.0582674	0.0968198	-0.601813	0.547298	NA	0	0	5	0	0	0
FBti0019415	0	NA	NA	NA	NA	NA	0	0	0	0	0	0
FBti0019418	0	NA	NA	NA	NA	NA	0	0	0	0	0	0
FBti0019420	0.451021	-0.0463905	0.095012	-0.48826	0.625366	NA	0	0	3	0	0	0
FBti0019421	5.153	0.0445325	0.175613	0.253583	0.799818	NA	0	10	5	5	5	0
FBti0019422	20.3593	0.0180112	0.104258	0.172756	NA	NA	58	0	0	0	0	107
FBti0019424	1.80511	0.187477	0.160616	1.16724	0.243114	NA	0	1	0	2	0	6
FBti0019423	0	NA	NA	NA	NA	NA	0	0	0	0	0	0
FBti0019426	0	NA	NA	NA	NA	NA	0	0	0	0	0	0
FBti0019427	2.85248	-0.0546841	0.273959	-0.199607	0.841788	NA	2	5	4	1	2	5
FBti0019429	3.64127	-0.484853	0.251387	-1.92871	0.0537669	NA	11	8	5	0	0	3
FBti0019428	0	NA	NA	NA	NA	NA	0	0	0	0	0	0
FBti0019432	0	NA	NA	NA	NA	NA	0	0	0	0	0	0
FBti0019431	2.94861	0.0786311	0.0999091	0.787027	0.431266	NA	0	0	0	6	0	0
FBti0019433	0	NA	NA	NA	NA	NA	0	0	0	0	0	0
FBti0019434	1.50314	0.0767578	0.0984658	0.779538	NA	NA	0	0	0	0	0	13
FBti0019437	0.137713	-0.0106171	0.0934144	-0.113656	0.909511	NA	1	0	0	0	0	0
FBti0019438	0	NA	NA	NA	NA	NA	0	0	0	0	0	0
FBti0020388	4.87475	0.0663401	0.148134	0.447838	0.65427	NA	0	12	0	0	13	14
FBti0020390	2.63726	0.0785371	0.0998362	0.78666	NA	NA	0	0	0	0	20	0
FBti0019449	0.379352	0.107984	0.117402	0.919782	0.357686	NA	0	0	0	0	2	1
FBti0019452	0.266194	-0.0487963	0.113622	-0.429463	0.667586	NA	1	1	0	0	0	0
FBti0019453	0	NA	NA	NA	NA	NA	0	0	0	0	0	0
FBti0019456	1.80511	0.187477	0.160616	1.16724	0.243114	NA	0	1	0	2	0	6
FBti0019459	1.80511	0.187477	0.160616	1.16724	0.243114	NA	0	1	0	2	0	6
FBti0019470	0	NA	NA	NA	NA	NA	0	0	0	0	0	0
FBti0019839	3.07339	-0.0765309	0.269248	-0.28424	0.776227	NA	2	4	6	1	5	2
FBti0019843	3.13505	-0.356678	0.277229	-1.28658	0.198241	NA	6	4	7	0	3	3
FBti0019230	1.16831	-0.0430435	0.199442	-0.21582	0.829128	NA	1	2	1	1	1	0
FBti0019231	0	NA	NA	NA	NA	NA	0	0	0	0	0	0
FBti0019235	5.0945	-0.434632	0.296807	-1.46436	0.143096	NA	7	8	11	1	2	6
FBti0019236	0	NA	NA	NA	NA	NA	0	0	0	0	0	0
FBti0019841	2.49013	0.304269	0.220518	1.37979	0.167651	NA	0	3	0	2	5	4
FBti0019849	1.16731	-0.0179796	0.144216	-0.124671	0.900784	NA	5	0	0	0	1	3
FBti0019240	0	NA	NA	NA	NA	NA	0	0	0	0	0	0
FBti0019850	0.128481	-0.0106171	0.0934144	-0.113656	0.909511	NA	0	1	0	0	0	0
FBti0019244	4.97144	0.034927	0.193551	0.180453	0.856797	NA	9	8	0	0	17	4
FBti0019245	0	NA	NA	NA	NA	NA	0	0	0	0	0	0
FBti0019852	0.115626	0.0334189	0.0934144	0.357749	0.720531	NA	0	0	0	0	0	1
FBti0019243	0.300681	-0.03254	0.0934272	-0.348292	0.727621	NA	0	0	2	0	0	0
FBti0019242	0.548397	-0.0877133	0.182448	-0.480758	0.630689	NA	1	1	1	0	1	0
FBti0019851	0.275426	-0.03254	0.0934272	-0.348292	0.727621	NA	2	0	0	0	0	0
FBti0019239	0	NA	NA	NA	NA	NA	0	0	0	0	0	0
FBti0019848	0	NA	NA	NA	NA	NA	0	0	0	0	0	0
FBti0019854	0.15034	-0.0106171	0.0934144	-0.113656	0.909511	NA	0	0	1	0	0	0
FBti0019248	0	NA	NA	NA	NA	NA	0	0	0	0	0	0
FBti0019249	0.985418	0.101766	0.157704	0.645299	0.518734	NA	2	0	0	0	1	5
FBti0019860	0.507833	0.114928	0.158138	0.726759	0.467374	NA	0	1	0	0	2	1
FBti0019861	1.05238	-0.065836	0.0976988	-0.673867	0.500396	NA	0	0	7	0	0	0
FBti0019862	1.82727	0.18037	0.17068	1.05677	0.290617	NA	2	0	0	0	3	10
FBti0019858	3.51444	-0.057287	0.246886	-0.232038	0.816508	NA	1	9	5	0	5	7
FBti0019857	1.92533	0.0393327	0.100582	0.391051	0.69576	NA	0	0	3	3	0	0
FBti0019251	1.57199	-0.0956681	0.236305	-0.40485	0.685588	NA	2	2	2	1	1	1
FBti0019855	0	NA	NA	NA	NA	NA	0	0	0	0	0	0
FBti0018875	0	NA	NA	NA	NA	NA	0	0	0	0	0	0
FBti0018898	0.395589	0.0687931	0.0944153	0.728622	0.466233	NA	0	0	0	0	3	0
FBti0019940	1.7759	-0.27014	0.242517	-1.1139	0.265321	NA	5	2	3	0	2	1
FBti0019914	1.00504	-0.114802	0.14835	-0.773855	0.439016	NA	1	0	5	0	0	1
FBti0019916	3.81798	-0.299004	0.254645	-1.1742	0.240316	NA	13	3	5	0	5	2
FBti0019035	2.83414	0.106985	0.243728	0.438951	0.660697	NA	6	2	1	0	6	7
FBti0019918	0.247489	0.0835798	0.114463	0.730188	0.465275	NA	0	0	0	0	1	1
FBti0019919	1.28956	-0.000430773	0.205906	-0.00209209	0.998331	NA	1	1	2	1	0	2
FBti0018900	4.57842	-0.140597	0.300362	-0.468091	0.639719	NA	5	7	6	2	4	5
FBti0019922	0.131863	0.0334189	0.0934144	0.357749	0.720531	NA	0	0	0	0	1	0
FBti0019931	0.15034	-0.0106171	0.0934144	-0.113656	0.909511	NA	0	0	1	0	0	0
FBti0019006	1.26431	0.00892987	0.177658	0.0502645	0.959912	NA	3	1	0	1	0	2
FBti0019935	0	NA	NA	NA	NA	NA	0	0	0	0	0	0
FBti0019939	1.6037	-0.215419	0.230271	-0.935503	0.349529	NA	5	3	1	0	2	1
FBti0019937	0.115626	0.0334189	0.0934144	0.357749	0.720531	NA	0	0	0	0	0	1
FBti0019929	2.70029	-0.367825	0.257196	-1.43014	0.152678	NA	2	8	6	0	2	2
FBti0019927	3.64018	0.00338791	0.223344	0.015169	0.987897	NA	10	0	3	1	3	8
FBti0019926	0	NA	NA	NA	NA	NA	0	0	0	0	0	0
FBti0019924	0.751701	-0.0582674	0.0968198	-0.601813	0.547298	NA	0	0	5	0	0	0
FBti0019920	2.77948	0.127713	0.261387	0.488599	0.625126	NA	2	2	4	1	7	2
FBti0019039	3.80372	-0.0563488	0.250474	-0.224968	0.822004	NA	5	9	1	2	1	6
FBti0018957	1.33929	-0.043473	0.149328	-0.291125	0.770956	NA	2	0	4	0	0	4
FBti0019274	0.115626	0.0334189	0.0934144	0.357749	0.720531	NA	0	0	0	0	0	1
FBti0018942	0	NA	NA	NA	NA	NA	0	0	0	0	0	0
FBti0018890	4.02	0.13044	0.26704	0.488466	0.62522	NA	5	6	2	0	11	7
FBti0019038	1.53182	0.0141046	0.207395	0.0680081	0.945779	NA	2	4	0	0	3	3
FBti0018919	4.5988	-0.284429	0.275232	-1.03341	0.30141	NA	14	6	3	1	2	6
FBti0019004	3.71258	-0.008779	0.189641	-0.0462928	0.963077	NA	13	1	0	1	9	1
FBti0019271	0.519533	-0.0621278	0.153644	-0.404363	0.685946	NA	2	1	0	0	0	1
FBti0018943	0.128481	-0.0106171	0.0934144	-0.113656	0.909511	NA	0	1	0	0	0	0
FBti0019272	0	NA	NA	NA	NA	NA	0	0	0	0	0	0
FBti0019908	2.55869	-0.158626	0.158414	-1.00133	0.316665	NA	12	5	0	0	2	0
FBti0019273	0.52631	0.0276088	0.18004	0.153348	0.878124	NA	0	1	1	0	1	1
FBti0019910	0.451021	-0.0463905	0.095012	-0.48826	0.625366	NA	0	0	3	0	0	0
FBti0019903	0.742467	0.142858	0.131792	1.08397	0.278378	NA	0	0	0	0	3	3
FBti0018891	0.247489	0.0835798	0.114463	0.730188	0.465275	NA	0	0	0	0	1	1
FBti0019902	0.659315	0.0726333	0.0963794	0.753618	0.451078	NA	0	0	0	0	5	0
FBti0018909	2.86862	-0.539986	0.23569	-2.29108	0.0219588	NA	9	8	4	0	0	0
FBti0018954	0	NA	NA	NA	NA	NA	0	0	0	0	0	0
FBti0018887	0.137713	-0.0106171	0.0934144	-0.113656	0.909511	NA	1	0	0	0	0	0
FBti0019886	0	NA	NA	NA	NA	NA	0	0	0	0	0	0
FBti0019889	0	NA	NA	NA	NA	NA	0	0	0	0	0	0
FBti0019890	0.491435	0.0334189	0.0934144	0.357749	0.720531	NA	0	0	0	1	0	0
FBti0019891	3.49509	-0.542175	0.278923	-1.94382	0.0519173	NA	6	8	6	1	1	1
FBti0018938	2.28575	0.14868	0.251512	0.591143	0.554425	NA	3	3	1	0	4	7
FBti0018889	3.52347	-0.221077	0.270687	-0.816726	0.414085	NA	7	2	7	1	4	2
FBti0019896	0.137713	-0.0106171	0.0934144	-0.113656	0.909511	NA	1	0	0	0	0	0
FBti0018977	2.17757	-0.166757	0.204422	-0.815747	0.414645	NA	7	3	2	0	4	0
FBti0019270	0.917362	-0.0320024	0.214856	-0.148948	0.881595	NA	2	1	1	0	1	2
FBti0019032	0.748397	-0.00157505	0.104524	-0.0150688	0.987977	NA	0	2	0	1	0	0
FBti0019888	1.34767	0.0184843	0.221088	0.0836061	0.93337	NA	2	1	2	0	4	1
FBti0019267	2.19708	0.0444427	0.139586	0.31839	0.750189	NA	0	0	5	2	0	4
FBti0019883	0	NA	NA	NA	NA	NA	0	0	0	0	0	0
FBti0019275	0.967159	-0.127369	0.157345	-0.809488	0.418235	NA	4	0	2	0	0	1
FBti0018939	0.554247	-0.159546	0.161687	-0.986757	0.323762	NA	2	1	1	0	0	0
FBti0019972	0	NA	NA	NA	NA	NA	0	0	0	0	0	0
FBti0018980	0	NA	NA	NA	NA	NA	0	0	0	0	0	0
FBti0019276	3.97606	0.197453	0.152013	1.29892	0.193971	NA	0	0	0	0	17	15
FBti0019969	4.8464	-0.149505	0.136045	-1.09894	0.271795	NA	21	0	13	0	0	0
FBti0019968	3.04698	-0.17128	0.281184	-0.609138	0.542433	NA	6	3	4	1	3	3
FBti0019966	0.137713	-0.0106171	0.0934144	-0.113656	0.909511	NA	1	0	0	0	0	0
FBti0019957	0	NA	NA	NA	NA	NA	0	0	0	0	0	0
FBti0018933	0.792116	-0.00465423	0.103315	-0.045049	0.964068	NA	0	0	2	1	0	0
FBti0019954	2.10524	-0.192022	0.164883	-1.1646	0.244182	NA	5	10	0	0	1	0
FBti0019949	0	NA	NA	NA	NA	NA	0	0	0	0	0	0
FBti0018932	0.522915	0.0188749	0.15098	0.125016	0.900511	NA	2	0	0	0	1	1
FBti0018876	0.137713	-0.0106171	0.0934144	-0.113656	0.909511	NA	1	0	0	0	0	0
FBti0019973	1.14283	0.0527043	0.201014	0.262192	0.793173	NA	2	1	0	1	1	1
FBti0018917	4.47105	-0.0301183	0.103031	-0.292324	0.770039	NA	0	24	0	0	0	12
FBti0018940	0	NA	NA	NA	NA	NA	0	0	0	0	0	0
FBti0018970	15.9564	0.0806769	0.101512	0.794753	NA	NA	0	0	0	0	0	138
FBti0019994	0	NA	NA	NA	NA	NA	0	0	0	0	0	0
FBti0018992	0	NA	NA	NA	NA	NA	0	0	0	0	0	0
FBti0019013	0	NA	NA	NA	NA	NA	0	0	0	0	0	0
FBti0018991	0	NA	NA	NA	NA	NA	0	0	0	0	0	0
FBti0018948	0	NA	NA	NA	NA	NA	0	0	0	0	0	0
FBti0019993	0.940591	0.0163412	0.106597	0.153299	0.878163	NA	3	0	0	0	4	0
FBti0018947	0	NA	NA	NA	NA	NA	0	0	0	0	0	0
FBti0018989	0	NA	NA	NA	NA	NA	0	0	0	0	0	0
FBti0019025	25.9055	0.0180585	0.18093	0.0998093	NA	NA	22	30	35	0	0	119
FBti0018945	0.416534	-0.129093	0.154864	-0.833588	0.404513	NA	1	1	1	0	0	0
FBti0019008	0	NA	NA	NA	NA	NA	0	0	0	0	0	0
FBti0018988	0	NA	NA	NA	NA	NA	0	0	0	0	0	0
FBti0018904	0	NA	NA	NA	NA	NA	0	0	0	0	0	0
FBti0019022	1.27188	0.0760965	0.0980901	0.775782	0.437878	NA	0	0	0	0	0	11
FBti0018937	13.297	0.080589	0.101443	0.79443	NA	NA	0	0	0	0	0	115
FBti0019041	0	NA	NA	NA	NA	NA	0	0	0	0	0	0
FBti0018878	0	NA	NA	NA	NA	NA	0	0	0	0	0	0
[truncated: 3,393 more rows]
